# Supplementary material for: Interferon-γ responses to Plasmodium falciparum vaccine candidate antigens decrease in the absence of malaria transmission
Source: PeerJ. 2017 Jan 10;5:e2855. doi: 10.7717/peerj.2855 (PMC5228499; doi:10.7717/peerj.2855)
Supplement: Supplemental Information 1 [file peerj-05-2855-s004.xls]

## Sheet: IFN-G data 
STUDYID	SEX	R52_Age	R52_HB	R52_PHA	R52_PHA_Yes_No	R52_AMA1P	R52_AMA1P_Yes_No	R52_CSP22_p001	R52_CSP22_Yes_No	R52_LSA-1_t3	R52_LSA-1_t3_Yes_No	R52_MB2	R52_MB2_Yes_No	R52_MSP-1	R52_MSP-1_Yes_No	R52_tp6	R52_tp6_Yes_No	R54_Age	R54_HB	R54_PHA	R54_PHA_Yes_No	R54_AMA1P	R54_AMA1P_Yes_No	R54_CSP_22	R54_CSP22_Yes_No	R54_LSA-1_t3	R54_LSA-1_t3_Yes_No	R54_MB2	R54_MB2_Yes_No	R54_MSP-1	R54_MSP-1_Yes_No	R54_tp6	R54_tp6_Yes_No	R56_Age	R56_HB	R56_PHA	R56_PHA_Yes_No	R56_AMA-1P	R56_AMA-1P_Yes_No	R56_CSP_22	R56_CSP_22_Yes_No	R56_LSA-1_t3	R56_LSA-1_t3_Yes_No	R56_MB2	R56_MB2_Yes_No	R56_MSP-1	R56_MSP-1_Yes_No	R56_tp6	R56_tp6_Yes_No
201001402	2	30.8173	12.5	11267.6	1	0.01	0	0.01	0	0.01	0	8.86	0	0.01	0	0.01	0	31.2964	12	6117.57	1	10.48	0	0.01	0	46.22	0	0.01	0	21.31	0	3.07	0	31.7755	14.8	14460.3	1	0.01	0	5.03	0	0.01	0	0.01	0	0.01	0	0.01	0
201001701	2	49.7084	14.7	13809.9	1	0.01	0	0.01	0	0.01	0	14.47	0	29.93	0	0.01	0	50.1875	15.1	5030.51	1	15.65	0	0.01	0	0.01	0	0.01	0	0.01	0	49.29	1	50.6667	14.2	13051.9	1	0.01	0	0.01	0	0.01	0	0.01	0	0.01	0	0.01	0
201003502	2	40.3258	15.2	10541.5	1	0.01	0	16.29	0	54.56	0	0.01	0	157.64	1	93.1	1	40.8241	13.9	39776.1	1	0.01	0	105.37	1	0.01	0	0.01	0	0.01	0	0.01	0	41.3032	14.1	257.07	1	0.01	0	0.01	0	16.74	0	2.34	0	4.55	0	23.55	0
201003507	1	6.91034	12.1	2683.32	1	680.29	1	0.01	0	0.01	0	0.01	0	1067.1	1	435.32	1	7.40862	12.2	874.66	1	0.01	0	0.01	0	0.01	0	0.01	0	0.23	0	26.79	0	7.88775	12.5	8681.58	1	0.01	0	0.01	0	0.01	0	0.01	0	0.01	0	2.03	0
201005301	1	62.3217	15.6	3246.64	1	0.01	0	0.01	0	0.01	0	0.01	0	0.01	0	0.01	0	62.82	15.4	5049.17	1	2.09	0	77.05	1	0.01	0	54.62	0	91.01	1	50.43	1	63.2991	14.1	13251.4	1	0.01	0	2.32	0	15.59	0	32.9	0	91.07	1	1.29	0
201005302	2	49.9001	14.7	43104.4	1	1.42	0	59.82	1	0.01	0	8.72	0	66.04	1	1169.04	1	50.3984	13.9	5049.17	1	13.32	0	0.01	0	114.47	1	360.12	1	0.01	0	47	1	50.8775	14.6	13503	1	0.01	0	0.01	0	0.01	0	0.01	0	15.81	0	0.01	0
201005307	1	9.72211	14.9	14900.6	1	0.01	0	0.01	0	0.01	0	15.34	0	0.01	0	0.01	0	10.2204	14.2	2625.7	1	0.01	0	0.01	0	0.01	0	0.01	0	0.01	0	0.01	0	10.6995	13.2	12329	1	0.01	0	0.01	0	0.01	0	9.23	0	0.01	0	0.01	0
201006102	2	37.4757	13.3	14990	1	0.01	0	0.01	0	67.69	0	43.98	0	262.94	1	145.42	1	37.974	13.3	12704.4	1	0.01	0	0.01	0	0.01	0	0.01	0	0.01	0	0.01	0	38.4531	9.3	4993.9	1	0.01	0	0.01	0	11.01	0	0.01	0	128.87	1	0.01	0
201006109	2	3.51814	12.5	1832.53	1	0.01	0	0.01	0	37.18	0	14.72	0	186.52	1	0.01	0	4.01643	12.6	140.66	1	0.01	0	0.01	0	0.01	0	0.01	0	17.45	0	0.01	0	4.49555	13	4993.7	1	0.01	0	0.01	0	0.01	0	0.01	0	0.01	0	0.01	0
201007503	1	20.8049	15.6	4736.47	1	0.01	0	0.01	0	0.01	0	0.01	0	220.48	1	0.01	0	21.3416	18.8	3971.07	1	1.29	0	0.01	0	6.67	0	2.79	0	3.1	0	0.51	0	21.7823	13.2	12145.5	1	0.01	0	0.01	0	0.01	0	0.58	0	0.01	0	0.01	0
201008102	2	39.7344	12.8	4978.83	1	20.17	0	0.01	0	0.01	0	49.37	0	110.19	1	0.01	0	40.2327	14.6	10198.5	1	0.01	0	0.01	0	0.01	0	54.97	0	0.01	0	0.01	0	40.7118	10.3	5010.4	1	0.01	0	0.01	0	0.01	0	0.01	0	0.01	0	0.01	0
201008104	2	18.8884	14.3	17768.5	1	0.01	0	0.01	0	0.01	0	0.01	0	306.12	1	0.01	0	19.425	15.1	4164.88	1	0.01	0	0.01	0	6.21	0	4.53	0	0.01	0	0.01	0	19.8658	15.9	5014.1	1	0.01	0	0.01	0	0.01	0	0.01	0	0.01	0	40.87	1
201009402	2	28.8871	14.8	4954.29	1	18.79	0	0.01	0	223.18	1	166.5	1	1353.69	1	481.14	1	29.4264	15.1	6685.8	1	12.59	0	13.08	0	0.01	0	0.01	0	0.01	0	1.58	0	29.8645	14.4	5204.61	1	151.54	1	0.01	0	31.22	0	0.01	0	6.66	0	0.01	0
201009903	2	30.3901	9.4	14583.8	1	34.84	0	8.92	0	0.01	0	29.77	0	0.01	0	31.06	1	30.8884	9.9	3646.07	1	0.01	0	0.01	0	5.12	0	7.86	0	2.26	0	0.01	0	31.3511	11.3	13250.7	1	0.01	0	0.01	0	0.01	0	17.41	0	0.53	0	18.45	0
202014201	1	40.9336	16.6	16668.4	1	0.01	0	0.01	0	0.01	0	0.01	0	0.01	0	0.01	0	41.4073	16.7	18279.3	1	0.01	0	0.01	0	0.01	0	0.01	0	0.01	0	0.01	0	41.87	16.8	15114.8	1	3.51	0	139.36	1	0.01	0	51.32	0	159.04	1	153.94	1
202200201	1	38.3628	18	9.84	0	0.01	0	0.01	0	0.01	0	36.21	0	0.01	0	0.01	0	38.8966	16.3	1653.5	1	0.01	0	0.01	0	5.12	0	0.01	0	0.01	0	0.01	0	39.3593	16.7	13229.3	1	0.01	0	0.01	0	0.01	0	28.84	0	48.4	1	0.01	0
202201006	1	3.2334	12.4	1625.13	1	0.01	0	13.38	0	13.87	0	77.31	1	5.15	0	22.25	0	3.70705	13.2	479.03	1	0.01	0	17.44	0	0.01	0	0.01	0	0.01	0	0.01	0	4.16975	13.1	244.68	1	0.01	0	0.01	0	0.01	0	0.01	0	0.01	0	0.01	0
203020005	2	10.0698	12.9	5.15	0	0.01	0	0.01	0	0.01	0	11.27	0	0.01	0	0.01	0	10.6064	12.5	1371.64	1	0.01	0	0.01	0	0.01	0	0.01	0	0.01	0	0.01	0	11.0856		1855.42	1	0.01	0	0.01	0	0.01	0	0.74	0	0.01	0	0.01	0
203020404	1	17.8973	15.8	15957.1	1	0.01	0	17.58	0	0.01	0	498.92	1	39.44	1	95.59	1	18.3956	17.2	9331.53	1	0.96	0	1.6	0	0.63	0	0.63	0	2.53	0	4.79	0	18.8528	15.3	3134.56	1	27.47	0	0.01	0	0.01	0	0.01	0	0.01	0	0.01	0
203020405	1	15.0801	14.2	19686.7	1	0.01	0	0.01	0	0.01	0	0.01	0	0.01	0	0.01	0	15.5784	14.8	7921.99	1	0.01	0	0.01	0	0.01	0	0.33	0	5.58	0	1.94	0	16.0548	14.4	5227.87	1	0.01	0	0.91	0	0.01	0	8.48	0	0.01	0	1.16	0
203020406	1	12.1287	12	41.07	0	0.01	0	0.01	0	0.01	0	0.01	0	0.01	0	0.01	0	12.6105	13.3	556.64	1	0.01	0	0.01	0	0.01	0	0.01	0	0.01	0	0.01	0	13.0897	13	1850.18	1	0.01	0	0.01	0	0.01	0	0.01	0	0.01	0	0.01	0
203020407	2	9.6345	13.3	54.53	1	32.57	0	32.37	0	34.66	0	55.79	0	0.01	0	234.46	1	10.1711	14.9	1300.16	1	0.01	0	0.01	0	0.01	0	0.01	0	0.01	0	0.01	0	10.6502		1855.42	1	0.01	0	3826.92	1	450.23	1	0.01	0	0.01	0	0.01	0
203021101	1	55.9973	14.8	19627.3	1	259.34	1	0.01	0	4.54	0	343.19	1	172.22	1	13.11	0	56.4928	14.9	19994.4	1	0.01	0	0.01	0	0.01	0	0.01	0	0.01	0	71.53	1	56.9719	15.2	13.43	0	0.01	0	0.01	0	10.44	0	0.44	0	0.01	0	0.01	0
203023203	1	15.7071	15.6	0.01	0	0.01	0	0.01	0	0.01	0	0.01	0	0.01	0	0.01	0	16.2437	15	10991.1	1	1.24	0	1.88	0	4.16	0			3.46	0	6.1	0	16.7009	15.3	7900.92	1	0.01	0	441	1	0.01	0	59.35	0	16.13	0	11.55	0
203023205	2	10.6721	14.4	15790.7	1	0.01	0	88.12	1	49.83	0	0.01	0	29.75	0	41.61	1	11.1704	16	7928.5	1	0.01	0	0.01	0	0.01	0	0.01	0	1.1	0	9.27	0	11.6276	14.9	6869.47	1	0.01	0	0.01	0	0.01	0	0.01	0	0.01	0	0.01	0
203023206	2	8.19986	12.9	0.01	0	0.01	0	0.01	0	0.01	0	18.32	0	0.01	0	0.01	0	8.73648	12.5	5237.47	1	0.01	0	0.01	0	0.01	0	0.01	0	0.01	0	0.01	0	9.1937	13.5	1054.45	1	0.01	0	0.01	0	0.01	0	1.93	0	0.01	0	0.01	0
203025201	1	50.4942	14.8	25705.9	1	6.94	0	9.95	0	3.98	0	10.45	0	0.01	0	0.55	0	50.9925	14.2	9832.6	1	0.01	0	0.01	0	0.01	0	0.57	0	0.01	0	0.01	0	51.4716	14	10493.4	1	0.01	0	0.01	0	0.01	0	0.01	0	0.01	0	4.8	0
203025207	2	19.6496	13.7	14.75	0	0.01	0	104.01	1	15.58	0	258.16	1	91.59	1	0.01	0	20.2245	13	220.9	1	0.31	0	1.04	0	1.62	0	2.03	0	0.01	0	0.62	0	20.6653	13.5	15589.6	1	1.84	0	0.01	0	0.01	0	2.32	0	2.96	0	0.01	0
203025208	1	15.7645	16.9	260.05	1	0.01	0	21.65	0	0.01	0	49.66	0	0.01	0	0.01	0	16.3012	16.6	1311.88	1	0.23	0	0.87	0	0.01	0	4.22	0	10.54	0	0.23	0	16.7803	16.1	9384.35	1	0.01	0	0.01	0	0.01	0	0.01	0	0.01	0	0.01	0
203025209	2	14.809	13.5	14427.3	1	8.67	0	0.01	0	58.96	0	26.16	0	63.44	1	7.43	0	15.3073	13.9	3975.95	1	4.56	0	2.58	0	0.96	0	2.59	0	0.96	0	2.25	0	15.7865	13.5	9846.49	1	0.01	0	0.01	0	0.01	0	0.01	0	0.01	0	0.01	0
203025211	1	4.9911	14.7	0.01	0	3.09	0	2.9	0	5.53	0	31.52	0	0.01	0	0.01	0	5.54415	14.7	0.01	0	0.01	0	0.01	0	0.01	0	0.01	0	0.01	0	0.01	0	6.00685	13.3	10367.5	1	0.01	0	0.01	0	0.01	0	3.76	0	5.09	0	0.01	0
203301004	2	29.3114	11.2	0.33	0	0.01	0	0.01	0	0.01	0	31.05	0	0.01	0	0.01	0	29.8481	15.6	14266	1	1.28	0	8.7	0	0.01	0	0.01	0	0.01	0	5.73	0	30.3053	15.8	6869.47	1	0.01	0	0.01	0	0.01	0	0.01	0	0.01	0	0.01	0
203301005	2	9.59617	14.1	240.36	1	0.01	0	0.01	0	0.01	0	0.01	0	0.01	0	72.96	1	10.1328	12.9	12386.8	1	0.01	0	0.01	0	0.01	0	0.01	0	0.01	0	0.01	0	10.59	14.3	4491.83	1	2.36	0	3.84	0	0.01	0	5.14	0	850.2	1	3.84	0
203301007	2	4.50376	14.6	0.01	0	0.01	0	0.01	0	0.01	0	25.59	0	0.01	0	0.01	0	5.04038	11.7	167.71	1	0.01	0	0.01	0	0.01	0	0.01	0	0.01	0	0.01	0	5.4976	12.6	1353.52	1	0.01	0	0.01	0	0.01	0	0.01	0	0.01	0	0.01	0
203301401	2	5.04312	12.4	12465	1	0.01	0	0.01	0	0.01	0	0.01	0	0.01	0	0.01	0	5.54141	13	1369.83	1	0.01	0	0.01	0	0.01	0	0.01	0	0.01	0	0.01	0	5.99863	13	1514.05	1	0.01	0	0.01	0	0.01	0	0.01	0	0.01	0	0.01	0
204026505	1	28.293	15.1	19.53	0	1.29	0	45.03	1	27.48	0	12.37	0	29.1	0	38.65	1	28.8296	15.8	7261.5	1	0.01	0	6.31	0	9.51	0	8.81	0	9.87	0	50.44	1	29.3059	13.6	20909.8	1	0.01	0	0.01	0	0.01	0	0.01	0	0.01	0	0.01	0
204026510	1	8.63792	12.6	131.53	1	0.01	0	0.01	0	0.01	0	0.01	0	201.02	1	164.85	1	9.17454	12.6	106.73	1	0.01	0	0.01	0	0.01	0	2.73	0	0.01	0	0.01	0	9.65092	12.3	12394.3	1	0.01	0	0.01	0	0.01	0	0.01	0	0.01	0	0.01	0
204026511	1	6.39288	12.4	11.97	0	0.01	0	0.01	0	0.01	0	7.33	0	2.3	0	0.01	0	6.9295	12.7	5052.23	1	0.01	0	0.01	0	2.73	0	0.01	0	2.73	0	0.01	0	7.40589	11.5	11396.8	1	0.01	0	0.01	0	0.01	0	5.97	0	0.01	0	0.01	0
204026701	1	68.293	13.3	663.14	1	1.48	0	16.56	0	6.09	0	21.82	0	5.48	0	2.74	0	68.8296	15.6	2625.02	1	2.27	0	0.64	0	1.94	0	3.67	0	4.98	0	1.94	0	69.3059	14.3	11302.9	1	0.01	0	0.01	0	0.01	0	0.01	0	0.01	0	0.01	0
204026702	2	54.2916	12.5	63.77	1	0.01	0	0.01	0	0.01	0	2.39	0	0.01	0	57.84	1	54.8282	14.6	2571.29	1	0.01	0	1.03	0	11.12	0	7.82	0	0.01	0	6.88	0	55.3046	12.3	5941.53	1	0.01	0	57.91	1	214	1	0.01	0	0.01	0	0.01	0
204026705	1	11.822	13.1	260.18	1	59.05	1	39.95	0	0.01	0	1.58	0	46.78	1	0.01	0	12.3587	12.9	599.55	1	37.42	0	38.42	0	19.46	0	5.52	0	41.4	1	9.03	0	12.835	12.4	11202.7	1	5.53	0	0.01	0	0.08	0	11.06	0	0.01	0	0.01	0
204027501	2	44.1506	12.5	932.93	1	244.12	1	13.94	0	111.68	1	0.01	0	9.94	0	0.01	0	44.6872	13.1	10482.8	1	25.78	0	0.01	0	12.36	0	0.01	0	15.74	0	0.01	0	45.1417	11.9	13262.8	1	0.01	0	292.73	1	0.02	0	1.86	0	43.42	1	1.12	0
204027506	1	6.29706	12.7	1.71	0	0.01	0	0.01	0	0.31	0	23.55	0	0.01	0	4.46	0	6.83368	12.9	3787.54	1	0.01	0	0.01	0	0.01	0	0.01	0	0.01	0	0.01	0	7.28816	13	722.03	1	0.01	0	0.01	0	0.01	0	1.1	0	0.01	0	0.01	0
204029204	2	16.5914	15.1	161.94	1	0.01	0	0.01	0	0.01	0	4.07	0	0.01	0	0.01	0	17.128	14.6	6090.78	1	2.28	0	2.47	0	19.41	0	0.01	0	14.72	0	0.7	0	17.6044	14.7	10476.2	1	0.01	0	0.01	0	0.01	0	0.01	0	0.01	0	17.35	0
204029206	2	13.7495	14.8	9.07	0	0.01	0	0.77	0	4.46	0	0.01	0	2.23	0	0.01	0	14.2806	14.7	362.65	1	0.01	0	0.01	0	0.01	0	0.01	0	0.01	0	0.01	0	14.7406	14.3	5354.73	1	0.31	0	0.01	0	0.01	0	19.52	0	0.01	0	2.99	0
204029207	1	9.46201	14.2	494.79	1	0.01	0	0.01	0	0.01	0	12.67	0	0.01	0	0.01	0	9.9384	14	304.57	1	0.01	0	0.01	0	0.01	0	43.84	0	5.06	0	0.01	0	10.3984	13.3	2453.8	1	0.01	0	0.01	0	0.01	0	12.75	0	0.01	0	0.01	0
204029208	2	6.12457	12.8	1056.29	1	0.01	0	0.01	0	0.01	0	19.12	0	0.01	0	0.01	0	6.60643	12.3	1904.92	1	0.01	0	0.01	0	0.01	0	0.01	0	0.01	0	0.01	0	7.08282	13.1	10171.5	1	0.01	0	0.01	0	0.01	0	0.01	0	0.01	0	0.01	0
204029209	1	5.64271	13	0.01	0	0.01	0	0.01	0	0.01	0	12.69	0	0.01	0	0.01	0	6.17933	12.7	8786.74	1	0.01	0	0.01	0	0.01	0	0.01	0	0.01	0	0.01	0	6.63381	13.5	7918.58	1	0.01	0	0.01	0	3.3	0	11.96	0	0.01	0	0.75	0
204029210	2	3.41958	14.8	5.9	0	8.16	0	2.8	0	2.19	0	23	0	0.63	0	7.27	0	3.95619	13.3	81.31	1	0.01	0	0.01	0	35.99	0	0.01	0	0.01	0	0.01	0	4.41068	13.7	837.65	1	0.01	0	0.01	0	0.01	0	1.5	0	0.01	0	0.01	0
204029304	1	27.3922	17.2	7304.82	1	3943.24	1	609	1	1105.39	1	0.01	0	132.65	1	0.01	0	27.9288	17.2	9630.37	1	67.73	1	0.01	0	16	0	2.05	0	13.35	0	122.13	1	28.4052	18.5	22185.3	1	0.01	0	0.01	0	0.01	0	0.01	0	0.01	0	0.01	0
204401301	1	30.7488	17.4	811.67	1	0.01	0	26.47	0	0.01	0	129.87	1	0.01	0	0.01	0	31.2854	17.8	8895.81	1	0.01	0	76.58	1	0.01	0	0.01	0	0.01	0	0.01	0	31.7399	15.4	13176.1	1	0.01	0	4.11	0	0.01	0	15.5	0	0.01	0	0.01	0
204401304	1	3.0527	11.5	33.74	0	7.36	0	11.16	0	0.01	0	66.71	0	63.53	1	0.01	0	3.58932	11.9	1020.87	1	9.49	0	4.52	0	22.96	0	4.03	0	36.4	1	2.01	0	4.04381	10.9	406.78	1	0.01	0	0.01	0	0.01	0	1.84	0	0.01	0	0.01	0
204402501	1	4.13415	12.3	213.94	1	0.01	0	0.01	0	0.01	0	0.01	0	0.01	0	0.01	0	4.62697	12.6	231.26	1	3.19	0	0.01	0	0.01	0	0.01	0	0.01	0	0.01	0	5.06776	13.1	345.09	1	0.01	0	0.01	0	0.01	0	0.01	0	0.01	0	0.01	0
205033901	1	49.306	17.6	259.18	1	0.01	0	0.01	0	0.01	0	43.99	0	36.49	1	0.01	0	49.8426	15.3	973.11	1	0.01	0	0.01	0	0.01	0	0.01	0	0.01	0	0.01	0	50.3025	14.7	6894.44	1	0.01	0	0.01	0	0.01	0	0.01	0	0.01	0	0.01	0
205036802	1	12.2218	14.3	399.34	1	0.01	0	0.01	0	0.01	0	0.01	0	0.01	0	0.01	0	12.742	13.7	7845.11	1	0.01	0	0.01	0	0.01	0	0.01	0	0.01	0	0.01	0	13.2211	14.2	1855.42	1	0.01	0	0.01	0	0.01	0	0.01	0	0.22	0	0.01	0
205037206	1	43.7645	16.9	39.93	0	11.29	0	0.12	0	0.01	0	30.54	0	0.01	0	0.01	0	44.3012	16.2	15032.6	1	0.01	0	0.78	0	0.01	0	0.01	0	26.34	0	0.01	0	44.7611	15.2	0.01	0	0.01	0	0.01	0	0.01	0	0.01	0	0.01	0	0.01	0
205037901	1	57.473	10.5	580.84	1	7.63	0	112.83	1	0.01	0	0.01	0	0.01	0	3.51	0	58.0315	15.8	474.89	1	0.01	0	0.01	0	0.01	0	2.94	0	10.65	0	21.58	0	58.4558	17	6916.38	1	0.01	0	0.01	0	0.01	0	0.01	0	0.01	0	0.01	0
205037902	2	43.3046	14.6	2099.82	1	0.01	0	86.44	1	0.01	0	0.01	0	740.07	1	0.01	0	43.8412	10.2	15242.1	1	0.01	0	0.01	0	0.01	0	0.01	0	0.01	0	0.01	0	44.2875	13.2	692.96	1	0.01	0	0.01	0	0.01	0	0.01	0	227.56	1	0.01	0
205037905	1	14.6119	14.4	481.98	1	177.01	1	0.01	0	0.01	0	69.33	1	0.01	0	21.92	0	15.1321	9.8	6372.99	1	1.91	0	3.87	0	1.92	0	1.59	0	5.86	0	12.04	0	15.5948	14.2	6916.38	1	0.01	0	0.01	0	0.01	0	0.01	0	0.01	0	0.01	0
205037907	2	7.64956	13.1	0.01	0	4338.75	1	1139.67	1	0.01	0	844.46	1	2192.76	1	3525.69	1	8.16975	13.5	168.93	1	0.01	0	0.01	0	0.01	0	0.01	0	0.01	0	0.01	0	8.63244	13.3	344.99	1	0.01	0	0.01	0	0.01	0	0.01	0	0.01	0	0.01	0
205038001	1	52.3066	14.3	63.86	1	0.01	0	2.43	0	5.77	0	24.37	0	0.01	0	0.01	0	52.8433	15.7	31538.5	1	56.92	1	0.01	0	0.01	0	0.01	0	22.01	0	0.01	0	53.2895	14.4	6916.38	1	0.01	0	0.01	0	0.01	0	0.01	0	0.01	0	0.01	0
205038002	2	46.3053	11.7	0.01	0	0.01	0	0.01	0	0.01	0	0.01	0	0.01	0	0.01	0	46.8419	10.8	608.14	1	0.01	0	0.01	0	132.22	1	0.01	0	0.01	0	0.01	0	47.2882	11.7	276.71	1	0.01	0	0.01	0	0.01	0	0.01	0	0.01	0	0.01	0
205038007	2	17.3087	10.2	0.01	0	0.01	0	0.01	0	0.01	0	0.01	0	0.01	0	66.45	1	17.8261	12.7	2390.22	1	3.97	0	4.29	0	6.97	0	5.65	0	4.29	0	3.72	0	18.2888	12.3	168.06	1	0.01	0	0.01	0	0.01	0	0.01	0	0.01	0	0.01	0
205038008	2	12.8925	11.9	360.02	1	0.01	0	57.98	1	0.01	0	0.01	0	0.01	0	0.01	0	13.4127	13.7	1304.2	1	0.01	0	0.01	0	0.01	0	0.01	0	0.01	0	0.01	0	13.8754	13.4	6392.94	1	1.57	0	9.06	0	5.47	0	1.35	0	0.01	0	1.34	0
205038009	2	11.5565	13.4	746.47	1	0.01	0	132.27	1	1113.55	1	0.01	0	283.25	1	362.71	1	12.0767	13.5	107.84	1	0.01	0	0.01	0	0.01	0	0.01	0	2.45	0	0.01	0	12.5394	14.2	744.03	1	0.01	0	0.01	0	0.63	0	0.01	0	0.01	0	0.01	0
205038010	2	9.63997	12.5	17.69	0	0.01	0	230.06	1	109.29	1	133.49	1	637.23	1	86.85	1	10.1602	14	366.88	1	2.88	0	2	0	4.17	0	5.82	0	27.56	0	0.65	0	10.6229	14.6	1112.82	1	1.54	0	0.01	0	0.01	0	0.01	0	0.66	0	0.66	0
205038012	1	6.141	12.4	0.01	0	0.01	0	0.01	0	0.01	0	0.01	0	0.01	0	0.01	0	6.66119	12.2	283.33	1	2.89	0	0.01	0	0.01	0	1.09	0	8.05	0	0.67	0	7.12389	14	294.57	1	0.01	0	0.57	0	0.01	0	0.01	0	0.01	0	0.01	0
205038013	1	6.141	12.1	0.01	0	0.01	0	593.81	1	70.29	0	6.47	0	831.7	1	388.59	1	6.66119	13.5	313.41	1	13.88	0	0.01	0	0.01	0	2.41	0	68.04	1	25.33	0	7.12389	13	1466.07	1	48.91	0	0.01	0	0.01	0	0.01	0	0.33	0	5.2	0
205039506	2	22.9322	16.6	22734.1	1	24.4	0	0.56	0	14.2	0	0.01	0	45.55	1	123.87	1	23.447	14.7	1723.72	1	0.01	0	0.01	0	0.01	0	123.57	1	0.01	0	350.91	1	23.9096	13.8	21365.8	1	0.01	0	0.01	0	0.01	0	8.78	0	77.08	1	0.01	0
205039608	2	8.16427	11.1	26.53	0	0.01	0	0.01	0	0.01	0	0.01	0	0.01	0	0.01	0	8.69815	10.1	1225.15	1	0.01	0	0.01	0	0.01	0	0.01	0	1.78	0	2.87	0	9.14442	11.9	1701.34	1	0.01	0	0.01	0	0.01	0	0.01	0	0.01	0	0.01	0
205039609	1	6.50787	14.5	0.01	0	0.01	0	0.01	0	0.01	0	1.45	0	0.01	0	0.01	0	7.04175	14.9	1072.18	1	0.01	0	0.01	0	0.01	0	0.01	0	0.01	0	0.01	0	7.48802	14.6	1348.97	1	2.26	0	4.83	0	2.26	0	0.02	0	3.41	0	4.82	0
205039610	2	4.10678	13.1	93.53	1	39.54	0	7.72	0	32.74	0	45.67	0	0.01	0	0.01	0	4.64066	13.1	180.1	1	0.01	0	0.01	0	0.01	0	0.01	0	0.01	0	0.01	0	5.08693	14.1	451.34	1	1.63	0	0.7	0	2.1	0	0.93	0	0.47	0	3.97	0
205500302	2	30.3053	14.5	174.28	1	0.01	0	7.12	0	0.01	0	30.24	0	75.92	1	0.01	0	30.8419	14.7	14060.2	1	0.01	0	0.01	0	0.01	0	0.01	0	0.01	0	0.01	0	31.3073	14.2	5498.71	1	4.55	0	0.75	0	0.01	0	8.88	0	80.94	1	13.65	0
205500304	1	3.94251	11.9	6.5	0	25.48	0	0.01	0	115.69	1	0.01	0	76.76	1	0.01	0	4.47912	13.6	40.72	0	0.01	0	0.01	0	0.01	0	0.01	0	0.01	0	0.01	0	4.94456	10.8	1135.31	1	23.43	0	0.01	0	0.01	0	0.01	0	0.01	0	0.01	0
206040609	2	11.2854	14.4	98.05	1	0.01	0	0.01	0	28.98	0	9.17	0	0.01	0	0.01	0	11.8193	14.2	107.29	1	0.01	0	0.01	0	0.01	0	0.01	0	0.01	0	0.01	0	12.2656	15.1	373.13	1	0.01	0	0.01	0	8.13	0	0.01	0	0.01	0	0.01	0
206040612	2	7.06639	13.1	21.08	0	1.42	0	21.44	0	4.45	0	5.05	0	78.9	1	101.89	1	7.60027	12.3	283.42	1	28.32	0	0.01	0	0.01	0					25.32	0	8.04654	14.8	570.98	1	78.23	1	0.01	0	0.01	0					0.24	0
206040616	2	4.55578	10.8	23.61	0	0.01	0	0.01	0	0.01	0	9.86	0	0.01	0	0.01	0	5.08966	12.4	0.01	0	0.01	0	0.01	0	0.01	0	0.01	0	0.01	0	0.01	0	5.53593	11.7	512.46	1	0.25	0	0.01	0	0.01	0	0.01	0	0.01	0	0.24	0
206040618	2	2.39288	12.2	0.01	0	0.01	0	2.47	0	0.01	0	7.88	0	4.97	0	0.01	0	2.92676	12.7	0.01	0	0.01	0	0.01	0	0.01	0	0.01	0	0.01	0	0.01	0	3.37303	12.4	319.66	1	0.01	0	0.01	0	0.01	0	0.01	0	0.01	0	0.01	0
206041806	2	10.9788	13.2	8.37	0	0.01	0	0.01	0	0.01	0	0.01	0	0.01	0	0.01	0	11.5127	13.5	243.7	1	0.01	0	0.01	0	0.01	0			0.01	0	0.01	0	11.9589	14.5	1762.93	1	0.01	0	0.01	0	0.01	0	0.01	0	58.16	1	0.01	0
206043301	1	56.3477	14.8	18275.6	1	46.51	0	0.01	0	0.01	0	15.19	0	0.01	0	0.01	0	56.8652	14.4	4524.12	1	0.01	0	0.01	0	0.71	0	0.01	0	1.72	0	0.29	0	57.2895	13.8	806.47	1	0.01	0	0.01	0	33.23	0	5.04	0	0.01	0	56.77	1
206043302	2	46.308	13.6	1284.91	1	0.01	0	0.16	0	13.47	0	67.31	1	336.21	1	323.72	1	46.8419	14.9	24087.6	1	0.01	0	0.01	0	4.17	0	0.01	0	14.14	0	0.01	0	47.2882	13.5	1468.04	1	0.01	0	17.88	0	0.01	0	21.04	0	131.14	1	179.16	1
206043304	1	8.68994	14.1	1918.5	1	0.01	0	0.01	0	0.01	0	7.5	0	0.52	0	0.01	0	9.18549	13.8	281.69	1	0.01	0	0.01	0	0.01	0	0.01	0	0.01	0	0.01	0	9.64819	14.3	11438.7	1	0.01	0	26.46	0	0.01	0	0.55	0	0.01	0	0.01	0
206043305	1	6.60917	11.7	37.47	0	0.01	0	0.01	0	0.01	0	5.36	0	49.8	1	0.01	0	7.14305	12.7	110.62	1	0.01	0	0.01	0	0.01	0	0.01	0	0.01	0	0.01	0	7.58932	12.8	1011.14	1	0.01	0	0.01	0	0.01	0	0.01	0	0.01	0	0.01	0
206045602	2	42.3272	15.7	15059.4	1	0.7	0	69.91	1	41.98	0	35.96	0	101.76	1	42.45	1	42.8419	14.8	1723.72	1	0.01	0	0.01	0	0.01	0	0.01	0	0.01	0	0.01	0	43.3073	14.5	10489.7	1	3.06	0	769.6	1	6.74	0	5.69	0	1.5	0	6.54	0
206045606	2	17.243	13.9	10461.9	1	2.6	0	0.01	0	3.67	0	19.52	0	0.01	0	0.01	0	17.7577	12.5	6840.31	1	0.01	0	0.01	0	0.01	0	0.01	0	0.01	0	0.01	0	18.2204	12.2	11870.7	1	0.01	0	0.01	0	0.01	0	0.01	0	0.01	0	12.43	0
206600602	2	28.6407	15	74.76	1	0.01	0	6.29	0	2.05	0	10.63	0	0.07	0	25.85	0	29.1745	12.7	5567.97	1	0.01	0	0.01	0	0.01	0	0.01	0	0.01	0	0.01	0	29.6208	15.2	3940.37	1	0.01	0	0.01	0	0.01	0	0.01	0	0.01	0	0.01	0
206601501	1	30.475	14.2	30.38	0	134.58	1	15.09	0	58.24	0	15.45	0	72.7	1	16.87	0	31.0308	15	411.11	1	4.91	0	10.43	0	2.02	0	17.4	0	9.78	0	0.01	0	31.4552	13.8	34.16	0	0.01	0	0.01	0	0.01	0	0.01	0	0.01	0	0.86	0
206601502	2	26.6338	13.9	59.76	1	0.01	0	24.69	0	0.01	0	13.55	0	0.01	0	18.72	0	27.1677	14.2	10727.6	1	0.01	0	0.01	0	61.91	0	22.38	0	0.01	0	0.01	0	27.614	14	244.16	1	0.01	0	0.01	0	0.01	0	0.01	0	0.01	0	0.01	0
206603401	1	4.13142	11.7	33.21	0	0.01	0	0.01	0	0.01	0	30.96	0	0.01	0	0.01	0	4.6653	10.9	217.16	1	0.01	0	0.01	0	0.01	0	0.01	0	0.01	0	0.01	0	5.11157	11.7	162.69	1	0.01	0	0.01	0	0.01	0	0.01	0	0.01	0	0.01	0
206604701	1	62.308	16.1	147.25	1	3.81	0	2.15	0	10.6	0	14.68	0	6.81	0	0.01	0	62.8419	15.1	2186.56	1	0.01	0	0.01	0	0.01	0	1.37	0	0.01	0	0.01	0	63.2882	16.6	2692.32	1	0.01	0	0.01	0	0.01	0	0.01	0	0.01	0	0.01	0
206605203	1	16.5968	12.2	17487	1	13.18	0	0.01	0	0.01	0	84.41	1	19.07	0	0.01	0	17.1335	12.9	3126.91	1	3.1	0	6.34	0	0.01	0	0.01	0	0.01	0	5.08	0	17.5743	12.3	20634.8	1	0.01	0	0.01	0	0.01	0	0.01	0	24.33	0	0.01	0
206605204	2	14.2861	12.7	819.05	1	0.01	0	0.01	0	0.01	0	11.38	0	1.73	0	0.01	0	14.8227	13.3	8645.83	1	3.6	0	0.01	0	0.01	0	1.99	0	0.01	0	0.01	0	15.2635	11.9	19373.4	1	0.01	0	0.01	0	0.01	0	0.01	0	0.01	0	0.01	0
206606202	1	4.6872	12.7	52.14	1	0.01	0	0.01	0	0.01	0	8.03	0	110.99	1	0.01	0	5.24298	12.6	1344.95	1	6.76	0	21.6	0	10.62	0	0.01	0	0.01	0	40.91	1	5.68378	12.6	10291.1	1	0.01	0	2.21	0	0.01	0	0.01	0	0.01	0	0.01	0
207047702	2	49.3251	14.4	14497.2	1	27.25	0	6.18	0	408.98	1	239.48	1	6.66	0	0.01	0	49.8617	14.9	698.9	1	1.23	0	0.01	0	1.43	0	0.41	0	43.12	1	0.21	0	50.2861	14.2	41660.9	1	0.01	0	0.01	0	197.95	1	108.5	1	0.01	0	29.09	1
207047711	2	26.8118	12.5	209.81	1	0.01	0	0.01	0	0.01	0	23.75	0	0.01	0	0.01	0	27.384	15.5	779.33	1	873.44	1	16.49	0	1.47	0	2.27	0	0.4	0	1.18	0	27.8084	15	47894.5	1	0.01	0	0.01	0	0.01	0	50.99	0	77.43	1	0.01	0
207047712	2	8.84873	13.1	11731.9	1	0.01	0	33.98	0	219.99	1	0.01	0	61.39	1	10.69	0	9.3525	13.8	370.28	1	0.01	0	0.01	0	0.01	0	3.92	0	6.5	0	26.67	0	9.80972	14.1	3604.23	1	0.01	0	0.01	0	0.01	0	0.01	0	0.01	0	0.01	0
207048904	1	36.2409	18.7	2166.71	1	0.01	0	0.01	0	0.01	0	31.04	0	148.77	1	0.01	0	36.7584	18.5	729.97	1	0.01	0	0.01	0	0.01	0	0.01	0	0.01	0	0.01	0	37.2019	19.5	255.57	1	0.01	0	105.01	1	83.94	0	0.01	0	12.85	0	0.01	0
207049301	1	46.3107	14.8	5350.18	1	0.01	0	0.01	0	0.01	0	0.01	0	8.57	0	0.01	0	46.8638	16.2	1846.11	1	0.01	0	0.01	0	0.01	0	0.01	0	0.01	0	0.01	0	47.3073	15	15079.3	1	0.01	0	2497.46	1	0.01	0	18.45	0	64.95	1	0.01	0
207049302	2	34.3107	13.7	3260.45	1	0.01	0	0.01	0	0.01	0	78.62	1	657.68	1	0.01	0	34.861	14.7	655.32	1	2.08	0	4.59	0	2.28	0	0.79	0	4.49	0	1.49	0	35.3073	13.6	14851.9	1	0.01	0	0.01	0	0.01	0	0.01	0	0.01	0	0.01	0
207049501	2	66.3107	12.9	41.07	0	0.01	0	0.01	0	0.01	0	38.28	0	0.01	0	0.01	0	66.8611	13.2	655.12	1	2.99	0	0.11	0	2.38	0	0.5	0	3.7	0	4.23	0	67.3073	13.2	13029	1	0.01	0	0.01	0	0.01	0	11.46	0	0.01	0	0.01	0
207049509	2	20.6954	13.2	631.2	1	0.01	0	0.01	0	0.01	0	0.01	0	0.01	0	0.01	0	21.2485	13.6	623.11	1	0.01	0	0.01	0	0.01	0	9.44	0	0.01	0	2.35	0	21.6701	14.5	4630.02	1	0.01	0	56.73	1	0.01	0	0.01	0	110.7	1	0.01	0
207051701	1	74.3491	15.2	11356.6	1	1.01	0	0.28	0	3.71	0	7.93	0	0.28	0	1.01	0	74.8611	15.9	649.71	1	1.14	0	1.65	0	2.38	0	0.93	0	4.78	0	0.01	0	75.3073	15.8	12743.7	1	0.01	0	0.01	0	0.01	0	0.01	0	0.01	0	0.01	0
207051705	2	24.2738	14.5	0.01	0	0.01	0	0.01	0	6.79	0	0.01	0	0.01	0	0.01	0	24.8268	15.7	2265.63	1	3.69	0	0.01	0	0.01	0	0.01	0	0.01	0	1.11	0	25.2512	14.9	4144.74	1	0.01	0	0.01	0	0.01	0	0.01	0	0.01	0	0.01	0
207051707	2	22.3107	12.2	0.01	0	0.01	0	0.01	0	0.01	0	0.01	0	0.01	0	0.01	0	22.861	14	480.81	1	1.24	0	0.01	0	2.59	0	0.76	0	2.2	0	0.01	0	23.2854	14.6	2844.8	1	135.71	1	0.01	0	0.01	0	0.01	0	0.01	0	0.01	0
207051708	1	8.17522	12.7	293.67	1	0.01	0	0.01	0	0.01	0	0.01	0	0.01	0	0.01	0	8.69268	12.8	375.93	1	0.01	0	0.01	0	0.01	0	0.01	0	0.01	0	2.58	0	9.1718	13.5	4472.58	1	12.75	0	0.01	0	3.99	0	0.01	0	0.01	0	0.74	0
207051905	2	28.3121	14.8	257.36	1	0.01	0	0.01	0	405.16	1	0.01	0	99.1	1	77.47	1	28.8624	13.9	156.34	1	1	0	0.01	0	3.2	0	0.01	0	2.7	0	0.5	0	29.2868	13.4	4320.68	1	0.01	0	0.01	0	0.01	0	0.01	0	0.01	0	0.01	0
207051906	2	9.47844	13	154.1	1	81.37	1	262.94	1	0.01	0	186.64	1	357.92	1	0.01	0	9.99589	13	417.94	1	3.74	0	3.35	0	10.56	0	4.57	0	3.32	0	2.48	0	10.4531	12.5	4095.62	1	0.01	0	5	0	175.75	1	16.23	0	30.37	0	60.62	1
207051907	2	6.23135	12.2	5.83	0	0.01	0	0.01	0	0.01	0	0.01	0	0.01	0	0.01	0	6.7488	10.6	1629.59	1	0.01	0	0.01	0	9.96	0	0.01	0	4.67	0	3.85	0	7.20602	12.5	2552.07	1	0.01	0	0.01	0	0.01	0	28.32	0	0.01	0	0.01	0
207052005	1	14.6913	15.2	587.03	1	0.01	0	24.07	0	141.1	1	0.01	0	457.92	1	0.01	0	15.2115	15.1	15164.7	1	0.01	0	0.01	0	0.01	0	26.73	0	0.01	0	0.01	0	15.6906	14.4	5160.57	1	0.01	0	0.01	0	4.39	0	0.01	0	0.01	0	3.25	0
207052007	2	7.49076	15.1	185.24	1	0.01	0	0.01	0	0.01	0	83.71	1	0.01	0	95.37	1	8.00821	15	3823.33	1	0.01	0	10.09	0	0.01	0	27.73	0	0.01	0	0.01	0	8.46543	14.2	3293.45	1	141.68	1	77.22	1	47.16	0	20.64	0	28.33	0	85.06	1
207052301	1	36.3258	16.5	21106.7	1	36.71	0	0.01	0	0.01	0	48.47	0	0.01	0	0.01	0	36.8624	19	2966.84	1	99.49	1	2.89	0	3.3	0	0.21	0	7.29	0	1.99	0	37.2868	17	26640.2	1	46.18	0	578.98	1	0.01	0	0.01	0	0.01	0	342.68	1
207052703	2	18.1492	12.8	415.19	1	0.01	0	23.92	0	12.97	0	40.62	0	21.51	0	17.54	0	18.7023	14.8	3112.52	1	0.01	0	0.01	0	0.01	0	7.56	0	0.88	0	0.01	0	19.1403	13.6	5014.1	1	1.31	0	0.01	0	0.01	0	0.8	0	0.01	0	0.01	0
207052704	1	14.2259	13.8	559.42	1	0.01	0	44.02	1	0.01	0	149.22	1	328.8	1	688.54	1	14.7433	14.1	1756.01	1	13.48	0	0.01	0	15.6	0	8.84	0	0.01	0	6.48	0	15.2225	14	6888.64	1	17.83	0	0.01	0	0.01	0	0.01	0	12.14	0	22.14	0
207052705	2	12.2272	15.4	333.06	1	0.01	0	8.02	0	268.11	1	0.01	0	0.01	0	6.36	0	12.7447	13.4	491.34	1	4.17	0	0.42	0	1.66	0	36.27	0	15.86	0	3.75	0	13.2019	14.5	5424.93	1	124.71	1	4.65	0	3.98	0	340.26	1	4.95	0	0.01	0
207052707	1	7.42231	12.3	896.74	1	1.4	0	0.01	0	0.01	0	0.01	0	0.01	0	14.05	0	7.93977	12.7	3795.61	1	0.01	0	0.01	0	0.01	0	0.01	0	0.01	0	0.01	0	8.41889	12.9	7217.03	1	1.92	0	0.01	0	0.01	0	0.01	0	0.01	0	4.48	0
207054102	1	32.9144	8.9	10769.6	1	1.75	0	0.01	0	4.11	0	15.19	0	3.31	0	0.28	0	33.4292	10.4	382.54	1	0.01	0	3.23	0	0.01	0	0.01	0	1.4	0	0.01	0	33.8508	13.9	24365.4	1	133.14	1	364.69	1	55.34	0	0.01	0	201.03	1	0.01	0
207700301	2	36.7775	14.2	243.38	1	0.01	0	116.75	1	0.01	0	0.01	0	0.01	0	0.01	0	37.3525	12.3	525.52	1	0.01	0	19.72	0	0.01	0	20.04	0	0.01	0	1.44	0	37.7741	13.6	553.93	1	0.01	0	0.01	0	9.01	0	0.01	0	0.01	0	0.01	0
207700601	2	58.2888	12	851.78	1	0.01	0	228.33	1	0.01	0	0.01	0	0.01	0	0.01	0	58.861	13.2	2085.07	1	6.82	0	0.38	0	1.12	0	10.2	0	2.85	0	0.66	0	59.2854	13.5	8216.45	1	0.01	0	0.14	0	0.01	0	1.92	0	0.01	0	0.01	0
207700604	2	17.8097	15	0.01	0	0.01	0	0.01	0	0.01	0	26.05	0	0.01	0	0.01	0	18.3491	14.6	4296.76	1	0.01	0	0.01	0	0.01	0	0.01	0	0.01	0	0.01	0	18.8282	14.3	16865.8	1	0.01	0	0.01	0	5.57	0	0.01	0	18.82	0	0.01	0
207701201	2	3.36482	10.8	1340.34	1	81.66	1	587.39	1	183.51	1	702.77	1	1061.81	1	428.9	1	3.88227	9.4	677.29	1	0.01	0	35.49	0	0.01	0	0.01	0	36.13	1	15.69	0	4.33949	12.4	3335.74	1	0.01	0	0.01	0	0.01	0	0.01	0	0.01	0	0.01	0
321000402	2	39.2882	13.6	1.45	0	0.01	0	0.01	0	0.01	0	19.76	0	4.66	0	3.49	0	39.8412	14.7	238.48	1	0.01	0	0.01	0	0.01	0	0.01	0	0.01	0	0.01	0	40.3039	14.2	6183.69	1	0.01	0	0.01	0	0.01	0	0.01	0	24.31	0	0.01	0
321001804	1	30.924	16.1	4525.29	1	170.52	1	11.48	0	64.34	0	71.48	1	0.01	0	38.98	1	31.4387	14.7	1971.63	1	2.5	0	0.01	0	10.16	0	0.84	0	0.01	0	1.25	0	31.9014	15.5	16547.1	1	0.01	0	0.01	0	0.01	0	0.01	0	0.01	0	109.98	1
321001811	2	26.3107	15.4	66.18	1	22.29	0	49.21	1	243.54	1	43.7	0	38.31	1	33.25	1	26.8638	15	3477.16	1	2.05	0	177.55	1	0.01	0	0.01	0	0.01	0	0.01	0	27.3265	14.6	14546.7	1	0.01	0	0.01	0	0.01	0	0.01	0	0.01	0	0.01	0
321002804	1	29.3251	15.7	255.68	1	74.91	1	0.01	0	0.01	0	20.62	0	10.99	0	16.04	0	29.8782	16.2	2471.66	1	0.01	0	1.2	0	1.2	0	30.1	0	0.01	0	0.4	0	30.3409	13.1	13905.3	1	0.01	0	0.01	0	24.18	0	0.01	0	228.01	1	0.01	0
322000901	1	43.8439	14.8	49.37	0	0.01	0	0.01	0	1.54	0	21.6	0	181.25	1	4.69	0	44.397	15.8	2913.32	1	0.81	0	2	0	8.23	0	7.35	0	2.41	0	3.62	0	44.8569	15.3	10523.4	1	11.82	0	0.01	0	0.01	0	2.42	0	6.31	0	3.42	0
322000902	2	34.3327	7.1	0.01	0	0.01	0	0.01	0	0.01	0	13.71	0	0.01	0	0.01	0	34.9049	7.6	856.91	1	0.01	0	0.01	0	0.01	0	0.01	0	0.87	0	0.01	0	35.3456	7.9	5599.98	1	3.25	0	0.01	0	0.01	0	2.16	0	0.21	0	14.99	0
322002203	1	35.0527	15.4	149.43	1	269.77	1	0.01	0	110.08	1	5.72	0	0.01	0	0.01	0	35.6058	16.7	23966.3	1	4.77	0	0.01	0	17.83	0	29.51	0	18.4	0	96.28	1	36.0684	14.8	7823.09	1	13.25	0	55.95	1	47.61	0	41.9	0	34.32	1	66.58	1
322002307	1	38.3107	15.8	1588.53	1	0.01	0	0.01	0	0.01	0	0.01	0	0.01	0	0.01	0	38.8638	16.9	39149	1	0.01	0	0.01	0	39.13	0	15.34	0	9.75	0	0.01	0	39.3265	15.6	11657	1	0.01	0	0.01	0	0.01	0	0.01	0	0.01	0	0.01	0
322002903	1	35.6496	17.9	183.27	1	0.01	0	0.01	0	0.01	0	0.01	0	0.01	0	0.01	0	36.1889	17.6	23343.8	1	0.01	0	0.01	0	0.01	0	0.01	0	28.63	0	0.01	0	36.6626	17.3	15243.9	1	13.76	0	1.16	0	8.34	0	23.86	0	3.58	0	10.59	0
322003102	2	58.2888	14	0.01	0	0.01	0	0.01	0	0.01	0	0.01	0	0.01	0	0.01	0	58.861	9.7	3343.89	1	0.01	0	506.41	1	0.01	0	0.01	0	2.32	0	0.01	0	59.3046	14.2	11158.6	1	0.01	0	0.01	0	0.01	0	0.01	0	0.01	0	0.01	0
322004801	2	45.3443	13.5	0.01	0	0.01	0	0.01	0	0.01	0	0.01	0	20.48	0	0.01	0	45.8973	13.2	8845.85	1	0.01	0	0.01	0	98.21	0	56.17	0	12.61	0	6.96	0	46.36	12.7	9254.02	1	0.01	0	0.01	0	0.01	0	72.59	1	0.01	0	0.01	0
322005603	2	29.4921	11	380.79	1	0.01	0	0.01	0	0.01	0	6.85	0	89.3	1	100.44	1	30.0616	13.2	2476.31	1	0.01	0	0.01	0	4.62	0	0.01	0	5.77	0	0.01	0	30.5051	12.9	4386.59	1	0.01	0	0.01	0	0.01	0	8.81	0	0.01	0	0.01	0
322007301	1	37.3826	14.2	4253.46	1	28.91	0	0.01	0	106.16	1	15.94	0	60.68	1	0.01	0	37.8973	17.6	3010.1	1	1.16	0	4.36	0	14.06	0	11.89	0	9.09	0	4.41	0	38.36	15.6	11607.9	1	45.45	0	3.91	0	2.05	0	30.54	0	53.18	1	2.93	0
322007503	1	33.807	14.4	0.01	0	0.01	0	0.01	0	0.01	0	11.39	0	0.01	0	0.01	0	34.36	16	19043.1	1	13.47	0	0.01	0	8.63	0	65.14	0	13.71	0	0.01	0	34.8227	15.6	4260.33	1	4.24	0	0.01	0	0.01	0	0.01	0	4.09	0	7.88	0
322008201	1	33.6673	14.1	5.51	0	0.01	0	136.21	1	0.01	0	11.92	0	0.01	0	0.01	0	34.2204	13.4	14620.1	1	0.01	0	0.01	0	16.37	0	2.33	0	3.31	0	0.01	0	34.6639	13.6	11336.1	1	0.01	0	0.01	0	0.01	0	4.9	0	0.01	0	0.01	0
322010101	2	28.0246	15.4	980.06	1	387.79	1	97.21	1	0.01	0	0.01	0	244.11	1	0.01	0	28.575	15.5	15993.6	1	13.32	0	0.01	0	79.93	0	38.07	0	25.6	0	0.01	0	29.0376	15.8	16967.7	1	6.54	0	0.01	0	1.03	0	10.97	0	0.01	0	0.01	0
323003703	1	19.551	14.9	19194.7	1	0.01	0	0.01	0	97.54	0	13.13	0	0.01	0	0.01	0	20.0876	15.8	2785.12	1	0.01	0	0.02	0	2.69	0	1.98	0	19.91	0	2.07	0	20.5284	16.1	8.35	0	6.86	0	13.62	0	1.87	0	12.22	0	0.01	0	0.01	0
323004001	1	76.3066	15.3	3831.18	1	0.01	0	60.54	1	179.42	1	124.76	1	16.75	0	2	0	76.8433	14.8	12075	1	0.01	0	0.01	0	3.02	0	0.01	0	0.01	0	14.74	0	77.3032	13.3	5104.89	1	1.55	0	0.01	0	0.01	0	0.01	0	0.01	0	6.1	0
324000703	1	31.4004	15.4	18870.8	1	33.13	0	254.41	1	0.01	0	0.01	0	398.69	1	170.37	1	31.9014	16.6	2221.1	1	0.01	0	0.01	0	0.01	0	0.01	0	0.01	0	0.01	0	32.3587	15.6	9736.43	1	0.01	0	0.01	0	0.01	0			91.08	1	33.03	1
324001201	2	34.4093	14.5	19451.4	1	0.01	0	394.22	1	0.01	0	548.08	1	0.01	0	58.2	1	34.9076	12	15446	1	0.36	0	0.01	0	0.01	0	2.28	0	2.91	0	10.4	0	35.3676	15.3	5167.11	1	28.43	0	0.01	0	0.01	0			27.99	0	0.01	0
324001603	1	31.3046	15	19784.9	1	0.01	0	0.01	0	0.01	0	0.01	0	4374.79	1	0.01	0	31.8029	17	15774.8	1	0.01	0	0.01	0	8.06	0	613.28	1	0.01	0	0.01	0	32.2628	16.1	12544.2	1	0.01	0	0.01	0	0.01	0			100	1	0.01	0
324004201	1	34.0424	17.3	21639.8	1	0.01	0	32.19	0	38.75	0	34.38	0	3.22	0	133.99	1	34.5435	18.4	2221.1	1	0.01	0	0.01	0	0.01	0	0.01	0	0.01	0	0.01	0	35.0007	18.6	12149.8	1	0.01	0	1.98	0	0.01	0			244.25	1	5.35	0
324004202	2	29.191	14.8	3396.69	1	208.56	1	27.12	0	0.01	0	41.9	0	102.37	1	10.47	0	29.7029	15.3	13947.2	1	0.01	0	0.01	0	15.22	0	27.48	0	33.6	1	43.07	1	30.1629	16.4	11573.6	1	83.63	1	0.01	0	32.93	0	4.59	0	100.42	1	0.01	0
324004203	1	9.13347	14.1	28592.2	1	526.85	1	0.01	0	1616.92	1	0.01	0	885.83	1	569.64	1	9.64545	13.9	31133.5	1	44.11	0	45.36	1	39.14	0	0.01	0	84.11	1	79.12	1	10.1054	14.6	1775.07	1	0.01	0	0.01	0	13.79	0	33.41	0	0.01	0	0.01	0
324004204	1	6.32444	13.4	549.56	1	0.01	0	0.01	0	80.96	0	16.7	0	0.01	0	87.05	1	6.83641	13.4	10334.4	1	8.02	0	664.95	1	0.01	0	327.81	1	70.32	1	10.51	0	7.29637	13	89.33	1	0.01	0	0.01	0	0.01	0	0.01	0	0.01	0	0.01	0
324004205	1	3.63587	13.6	1072.8	1	0.01	0	0.01	0	5.02	0	0.01	0	54.33	1	0.01	0	4.14784	13	27781.2	1	308.82	1	0.01	0	0.01	0	0.01	0	36.67	1	94.25	1	4.6078	13.1	1486.45	1	0.01	0	0.01	0	0.01	0	0.01	0	0.01	0	0.01	0
324004307	1	45.2375	14.8	14714.5	1	180.31	1	0.01	0	67.7	0	118.67	1	0.01	0	0.01	0	45.7358	14.5	16107.8	1	0.01	0	67.35	1	0.01	0	0.01	0	0.01	0	129.44	1	46.2204	11.4	12089.9	1	0.01	0	0.01	0	0.01	0	0.01	0	0.01	0	0.01	0
324004601	1	74.475	13.8	12161.7	1	0.01	0	0.01	0	0.01	0	0.01	0	0.01	0	0.01	0	74.9733	15.3	15979.9	1	0.01	0	3.76	0	28.54	0	31.26	0	0.01	0	0.01	0	75.4333	15	9089.14	1	0.01	0	0.01	0	0.06	0			6.01	0	0.01	0
324004602	2	60.3258	13.1	18215	1	0.01	0	0.01	0	0.01	0	14.78	0	410.34	1	2874.5	1	60.8241	14.2	25911.9	1	0.01	0	0.01	0	38.22	0	45.7	0	29.97	0	34.12	1	61.2841	13.4	11766	1	0.01	0	0.01	0	0.01	0			80.25	1	0.01	0
324004604	1	28.2382	17.4	18960.3	1	0.01	0	307.28	1	0.01	0	41.03	0	809.24	1	915.08	1	28.7392	16.6	2221.1	1	0.01	0	0.01	0	0.01	0	0.01	0	0.01	0	0.01	0	29.2019	16.8	12546	1	0.01	0	0.01	0	0.01	0	94.67	1	4.05	0	26.64	0
324004605	2	24.6105	9.3	17272.6	1	0.01	0	0.01	0	0.01	0	0.01	0	0.01	0	75.68	1	25.1116	11.7	2221.1	1	0.01	0	0.01	0	0.01	0	0.01	0	0.01	0	0.01	0	25.5688	13	9311.16	1	0.01	0	0.01	0	0.01	0			0.01	0	3.46	0
324004607	1	18.2149	14.4	15728.8	1	0.01	0	41.6	0	0.01	0	0.01	0	312.72	1	46.3	1	18.7159	13.2	16771.8	1	8.03	0	5.61	0	3.57	0	0.74	0	10.14	0	0.01	0	19.1732	15.3	982.03	1	0.01	0	0.01	0	0.01	0					0.01	0
324004610	2	22.8173	12.8	14015.6	1	341.77	1	0.01	0	0.01	0	34.29	0	2811.34	1	128.22	1	23.3155	9	7061.29	1	0.01	0	0.01	0	5.33	0	2.7	0	0.01	0	0.01	0	23.7755	13.7	5617.24	1			0.01	0
324005402	2	42.9925	13.4	9899.54	1	0.01	0	23.73	0	0.01	0	0.01	0	78.74	1	0.01	0	43.4935	14.9	16699.7	1	9.1	0	0.25	0	14.01	0	2.54	0	17.81	0	0.96	0	43.9507	15.3	0.01	0	0.38	0	0.01	0	1.08	0	0.01	0	18.5	0	0.34	0
324005406	1	9.23751	12.8	3150.99	1	34.17	0	625.59	1	481.16	1	221.06	1	28.77	0	0.01	0	9.7358	11.7	486.21	1	0.01	0	0.01	0	0.01	0	105.17	1	0.01	0	0.01	0	10.1958	12.6	740.02	1	34.31	0	0.01	0	0.01	0	4.33	0	0.01	0	0.55	0
324005901	1	31.488	16.1	15650.2	1	0.01	0	109.68	1	49.71	0	219.45	1	1783.79	1	62.67	1	31.9863	16.8	20699.6	1	48.27	0	0.01	0	10.21	0	0.01	0	64.63	1	0.01	0	32.4709	15.6	14253.8	1	0.01	0	0.01	0	0.01	0	0.01	0	0.01	0	0.01	0
324005902	2	28.2382	13.3	10409.8	1	0.01	0	0.01	0	0.01	0	0.01	0	0.01	0	0.01	0	28.7365	13	17248.3	1	0.01	0	23.21	0	5.82	0	26.72	0	0.01	0	0.01	0	29.1964	12.7	7925.33	1	0.01	0	0.01	0	0.01	0	0.01	0	0.01	0	1.72	0
324005903	2	7.718	12.5	642.14	1	0.01	0	0.01	0	0.01	0	0.01	0	0.01	0	0.01	0	8.21629	12.6	3604.01	1	74.6	1	497.72	1	16.08	0	248.91	1	3.39	0	570.79	1	8.67625	12.8	490.68	1	0.01	0	0.01	0	0.01	0	18.71	0	9.79	0	0.01	0
324005904	2	6.03148	12	5849.95	1	0.01	0	0.01	0	0.01	0	16.97	0	0.01	0	0.01	0	6.52977	12.2	2558.13	1	22.47	0	0.01	0	0.01	0	0.01	0	4.76	0	0.01	0	6.98973	12	2329.7	1	0.01	0	16.98	0	1.61	0	7.36	0	49.34	1	7.52	0
324005906	1	3.40862	12.9	1581.26	1	0.01	0	0.96	0	15.92	0	37.91	0	0.01	0	0.01	0	3.90691	12	522.33	1	6.39	0	3.94	0	4.67	0	111.18	1	4.8	0	4.74	0	4.36687	14.5	180.25	1	0.01	0	0.01	0	0.01	0	0.01	0	0.01	0	32.33	1
324006501	1	34.0151	16.3	15770.5	1	68.52	1	26.58	0	108.12	1	22.13	0	744.74	1	76.3	1	34.5134	17.1	25818.8	1	0.01	0	45.24	1	0.01	0	0.01	0	0.01	0	0.01	0	34.9733	17.2	3145.76	1	0.01	0	0.01	0	3.85	0			0.01	0	0.01	0
324006503	2	8.32307	14.1	4818.11	1	0.01	0	0.01	0	0.01	0	0.01	0	0.01	0	0.01	0	8.82136	14.2	1939.26	1	0.01	0	0.01	0	0.01	0	15.68	0	3.8	0	0.01	0	9.28131	13.4	4820.51	1	0.01	0	45.53	1	0.01	0	0.01	0	0.01	0	0.01	0
324006505	1	4.89254	13.2	6170.16	1	0.01	0	0.01	0	0.01	0	0.01	0	0.01	0	0.01	0	5.39357	12.7	1736.83	1	0.01	0	0.01	0	11.03	0	15.04	0	0.01	0	0.01	0	5.85079	13.2	1222.41	1	0.01	0	0.01	0	0.01	0	0.01	0	0.01	0	0.01	0
324008001	1	39.8987	17.1	9094.43	1	0.01	0	8.08	0	6.61	0	15.64	0	333.49	1	46.51	1	40.3997	16.1	16938.9	1	0.01	0	0.85	0	4.56	0	26.64	0	4.02	0	21.77	0	40.8597	15.5	10627.9	1	0.01	0	0.01	0	0.01	0	4.84	0	39.61	1	0.01	0
324008002	2	33.9576	15.5	963.72	1	0.01	0	0.01	0	0.01	0	0.01	0	0.01	0	0.01	0	34.4723	15.1	17746.6	1	0.01	0	0.01	0	0.01	0	0.01	0	0.01	0	0.01	0	34.9322	16.1	9688.11	1	0.01	0	0.01	0	0.01	0	0.01	0	0.01	0	0.01	0
324008004	1	8.12868	14.9	45.09	0	0.53	0	2.61	0	3.92	0	20.9	0	0.01	0	1.75	0	8.64066	14.4	7700.78	1	105.65	1	0.01	0	0.01	0	0.01	0	3.52	0	9.17	0	9.10335	14.7	952.08	1	0.01	0	0.01	0	0.01	0	0.01	0	0.01	0	0.01	0
324008005	1	5.03217	13.5	94.85	1	7.7	0	0.01	0	16.53	0	28.41	0	6.38	0	4.28	0	5.54415	13.4	6142.94	1	3.52	0	0.01	0	0.01	0					21.9	0	6.00685	13.6	700.28	1	0.01	0	49.13	1	4.69	0	0.01	0	6.69	0	0.01	0
324008901	1	65.7906	13.5	19172.5	1	0.01	0	0.01	0	203.08	1	0.01	0	320.07	1	0.01	0	66.3299	14.9	3320.99	1	4.38	0	6.14	0	2.56	0	0.39	0	15.74	0	3.66	0	66.7515	14.9	5001.25	1	0.01	0	0.01	0	0.01	0	0.01	0	0.01	0	0.01	0
324008902	2	54.7242	12.8	12596.9	1	0.01	0	0.01	0	0.01	0	11.34	0	0.01	0	0.01	0	55.2252	13.2	12378.6	1	1.31	0	0.01	0	24.04	0	0.01	0	27.16	0	4.33	0	55.6852	13.5	5001.25	1	0.01	0	0.01	0	0.01	0	0.01	0	0.01	0	0.01	0
324009301	1	51.3867	16.7	10154.5	1	0.01	0	0.01	0	0.01	0	0.01	0	0.01	0	0.01	0	51.8877	15.9	10733.9	1	0.01	0	0.01	0	22.03	0	0.01	0	3.43	0	18.32	0	52.3477	17.8	5001.25	1	0.01	0	0.01	0	0.01	0	0.01	0	0.01	0	0.01	0
324009302	2	35.7043	12.1	10618.6	1	18.24	0	2.14	0	14.44	0	7.04	0	693.92	1	141.25	1	36.2053	13.2	13135	1	0.93	0	6.65	0	8.24	0	263.91	1	8.93	0	2.42	0	36.6872	11.2	16111	1	0.01	0	0.01	0	0.01	0					0.01	0
324009305	1	14.0014	15.3	10961.4	1	0.01	0	0.01	0	0.01	0	263.42	1	0.01	0	0.01	0	14.4997	16.4	8367.15	1	166.14	1	46.33	1	0.01	0					514.89	1	14.9596	16.5	1280.81	1	0.01	0	0.01	0	0.01	0	0.01	0	0.01	0	0.01	0
324009307	1	9.6783	15.1	2464.45	1	55.02	1	0.01	0	23.11	0	272.72	1	1.77	0	58.59	1	10.1766	15.5	3833.07	1	0.01	0	0.01	0	0.01	0	0.01	0	0.01	0	0.01	0	10.6393	14.5	641.58	1	0.01	0	0.01	0	0.01	0	0.01	0	0.01	0	0.01	0
324010701	2	32.7693	13.1	30767.8	1	0.52	0	331.98	1	9.5	0	14.51	0	257.8	1	0.01	0	33.2676	13.8	227.41	1	0.01	0	0.01	0	0.01	0	294.89	1	0.01	0	0.01	0	33.7249	14.1	5037.69	1	0.01	0	0.01	0	0.01	0			0.01	0	0.01	0
324010703	1	4.83504	12.6	2444.1	1	0.01	0	0.3	0	2.65	0	0.01	0	0.01	0	0.01	0	5.33059	9	1152.16	1	0.01	0	0.01	0	0.01	0	0.01	0	0.01	0	0.01	0	5.79056	12.7	42.66	0	0.01	0	0.01	0	0.01	0	13.79	0	0.01	0	0.01	0
324011702	1	3.48802	13.3	3.37	0	0.01	0	0.01	0	0.02	0	4.41	0	0.01	0	0.01	0	4	12.9	668.33	1	0.01	0	0.01	0	0.01	0					0.01	0	4.4627	12.2	154.45	1	14.99	0	0.01	0	0.01	0	79.05	1	0.01	0	181.8	1
325000201	1	36.3806	13.8	181.04	1	0.01	0	22.93	0	0.01	0	32.99	0	0.01	0	19.37	0	36.9336	16.4	2244.07	1	18.53	0	90.14	1	8.03	0	5.66	0	20.79	0	642.6	1	37.3552	14.4	20190.3	1	0.01	0	204.6	1	0.01	0	0.01	0	100.6	1	329.81	1
325001702	2	46.8857	12.9	1290.68	1	0.01	0	0.01	0	127.32	1	0.01	0	0.01	0	0.01	0	47.4031	13.3	37127	1	0.01	0	0.01	0	0.01	0	0.01	0	0.01	0	0.01	0	47.8631	12.1	7542.34	1	0.01	0	0.01	0	0.01	0	0.01	0	0.01	0	121.9	1
325001704	2	20.7118	12.5	4177.03	1	0.01	0	46.29	1	0.01	0	2.23	0	106.57	1	0.01	0	21.2101	15.4	582.91	1	0.01	0	0.01	0	0.01	0	210.23	1	0.01	0	0.01	0	21.692	13.3	10831	1	0.01	0	0.01	0	0.01	0			0.01	0	0.01	0
325001705	2	19.0281	14.1	397.23	1	3.94	0	11.59	0	10.34	0	29.68	0	141.96	1	42.38	1	19.5455	11.3	16203.1	1	0.01	0	0.01	0	0.01	0	11.76	0	1.67	0	0.01	0	20.0055	14	7890.9	1	0.01	0	0.01	0	0.01	0	0.01	0	119.76	1	0.01	0
325001706	2	16.7228	12.2	1375.1	1	10.35	0	282.04	1	0.01	0	0.01	0	1.86	0	32.74	1	17.2402	13.2	45082.1	1	0.01	0	0.01	0	0.01	0	0.01	0	1.67	0	3.3	0	17.7194	12.4	14779.1	1	0.01	0	0.01	0	0.01	0	1.51	0	0.01	0	0.01	0
325001708	2	11.6961	14.4	85.02	1	2.85	0	0.01	0	0.01	0	7.16	0	0.01	0	0.01	0	12.2135	14.9	164.07	1	0.01	0	30.41	0	0.01	0	22.55	0	4.98	0	37.96	1	12.6735	11.3	5302	1	0.01	0	0.01	0	0.01	0	7.22	0	0.01	0	2.02	0
325001709	2	9.03217	11.6	0.01	0	0.01	0	0.01	0	0.01	0	0.01	0	0.01	0	0.01	0	9.54688	12.2	2333.68	1	0.01	0	0.01	0	0.01	0	0.01	0	0.01	0	0.01	0	10.0096	11.9	126.89	1	0.01	0	0.01	0	0.01	0	1.5	0	141.47	1	14.82	0
325003501	1	55.4114	17.2	105.56	1	0.01	0	0.01	0	0.01	0	0.01	0	0.01	0	0.01	0	55.9644		671.61	1	0.01	0	0.01	0	0.01	0	0.01	0	0.01	0	0.01	0	56.386	16.3	20870.7	1	0.01	0	0.01	0	0.01	0	0.68	0	0.68	0	9.84	0
325003502	2	46.0589	13.4	740.91	1	0.01	0	9.19	0	0.01	0	0.01	0	239.26	1	0.01	0	46.5763	10.1	34630.1	1	0.01	0	0.01	0	14.35	0	34.78	0	4.79	0	1.67	0	47.0363	10.6	0.01	0	0.01	0	0.01	0	53.47	0	0.01	0	179.64	1	0.01	0
325003508	2	13.7276	16.2	0.01	0	0.01	0	0.01	0	0.01	0	0.01	0	244.25	1	0.01	0	14.245	15.7	3273.91	1	0.01	0	0.01	0	0.01	0	59.07	0	0.01	0	0.01	0	14.705	15.4	17850.3	1	139.7	1	85.37	1	799.83	1	66.79	0	421.98	1	76.07	1
325004401	1	42.8966	15.9	861.1	1	41.15	0	0.01	0	65.02	0	190.43	1	293.61	1	0.01	0	43.4141	16.8	2285.36	1	0.01	0	0.01	0	0.01	0	18.74	0	16.92	0	5.91	0	43.8713	9.8	21799.5	1	0.01	0	0.01	0	0.01	0	9.38	0	0.01	0	14.88	0
325004403	2	16.9774	10.7	85.34	1	0.01	0	0.01	0	0.01	0	0.01	0	0.01	0	0.01	0	17.4976	11.1	80776	1	0.01	0	0.01	0	0.01	0	0.01	0	0.01	0	27.63	1	17.9548	10.6	17997.4	1	0.01	0	70.43	1	0.01	0	0.01	0	0.01	0	0.01	0
325004404	2	14.7406	10	0.01	0	0.01	0	0.01	0	0.01	0	11.39	0	0.01	0	0.01	0	15.258	11.8	452.68	1	0.01	0	0.01	0	15.16	0	0.01	0	2.42	0	15.76	0	15.718	12.1	17356.1	1	0.01	0	0.01	0	0.01	0	0.01	0	0.01	0	0.01	0
325004405	1	12.3477	12.6	137.68	1	0.01	0	0.01	0	0.01	0	0.01	0	0.01	0	0.01	0	12.8624	13.1	1162.86	1	0.01	0	0.01	0	0.01	0	0.01	0	0.01	0	0.01	0	13.3251	12.2	14.82	0	0.01	0	5.85	0	0.01	0	0.01	0	0.01	0	0.01	0
325004406	1	8.69815	12.7	6.41	0	0.01	0	0.01	0	0.01	0	12.09	0	0.01	0	1.63	0	9.21561	13.2	4716.63	1	0.01	0	0.01	0	0.01	0	8.92	0	2.98	0	0.5	0	9.67557	12.3	1312.43	1	7.94	0	0.01	0	0.01	0	0.01	0	0.01	0	0.01	0
325004601	2	81.9959	13.7	747.04	1	1.88	0	2.82	0	0.01	0	30.5	0	112.79	1	1.98	0	82.5133	13.4	8279.2	1	0.96	0	0.01	0	0.01	0	65.57	0	0.01	0	0.01	0	82.9733	13.6	1821.97	1	2.15	0	6.42	0	0.01	0	158.25	1	502.55	1	17.12	0
325004801	1	42.9733	14.5	224.36	1	148.39	1	138.87	1	0.01	0	0.01	0	128.79	1	75.49	1	43.488	15.5	582.91	1	0.01	0	0.01	0	0.01	0	0.01	0	0.01	0	0.01	0	43.948	13.9	93954.3	1	211	1	205.07	1	122.17	1	91.73	1	0.01	0	48.66	1
325004802	2	39.6961	15.5	21.43	0	0.62	0	0.01	0	0.01	0	12.42	0	7.37	0	0.01	0	40.2163	14.9	1231.66	1	0.01	0	0.01	0	0.01	0	0.01	0	0.01	0	0.01	0	40.6763	14.9	718.53	1	0.01	0	0.01	0	556.01	1	124.04	1	0.01	0	2.15	0
325004803	1	20.4873	17.4	1.64	0	4.94	0	0.01	0	0.01	0	8.32	0	0.01	0	0.01	0	21.0075	17.4	234.35	1	6.89	0	0.01	0	33.49	0	9.14	0	0.01	0	38.19	1	21.4675	15.5	641.55	1	0.01	0	0.01	0	498.27	1	106.93	1	0.01	0	4.29	0
325004805	1	15.0171	17	0.01	0	0.01	0	9.59	0	0.01	0	0.01	0	0.01	0	0.01	0	15.5346	17.7	907.66	1	0.01	0	5.02	0	7.98	0	3.03	0	19.88	0	2.04	0	15.9945	17.1	30791.1	1	0.01	0	0.01	0	0.01	0	0.01	0	1.68	0	112.59	1
325004806	1	8.18891	14.2	151.3	1	0.01	0	0.01	0	0.01	0	177.66	1	4.96	0	0.01	0	8.70637	15.5	865.8	1	0.01	0	0.01	0	0.01	0	3.48	0	0.01	0	0.01	0	9.16633	12.7	324.64	1	0.01	0	0.01	0	0.01	0	21.45	0	0.01	0	0.01	0
326001505	2	12.5859	13.7	12.31	0	0.01	0	0.01	0	33.45	0	0.01	0	0.28	0	0.01	0	13.1061	11.3	3308.03	1	9.33	0	0.01	0	4.18	0	2.78	0	0.01	0	3.71	0	13.5661	11.3	254.14	1	0.01	0	0.01	0	0.01	0	0.01	0	0.01	0	0.01	0
326002602	2	48.5257	14.4	921.02	1	0.01	0	0.01	0	100.19	0	0.01	0	330.74	1	0.01	0	49.0623	14.4	1908.99	1	0.01	0	26.31	0	0.01	0	71.65	1	0.01	0	460.7	1	49.5222	15.4	15172.9	1	0.01	0	0.01	0	0.01	0	0.01	0	0.01	0	0.01	0
326002603	1	25.6893	13.6	17989.3	1	0.01	0	0.01	0	0.01	0	0.01	0	0.01	0	0.01	0	26.2067	15.4	2070.16	1	0.63	0	0.01	0	1.99	0	52.13	0	3.68	0	0.01	0	26.6448	16.2	5077.99	1	0.01	0	70.05	1	0.01	0	0.01	0	0.01	0	0.01	0
326003003	1	30.8227	14.9	26462.5	1	0.01	0	0.01	0	0.01	0	120.86	1	400.44	1	0.01	0	31.3374	14.2	4961.1	1	188.28	1	0.01	0	0.01	0	0.01	0	0.01	0	0.01	0	31.7974	16.3	7707.39	1	12.09	0	3.59	0	0.01	0	0.01	0	7.59	0	11.17	0
326004201	2	73.3059	14.1	604.1	1	0.01	0	0.01	0	0.01	0	0.01	0	0.01	0	107.6	1	73.8645	14.6	2519.04	1	0.01	0	0.01	0	0.01	0	2.77	0	0.84	0	0.01	0	74.3025	14	11965	1	2.79	0	0.01	0	0.01	0	12.65	0	11.32	0	0.01	0
326004203	2	24.0438	15.5	14.52	0	1.04	0	0.01	0	0.11	0	11.51	0	4.07	0	0.01	0	24.564	14.9	10062.9	1	0.01	0	0.01	0	0.01	0	0.01	0	0.01	0	0.01	0	25.0376	15.6	6318.29	1	0.01	0	0.01	0	0.01	0	0.01	0	0.01	0	0.01	0
326004308	2	6.59822	12.4	92.01	1	0.01	0	98.65	1	75.74	0	15.21	0	117.89	1	98.99	1	7.13484	12.5	781.19	1	0.01	0	1.3	0	15.66	0	12.57	0	3.98	0	1	0	7.5948	8.4	3.75	0	0.01	0	0.01	0	0.01	0	0.27	0	0.01	0	1.81	0
326004309	2	3.92882	12.4	0.01	0	0.01	0	0.01	0	0.01	0	0.01	0	0.01	0	0.01	0	4.46544	10.8	623.47	1	0.01	0	0.01	0	6.74	0	2.94	0	1.23	0	3.91	0	4.92539	11.5	35.59	0	0.01	0	0.01	0	0.01	0	7.06	0	0.01	0	0.01	0
326004501	1	57.8125	11.6	2022.7	1	231.85	1	0.01	0	0.01	0	0.01	0	0.01	0	0.01	0	58.3491	13.8	220.52	1	25.14	0	0.01	0	10.77	0	0.91	0	12.38	0	0.01	0	58.809	14	13352.6	1	0.01	0	0.01	0	0.01	0	0.01	0	0.01	0	0.01	0
326004502	2	46.1903	13.5	0.01	0	0.01	0	0.01	0	1044.39	1	0.01	0	715.14	1	0.01	0	46.7269	15.7	10439.7	1	0.01	0	0.01	0	10.38	0	0.03	0	13.94	0	0.01	0	47.1869	14.9	38408.4	1	51.42	1	0.01	0	5.41	0	1.26	0	0.01	0	9.72	0
326004504	2	18.36	10.2	434.12	1	0.01	0	0.01	0	0.01	0	32.84	0	0.01	0	0.01	0	18.8556	11	244.44	1	9.42	0	0.01	0	8.67	0	3.3	0	29.41	0	0.01	0	19.3155	12.2	3222.27	1	0.01	0	0.01	0	0.01	0	0.01	0	0.01	0	0.01	0
326004505	2	16.0465	14.6	2389.25	1	0.01	0	0.01	0	0.01	0	30.8	0	0.01	0	0.01	0	16.5421	15.5	28.32	0	0.01	0	0.01	0	0.01	0	0.76	0	0.01	0	5.66	0	17.0021	15	4859.44	1	0.01	0	0.01	0	0.01	0	0.01	0	0.01	0	0.01	0
326004506	1	13.7166	14.5	219.43	1	326.9	1	115.58	1	0.01	0	37.32	0	0.01	0	162.44	1	14.2396	11.3	65.82	1	0.01	0	0.01	0	6.15	0	7.51	0	0.01	0	5.15	0	14.7132	14.6	17.32	0	0.01	0	0.01	0	0.01	0	0.01	0	0.01	0	0.01	0
326005101	1	58.8966	15.1	0.01	0	0.01	0	0.01	0	0.01	0	9.86	0	3.5	0	0.01	0	59.447	15.4	4187.26	1	0.01	0	0.01	0	8.59	0	2.53	0	4.72	0	0.01	0	59.9069	15.4	4567.21	1	0.01	0	0.01	0	0.01	0	0.01	0	0.01	0	0.01	0
326005102	2	50.7981	9.4	472.27	1	112.48	1	31.73	0	340.17	1	15.13	0	392.35	1	0.01	0	51.3347	10.8	3859.44	1	0.01	0	119.76	1	0.01	0	0.01	0	0.01	0	0.01	0	51.7947	9.9	5378.82	1	0.01	0	0.01	0	0.01	0	0.01	0	0.01	0	0.01	0
326005103	2	30.0452		840.7	1	47.56	0	1922.65	1	4961.99	1	1708.17	1	1210.99	1	205.62	1	30.5818	10.8	3865.41	1	6.57	0	0.01	0	1.81	0	28.52	0	0.01	0	0.01	0	31.0281	10.7	735.64	1	0.01	0	331.47	1	2431.43	1	0.01	0	532.49	1	0.01	0
326005108	1	14.256	13.4	374.43	1	0.01	0	2.68	0	0.01	0	0.01	0	238.29	1	58.67	1	14.7734	14.4	819.26	1	0.01	0	0.01	0	0.01	0	0.01	0	0.01	0	0.01	0	15.2334	13.3	27316.3	1	0.01	0	0.01	0	0.01	0	0.01	0	0.01	0	0.01	0
326006404	1	14.7789	13.7	0.01	0	197.2	1	0.01	0	280.95	1	98.19	1	0.01	0	19.17	0	15.3155	11.9	307.86	1	168.82	1	0.01	0	9.94	0	18.47	0	4.22	0	0.01	0	15.7919	14.5	11690.8	1	0.01	0	126.97	1	10.58	0	0.01	0	0.01	0	10.28	0
326007601	2	27.4798	12.1	1176.97	1	29.32	0	0.01	0	0.01	0	0.01	0	560.34	1	0.01	0	28.0164	15.4	3872.03	1	0.01	0	0.01	0	8.43	0	0.01	0	0.01	0	0.01	0	28.4764	15	11468.6	1	0.01	0	0.01	0	0.01	0	0.01	0	0.01	0	0.01	0
326007602	1	3.35661	9.9	0.01	0	4519.7	1	0.01	0	0.01	0	0.01	0	0.01	0	202.06	1	3.89322	12.1	3992.36	1	0.01	0	0.01	0	0.01	0	0.01	0	0.01	0	0.01	0	4.35318	12.5	0.01	0	0.01	0	0.01	0	0.01	0	0.01	0	0.01	0	6.64	0
327000402	2	68.3094	12.8	421.77	1	0.01	0	4.71	0	0.01	0	6.81	0	0.01	0	0.01	0	68.8296	7.6	16274.8	1	7.19	0	0.01	0	0.01	0	0.01	0	0.01	0	17.83	0	69.2895	12.3	2711.57	1	57.75	1	0.01	0	10.7	0	2.15	0	42.78	1	19.26	0
327000603	1	8.33402	13.4	57.44	1	0.01	0	0.01	0	0.01	0	4.61	0	6.24	0	0.01	0	8.85421	14.1	128.81	1	0.01	0	0.01	0	5.98	0	0.02	0	3.61	0	0.78	0	9.31417	15.1	20.96	0	0.01	0	0.01	0	4.72	0	0.14	0	6.56	0	0.01	0
327000604	1	8.33402	12	24.78	0	0.01	0	0.01	0	0.01	0	14.15	0	0.01	0	0.01	0	8.85421	12	556.29	1	0.01	0	0.01	0	10.2	0	20.94	0	0.01	0	7.9	0	9.31417	12.5	433.87	1	0.01	0	0.01	0	0.01	0	0.01	0	0.01	0	0.01	0
327000605	1	6.45585	13.2	3.24	0	0.01	0	0.01	0	0.01	0	7.69	0	7.17	0	4.33	0	6.97604	12.2	2454.51	1	79.02	1	0.01	0	8.77	0	1.38	0	48.04	1	1848.49	1	7.436	13.3	15.47	0	0.01	0	0.01	0	0.01	0	0.01	0	0.01	0	0.01	0
327000707	2	13.9165	11.4	0.01	0	0.01	0	0.01	0	2.3	0	1.43	0	6.74	0	0.86	0	14.4339	12	1743.71	1	0.01	0	0.01	0	0.01	0	7.03	0	0.01	0	0.01	0	14.8939	12.3	21626.7	1	0.01	0	0.01	0	0.01	0	0.01	0	94.06	1	0.01	0
327000801	2	52.6981	9.6	6.64	0	0.01	0	0.01	0	0.01	0	3.59	0	0.01	0	0.01	0	53.2183	10.6	300.87	1	0.01	0	0.01	0	0.01	0	13.5	0	48.09	1	0.01	0	53.6783	9.6	2955.35	1	0.01	0	0.01	0	0.01	0	0.01	0	0.01	0	0.01	0
327000804	2	15.6496	12	0.01	0	0.01	0	0.01	0	0.01	0	0.01	0	0.01	0	0.01	0	16.167	10.1	1746.17	1	0.01	0	0.01	0	0.01	0	0.01	0	0.01	0	0.01	0	16.627	9	35164.7	1	0.01	0	0.01	0	0.01	0	0.01	0	12.43	0	24.2	0
327000805	2	10.9021	13.4	14.92	0	0.01	0	0.01	0	0.01	0	0.01	0	0.01	0	0.01	0	11.4196	13.7	11564.4	1	0.01	0	0.01	0	0.01	0	0.01	0	0.01	0	0.01	0	11.8823	12.8	25.77	0	0.01	0	0.01	0	0.01	0	0.01	0	0.01	0	0.01	0
327001702	2	24.6461	14	157.1	1	0.01	0	43.34	1	0.01	0	0.01	0	49.25	1	0.01	0	25.1964	13.8	3864.81	1	0.01	0	0.01	0	0.01	0	4.76	0	2.97	0	0.01	0	25.6564	13	4620.92	1	0.01	0	0.01	0	0.01	0	0.01	0	0.01	0	0.01	0
327004901	1	40.4956	16.3	3244.35	1	20.03	0	118.24	1	138.02	1	43.27	0	115.27	1	451.78	1	41.0322	15.5	901.98	1	0.01	0	0.01	0	6.95	0	5.08	0	1.17	0	2.07	0	41.4921	15	50688.8	1	5.65	0	0.01	0	0.01	0	22.07	0	16.97	0	0.01	0
327004902	2	38.3381	11.6	612.75	1	112.05	1	0.01	0	124.69	1	90.29	1	0.01	0	0.01	0	38.8884	11.2	5006.64	1	7.36	0	5.18	0	8.06	0	0.01	0	19.14	0	3.42	0	39.3347	11.7	662.93	1	0.01	0	299.39	1	2179.09	1	0.01	0	487.58	1	0.01	0
327005401	1	62.3792	17	1158.65	1	7.82	0	6125.02	1	164.43	1	7.75	0	102.26	1	33.45	1	62.9295	15.9	4997.11	1	0.01	0	0.01	0	3.37	0	7.59	0	1.1	0	0.01	0	63.3895	16.9	47461.4	1	0.01	0	0.01	0	0.01	0	23.93	0	0.01	0	0.01	0
327005402	2	53.6591	16	398.64	1	844.36	1	0.01	0	42.13	0	0.01	0	0.01	0	0.01	0	54.1958	15.1	4994.87	1	0.01	0	0.01	0	0.01	0	0.01	0	0.01	0	0.01	0	54.6557	15.9	92385.6	1	0.01	0	0.01	0	0.01	0	2.76	0	0.01	0	0.01	0
327005406	1	9.0486	14.2	11.09	0	0.01	0	0.01	0	42.88	0	0.01	0	1.52	0	12.81	0	9.59891	14.7	1563.65	1	0.01	0	0.01	0	20.14	0	7.1	0	27.52	0	0.01	0	10.0589	15.5	27.43	0	0.01	0	0.01	0	1.73	0	0.01	0	13.7	0	13.7	0
327005407	2	10.7789	14.7	246.76	1	110.59	1	0.01	0	0.01	0	42.72	0	0.01	0	0.01	0	11.3292	14.5	134.69	1	334.12	1	0.01	0	0.01	0	0.01	0	9.53	0	0.01	0	11.7892	14.6	672.64	1	0.01	0	0.01	0	0.01	0	0.01	0	0.01	0	0.01	0
327005603	1	27.2033	16.3	200.86	1	123.3	1	143.91	1	0.01	0	125.2	1	128.88	1	273.33	1	27.7399	15.3	1430.69	1	48.77	0	0.01	0	10.59	0	53.74	0	0.01	0	33.93	1	28.1999	15.8	2457.09	1	49.19	1	0.01	0	8.56	0	0.01	0	40.64	1	19.26	0
327005902	1	5.38262	12.9	0.01	0	0.01	0	0.01	0	0.01	0	0.01	0	0.01	0	0.01	0	5.93292	12.5	7367.37	1	0.01	0	0.01	0	0.01	0	0.01	0	0.01	0	0.01	0	6.39288	11.8	0.99	0	2.21	0	0.01	0	1.01	0	0.01	0	0.01	0	16.58	0
327005903	1	3.24709	11.4	0.01	0	0.01	0	0.01	0	0.01	0	0.01	0	0.01	0	0.01	0	3.7974	12.4	11928.2	1	0.01	0	0.01	0	0.01	0	0.01	0	67.23	1	55.19	1	4.25736	13.1	2652.81	1	7.78	0	0.02	0	0.02	0	2.66	0	1.11	0	25.06	0
328000902	2	32.7228	13.9	32.52	0	0.01	0	0.01	0	0.01	0	24.47	0	0.01	0	0.01	0	33.243	13.6	1406.87	1	0.01	0	0.01	0	2.69	0	2.69	0	11.83	0	0.31	0	33.6865	13.9	0.01	0	0.01	0	0.01	0	0.01	0	0.01	0	0.01	0	0.01	0
328003102	2	39.6852	14.8	1489.57	1	0.01	0	0.01	0	0.01	0	39.37	0	0.01	0	0.01	0	40.2026	13.8	1854.58	1	0.01	0	0.01	0	0.01	0	0.01	0	0.01	0	0.01	0	40.6489	13.6	3229.97	1	0.01	0	0.01	0	0.01	0	0.01	0	0.01	0	0.01	0
328003201	1	37.076	17.2	0.01	0	0.01	0	0.01	0	0.01	0	169.67	1	0.01	0	0.01	0	37.5934	14.9	346.41	1	0.01	0	0.01	0	0.31	0	0.01	0	0.21	0	0.21	0	38.0397	16.3	4381.74	1	0.01	0	0.01	0	0.01	0	0.01	0	0.01	0	1.96	0
328003902	2	33.2183	12.1	688.22	1	0.01	0	0.01	0	0.01	0	131.28	1	0.01	0	0.01	0	33.7358	12.6	348.28	1	0.01	0	0.01	0	0.01	0	0.01	0	0.2	0	0.01	0	34.1821	13.9	12155.9	1	0.01	0	0.01	0	0.01	0	0.01	0	0.01	0	0.01	0
329003301	2	42.8583	13.2	8067.38	1	0.01	0	0.01	0	0.01	0	26.87	0	0.01	0	0.01	0	43.3785	14.5	2425.59	1	1.08	0	4.29	0	2.27	0	4.51	0	3.28	0	0.01	0	43.822	14.7	13747.1	1	0.01	0	0.01	0	3.69	0	0.01	0	0.01	0	0.01	0
329005203	1	24.9391	16.8	6583.33	1	0.01	0	0.01	0	0.01	0	41.75	0	0.01	0	0.01	0	25.4565	18	2760.78	1	1.08	0	0.69	0	0.4	0	0.2	0	1.18	0	3.47	0	25.8973	15.6	84466.3	1	0.01	0	0.01	0	0.01	0	0.01	0	0.01	0	0.01	0
330001004	2	27.0308	15.6	1310.62	1	0.01	0	0.01	0	0.01	0	25.77	0	114.9	1	0.01	0	27.5482	16.3	628.28	1	0.21	0	5.33	0	18.72	0	0.62	0	3.97	0	0.01	0	27.9945	15.3	15192	1	0.01	0	0.01	0	0.01	0	0.01	0	0.01	0	0.01	0
330002603	1	21.5962	19	1132.82	1	0.01	0	0.01	0	0.01	0	19.88	0	293.27	1	4.15	0	22.1136		639.29	1	3.1	0	0.01	0	3.53	0	20.84	0	7.43	0	17.15	0	22.5599	17.6	14277.8	1	0.01	0	0.01	0	0.01	0	0.01	0	17.74	0	0.01	0

## Sheet: Log
Log
R52	2008-04-01
R54	2008-10-01
R56	2009-04-01
STUDYID	Study ID
SEX	SEX (1, MALE; 2, FEMALE)
R52_Age	Age of participants in April 2008
R52_HB	April 2008, Hb levels
R52_PHA	April 2008 PHA Levels
R52_PHA_Yes_No	April 2008, PHA Response
R52_AMA1P	April 2008 AMA1p Levels
R52_AMA1P_Yes_No	April 2008, AMA1p Response
R52_CSP22_p001	April 2008 CSP-22 Levels
R52_CSP22_Yes_No	April 2008, CSP-22 Response
R52_LSA-1_t3	April 2008 LSA-1 Levels
R52_LSA-1_t3_Yes_No	April 2008, LSA-1 Response
R52_MB2	April 2008 MB-2 Levels
R52_MB2_Yes_No	April 2008, MB2 Response
R52_MSP-1	April 2008 MSP-1 Levels
R52_MSP-1_Yes_No	April 2008, MSP1 Response
R52_tp6	April 2008 TRAP TP6 Levels
R52_tp6_Yes_No	April 2008, TRAP TP6 Response
R54_Age	Age of participants in October 2008
R54_HB	October 2008, Hb levels
R54_PHA	October 2008 PHA Levels
R54_PHA_Yes_No	October 2008, PHA Response
R54_AMA1P	October 2008 AMA1p Levels
R54_AMA1P_Yes_No	October 2008, AMA1p Response
R54_CSP_22	October 2008 CSP-22 Levels
R54_CSP22_Yes_No	October 2008, CSP-22 Response
R54_LSA-1_t3	October 2008 LSA-1 Levels
R54_LSA-1_t3_Yes_No	October 2008, LSA-1 Response
R54_MB2	October 2008 MB-2 Levels
R54_MB2_Yes_No	October 2008, MB2 Response
R54_MSP-1	October 2008 MSP-1 Levels
R54_MSP-1_Yes_No	October 2008, MSP1 Response
R54_tp6	October 2008 TRAP TP6 Levels
R54_tp6_Yes_No	October 2008, TRAP TP6 Response
R56_Age	Age of participants in April 2009
R56_HB	April 2009, Hb levels
R56_PHA	April 2009 PHA Levels
R56_PHA_Yes_No	April 2009, PHA Response
R56_AMA-1P	April 2009 AMA1p Levels
R56_AMA-1P_Yes_No	April 2009, AMA1p Response
R56_CSP_22	April 2009 CSP-22 Levels
R56_CSP_22_Yes_No	April 2009, CSP-22 Response
R56_LSA-1_t3	April 2009 LSA-1 Levels
R56_LSA-1_t3_Yes_No	April 2009, LSA-1 Response
R56_MB2	April 2009 MB-2 Levels
R56_MB2_Yes_No	April 2009, MB2 Response
R56_MSP-1	April 2009 MSP-1 Levels
R56_MSP-1_Yes_No	April 2009, MSP1 Response
R56_tp6	April 2009, TRAP TP6 Levels
R56_tp6_Yes_No	April 2009, TRAP TP6 Response
