# Supplementary material for: Interferon-γ responses to Plasmodium falciparum vaccine candidate antigens decrease in the absence of malaria transmission
Source: PeerJ. 2017 Jan 10;5:e2855. doi: 10.7717/peerj.2855 (PMC5228499; doi:10.7717/peerj.2855)
Supplement: Supplemental Information 2 [file peerj-05-2855-s005.xlsx]

## Sheet: October 2008_IFNg
Sample ID	Study ID	Round	Sex	Pf Microscopy Results	Age	Date of Collection
20100140254041	201001402	54	2	0	31.2964	2012-10-29
20100170154041	201001701	54	2	0	50.1875	2012-10-29
20100350254041	201003502	54	2	0	40.8241	2012-10-29
20100350754041	201003507	54	1	0	7.40862	2012-10-29
20100530154041	201005301	54	1	0	62.82	2012-10-29
20100530254041	201005302	54	2	0	50.3984	2012-10-29
20100530754041	201005307	54	1	0	10.2204	2012-10-29
20100610254041	201006102	54	2	0	37.974	2012-10-29
20100610954041	201006109	54	2	0	4.01643	2012-10-29
20100750354041	201007503	54	1	0	21.3415	2012-11-12
20100810254041	201008102	54	2	0	40.2327	2012-10-29
20100810454041	201008104	54	2	0	19.4251	2012-11-12
20100940254041	201009402	54	2	0	29.4264	2012-11-13
20100990354041	201009903	54	2	0	30.8884	2012-10-29
20201420154041	202014201	54	1	0	41.4073	2012-10-29
20220020154041	202200201	54	1	0	38.8966	2012-10-29
20220100654041	202201006	54	1	0	3.70705	2012-10-29
20302000554041	203020005	54	2	0	10.6064	2012-10-30
20302040454041	203020404	54	1	0	18.3956	2012-10-30
20302040554041	203020405	54	1	0	15.5784	2012-10-30
20302040654041	203020406	54	1	0	12.6105	2012-10-30
20302040754041	203020407	54	2	0	10.1711	2012-10-30
20302110154041	203021101	54	1	0	56.4928	2012-10-29
20302320354041	203023203	54	1	0	16.2437	2012-10-30
20302320554041	203023205	54	2	0	11.1704	2012-10-30
20302320654041	203023206	54	2	0	8.73648	2012-10-30
20302520154041	203025201	54	1	0	50.9925	2012-10-30
20302520754041	203025207	54	2	0	20.2245	2012-11-13
20302520854041	203025208	54	1	0	16.3012	2012-10-30
20302520954041	203025209	54	2	0	15.3073	2012-10-30
20302521154041	203025211	54	1	0	5.54415	2012-11-05
20330100454041	203301004	54	2	0	29.848	2012-10-30
20330100554041	203301005	54	2	0	10.1328	2012-10-30
20330100754041	203301007	54	2	0	5.04038	2012-10-30
20330140154041	203301401	54	2	0	5.54141	2012-10-30
20402650554041	204026505	54	1	0	28.8296	2012-10-31
20402651054041	204026510	54	1	0	9.17454	2012-10-31
20402651154041	204026511	54	1	0	6.9295	2012-10-31
20402670154041	204026701	54	1	0	68.8296	2012-10-31
20402670254041	204026702	54	2	0	54.8282	2012-10-31
20402670554041	204026705	54	1	0	12.3587	2012-10-31
20402750154041	204027501	54	2	0	44.6872	2012-10-31
20402750654041	204027506	54	1	0	6.83368	2012-10-31
20402920454041	204029204	54	2	0	17.128	2012-10-31
20402920654041	204029206	54	2	0	14.2806	2012-10-29
20402920754041	204029207	54	1	0	9.9384	2012-10-29
20402920854041	204029208	54	2	0	6.60643	2012-10-31
20402920954041	204029209	54	1	0	6.17933	2012-10-31
20402921054041	204029210	54	2	0	3.95619	2012-10-31
20402930454041	204029304	54	1	0	27.9288	2012-10-31
20440130154041	204401301	54	1	0	31.2854	2012-10-31
20440130454041	204401304	54	1	0	3.58932	2012-10-31
20440250154041	204402501	54	1	0	4.62697	2012-11-05
20503390154041	205033901	54	1	0	49.8426	2012-11-05
20503680254041	205036802	54	1	0	12.742	2012-10-30
20503720654041	205037206	54	1	0	44.3012	2012-11-05
20503790154041	205037901	54	1	0	58.0315	2012-11-13
20503790254041	205037902	54	2	0	43.8412	2012-11-05
20503790554041	205037905	54	1	0	15.1321	2012-10-30
20503790754041	205037907	54	2	0	8.16975	2012-10-30
20503800154041	205038001	54	1	0	52.8433	2012-11-05
20503800254041	205038002	54	2	0	46.8419	2012-11-05
20503800754041	205038007	54	2	0	17.8261	2012-10-30
20503800854041	205038008	54	2	0	13.4127	2012-10-30
20503800954041	205038009	54	2	0	12.0767	2012-10-30
20503801054041	205038010	54	2	0	10.1602	2012-10-30
20503801254041	205038012	54	1	0	6.66119	2012-10-30
20503801354041	205038013	54	1	0	6.66119	2012-10-30
20503950654041	205039506	54	2	0	23.447	2012-11-05
20503960854041	205039608	54	2	0	8.69815	2012-11-05
20503960954041	205039609	54	1	0	7.04175	2012-11-05
20503961054041	205039610	54	2	0	4.64066	2012-11-05
20550030254041	205500302	54	2	0	30.8419	2012-11-05
20550030454041	205500304	54	1	0	4.47912	2012-11-05
20604060954041	206040609	54	2	0	11.8193	2012-11-05
20604061254041	206040612	54	2	0	7.60027	2012-11-05
20604061654041	206040616	54	2	0	5.08966	2012-11-05
20604061854041	206040618	54	2	0	2.92676	2012-11-05
20604180654041	206041806	54	2	0	11.5127	2012-11-05
20604330154041	206043301	54	1	0	56.8652	2012-11-13
20604330254041	206043302	54	2	0	46.8419	2012-11-05
20604330454041	206043304	54	1	0	9.18549	2012-11-05
20604330554041	206043305	54	1	0	7.14305	2012-11-05
20604560254041	206045602	54	2	0	42.8419	2012-11-05
20604560654041	206045606	54	2	0	17.7577	2012-11-05
20660060254041	206600602	54	2	0	29.1745	2012-11-05
20660150154041	206601501	54	1	0	31.0308	2012-11-13
20660150254041	206601502	54	2	0	27.1677	2012-11-05
20660340154041	206603401	54	1	0	4.6653	2012-11-05
20660470154041	206604701	54	1	0	62.8419	2012-11-05
20660520354041	206605203	54	1	0	17.1335	2012-11-13
20660520454041	206605204	54	2	0	14.8227	2012-11-13
20660620254041	206606202	54	1	0	5.24298	2012-11-13
20704770254041	207047702	54	2	0	49.8617	2012-11-12
20704771154041	207047711	54	2	0	27.384	2012-11-12
20704771254041	207047712	54	2	0	9.3525	2012-10-31
20704890454041	207048904	54	1	0	36.7584	2012-11-12
20704930154041	207049301	54	1	0	46.8638	2012-11-13
20704930254041	207049302	54	2	0	34.8611	2012-11-12
20704950154041	207049501	54	2	0	66.8611	2012-11-12
20704950954041	207049509	54	2	0	21.2485	2012-11-13
20705170154041	207051701	54	1	0	74.8611	2012-11-12
20705170554041	207051705	54	2	0	24.8268	2012-11-12
20705170754041	207051707	54	2	0	22.8611	2012-11-12
20705170854041	207051708	54	1	0	8.69268	2012-10-31
20705190554041	207051905	54	2	0	28.8624	2012-11-12
20705190654041	207051906	54	2	0	9.99589	2012-10-31
20705190754041	207051907	54	2	0	6.7488	2012-10-31
20705200554041	207052005	54	1	0	15.2115	2012-10-31
20705200754041	207052007	54	2	0	8.00821	2012-10-31
20705230154041	207052301	54	1	0	36.8624	2012-11-12
20705270354041	207052703	54	2	0	18.7023	2012-11-13
20705270454041	207052704	54	1	0	14.7433	2012-10-31
20705270554041	207052705	54	2	0	12.7447	2012-10-31
20705270754041	207052707	54	1	0	7.93977	2012-10-31
20705410254041	207054102	54	1	0	33.4292	2012-11-13
20770030154041	207700301	54	2	0	37.3525	2012-11-13
20770060154041	207700601	54	2	0	58.8611	2012-11-12
20770060454041	207700604	54	2	0	18.3491	2012-10-31
20770120154041	207701201	54	2	0	3.88227	2012-10-31
32100040254041	321000402	54	2	0	39.8412	2012-11-05
32100180454041	321001804	54	1	0	31.4387	2012-11-05
32100181154041	321001811	54	2	0	26.8638	2012-11-05
32100280454041	321002804	54	1	0	29.8782	2012-11-05
32200090154041	322000901	54	1	0	44.397	2012-11-05
32200090254041	322000902	54	2	0	34.9049	2012-11-12
32200220354041	322002203	54	1	0	35.6057	2012-11-05
32200230754041	322002307	54	1	0	38.8638	2012-11-05
32200290354041	322002903	54	1	0	36.1889	2012-10-31
32200310254041	322003102	54	2	0	58.8611	2012-11-12
32200480154041	322004801	54	2	0	45.8973	2012-11-05
32200560354041	322005603	54	2	0	30.0616	2012-11-12
32200730154041	322007301	54	1	0	37.8973	2012-11-05
32200750354041	322007503	54	1	0	34.36	2012-11-05
32200820154041	322008201	54	1	0	34.2204	2012-11-05
32201010154041	322010101	54	2	0	28.5749	2012-11-05
32300370354041	323003703	54	1	0	20.0876	2012-11-13
32300400154041	323004001	54	1	0	76.8433	2012-11-05
32400070354041	324000703	54	1	0	31.9014	2012-10-30
32400120154041	324001201	54	2	0	34.9076	2012-10-29
32400160354041	324001603	54	1	0	31.8029	2012-10-29
32400420154041	324004201	54	1	0	34.5435	2012-10-30
32400420254041	324004202	54	2	0	29.7029	2012-10-29
32400420354041	324004203	54	1	0	9.64545	2012-10-29
32400420454041	324004204	54	1	0	6.83641	2012-10-29
32400420554041	324004205	54	1	0	4.14784	2012-10-29
32400430754041	324004307	54	1	0	45.7358	2012-10-29
32400460154041	324004601	54	1	0	74.9733	2012-10-29
32400460254041	324004602	54	2	0	60.8241	2012-10-29
32400460454041	324004604	54	1	0	28.7392	2012-10-30
32400460554041	324004605	54	2	0	25.1116	2012-10-30
32400460754041	324004607	54	1	0	18.7159	2012-10-30
32400461054041	324004610	54	2	0	23.3155	2012-10-29
32400540254041	324005402	54	2	0	43.4935	2012-10-30
32400540654041	324005406	54	1	0	9.7358	2012-10-29
32400590154041	324005901	54	1	0	31.9863	2012-10-29
32400590254041	324005902	54	2	0	28.7365	2012-10-29
32400590354041	324005903	54	2	0	8.21629	2012-10-29
32400590454041	324005904	54	2	0	6.52977	2012-10-29
32400590654041	324005906	54	1	0	3.90691	2012-10-29
32400650154041	324006501	54	1	0	34.5133	2012-10-29
32400650354041	324006503	54	2	0	8.82136	2012-10-29
32400650554041	324006505	54	1	0	5.39357	2012-10-30
32400800154041	324008001	54	1	0	40.3997	2012-10-30
32400800254041	324008002	54	2	0	34.4723	2012-10-30
32400800454041	324008004	54	1	0	8.64066	2012-10-29
32400800554041	324008005	54	1	0	5.54415	2012-10-29
32400890154041	324008901	54	1	0	66.3299	2012-11-13
32400890254041	324008902	54	2	0	55.2252	2012-10-30
32400930154041	324009301	54	1	0	51.8877	2012-10-30
32400930254041	324009302	54	2	0	36.2053	2012-10-30
32400930554041	324009305	54	1	0	14.4997	2012-10-29
32400930754041	324009307	54	1	0	10.1766	2012-10-29
32401070154041	324010701	54	2	0	33.2676	2012-10-30
32401070354041	324010703	54	1	0	5.3306	2012-10-29
32401170254041	324011702	54	1	0	4	2012-10-29
32500020154041	325000201	54	1	0	36.9336	2012-11-13
32500170254041	325001702	54	2	0	47.4031	2012-10-31
32500170454041	325001704	54	2	0	21.2101	2012-10-30
32500170554041	325001705	54	2	0	19.5455	2012-10-31
32500170654041	325001706	54	2	0	17.2402	2012-10-31
32500170854041	325001708	54	2	0	12.2136	2012-10-30
32500170954041	325001709	54	2	0	9.54689	2012-10-30
32500350154041	325003501	54	1	0	55.9644	2012-11-13
32500350254041	325003502	54	2	0	46.5763	2012-10-31
32500350854041	325003508	54	2	0	14.245	2012-10-30
32500440154041	325004401	54	1	0	43.4141	2012-10-31
32500440354041	325004403	54	2	0	17.4976	2012-10-31
32500440454041	325004404	54	2	0	15.258	2012-10-30
32500440554041	325004405	54	1	0	12.8624	2012-10-30
32500440654041	325004406	54	1	0	9.21561	2012-10-30
32500460154041	325004601	54	2	0	82.5133	2012-10-31
32500480154041	325004801	54	1	0	43.488	2012-10-30
32500480254041	325004802	54	2	0	40.2163	2012-10-31
32500480354041	325004803	54	1	0	21.0075	2012-10-31
32500480554041	325004805	54	1	0	15.5346	2012-10-30
32500480654041	325004806	54	1	0	8.70637	2012-10-30
32600150554041	326001505	54	2	0	13.1061	2012-10-31
32600260254041	326002602	54	2	0	49.0623	2012-11-05
32600260354041	326002603	54	1	0	26.2067	2012-11-13
32600300354041	326003003	54	1	0	31.3374	2012-11-05
32600420154041	326004201	54	2	0	73.8645	2012-11-13
32600420354041	326004203	54	2	0	24.564	2012-10-31
32600430854041	326004308	54	2	0	7.13484	2012-11-05
32600430954041	326004309	54	2	0	4.46543	2012-11-05
32600450154041	326004501	54	1	0	58.3491	2012-11-05
32600450254041	326004502	54	2	0	46.7269	2012-11-05
32600450454041	326004504	54	2	0	18.8556	2012-11-05
32600450554041	326004505	54	2	0	16.5421	2012-11-05
32600450654041	326004506	54	1	0	14.2396	2012-10-31
32600510154041	326005101	54	1	0	59.447	2012-11-05
32600510254041	326005102	54	2	0	51.3347	2012-11-05
32600510354041	326005103	54	2	0	30.5818	2012-11-05
32600510854041	326005108	54	1	0	14.7734	2012-10-30
32600640454041	326006404	54	1	0	15.3155	2012-10-31
32600760154041	326007601	54	2	0	28.0164	2012-11-05
32600760254041	326007602	54	1	0	3.89322	2012-11-05
32700040254041	327000402	54	2	0	68.8296	2012-10-31
32700060354041	327000603	54	1	0	8.85421	2012-10-31
32700060454041	327000604	54	1	0	8.85421	2012-10-31
32700060554041	327000605	54	1	0	6.97604	2012-10-31
32700070754041	327000707	54	2	0	14.4339	2012-10-30
32700080154041	327000801	54	2	0	53.2183	2012-10-31
32700080454041	327000804	54	2	0	16.167	2012-10-30
32700080554041	327000805	54	2	0	11.4196	2012-10-30
32700170254041	327001702	54	2	0	25.1964	2012-11-05
32700490154041	327004901	54	1	0	41.0322	2012-11-05
32700490254041	327004902	54	2	0	38.8884	2012-11-05
32700540154041	327005401	54	1	0	62.9295	2012-11-05
32700540254041	327005402	54	2	0	54.1958	2012-11-05
32700540654041	327005406	54	1	0	9.5989	2012-11-05
32700540754041	327005407	54	2	0	11.3292	2012-11-05
32700560354041	327005603	54	1	0	27.7399	2012-10-31
32700590254041	327005902	54	1	0	5.93292	2012-11-05
32700590354041	327005903	54	1	0	3.7974	2012-11-05
32800090254041	328000902	54	2	0	33.243	2012-11-13
32800310254041	328003102	54	2	0	40.2026	2012-11-12
32800320154041	328003201	54	1	0	37.5934	2012-11-12
32800390254041	328003902	54	2	0	33.7358	2012-11-12
32900330154041	329003301	54	2	0	43.3785	2012-11-13
32900520354041	329005203	54	1	0	25.4565	2012-11-12
33000100454041	330001004	54	2	0	27.5483	2012-11-12
33000260354041	330002603	54	1	0	22.1136	2012-11-12

## Sheet: April 2009_IFNg
Sample ID	Study ID	Round	Sex	Pf Microscopy Results	Age	Date of Collection
20100140256041	201001402	56	2	0	31.7755	2013-04-22
20100170156041	201001701	56	2	0	50.6667	2013-04-22
20100350256041	201003502	56	2	0	41.3032	2013-04-22
20100350756041	201003507	56	1	0	7.88775	2013-04-22
20100530156041	201005301	56	1	0	63.2991	2013-04-22
20100530256041	201005302	56	2	0	50.8775	2013-04-22
20100530756041	201005307	56	1	0	10.6995	2013-04-22
20100610256041	201006102	56	2	0	38.4531	2013-04-22
20100610956041	201006109	56	2	0	4.49555	2013-04-22
20100750356041	201007503	56	1	0	21.7823	2013-04-22
20100810256041	201008102	56	2	0	40.7118	2013-04-22
20100810456041	201008104	56	2	0	19.8658	2013-04-22
20100940256041	201009402	56	2	0	29.8645	2013-04-22
20100990356041	201009903	56	2	0	31.3511	2013-04-16
20201420156041	202014201	56	1	0	41.87	2013-04-16
20220020156041	202200201	56	1	0	39.3593	2013-04-16
20220100656041	202201006	56	1	0	4.16975	2013-04-16
20302000556041	203020005	56	2	0	11.0856	2013-04-23
20302040456041	203020404	56	1	0	18.8528	2013-04-15
20302040556041	203020405	56	1	0	16.0548	2013-04-22
20302040656041	203020406	56	1	0	13.0897	2013-04-23
20302040756041	203020407	56	2	0	10.6502	2013-04-23
20302110156041	203021101	56	1	0	56.9719	2013-04-22
20302320356041	203023203	56	1	0	16.7009	2013-04-15
20302320556041	203023205	56	2	0	11.6277	2013-04-15
20302320656041	203023206	56	2	0	9.1937	2013-04-15
20302520156041	203025201	56	1	0	51.4716	2013-04-23
20302520756041	203025207	56	2	0	20.6653	2013-04-23
20302520856041	203025208	56	1	0	16.7803	2013-04-23
20302520956041	203025209	56	2	0	15.7864	2013-04-23
20302521156041	203025211	56	1	0	6.00684	2013-04-23
20330100456041	203301004	56	2	0	30.3053	2013-04-15
20330100556041	203301005	56	2	0	10.59	2013-04-15
20330100756041	203301007	56	2	0	5.4976	2013-04-15
20330140156041	203301401	56	2	0	5.99863	2013-04-15
20402650556041	204026505	56	1	0	29.306	2013-04-23
20402651056041	204026510	56	1	0	9.65092	2013-04-23
20402651156041	204026511	56	1	0	7.40589	2013-04-23
20402670156041	204026701	56	1	0	69.306	2013-04-23
20402670256041	204026702	56	2	0	55.3046	2013-04-23
20402670556041	204026705	56	1	0	12.835	2013-04-23
20402750156041	204027501	56	2	0	45.1417	2013-04-15
20402750656041	204027506	56	1	0	7.28816	2013-04-15
20402920456041	204029204	56	2	0	17.6044	2013-04-23
20402920656041	204029206	56	2	0	14.7406	2013-04-15
20402920756041	204029207	56	1	0	10.3984	2013-04-15
20402920856041	204029208	56	2	0	7.08282	2013-04-23
20402920956041	204029209	56	1	0	6.63381	2013-04-15
20402921056041	204029210	56	2	0	4.41068	2013-04-15
20402930456041	204029304	56	1	0	28.4052	2013-04-23
20440130156041	204401301	56	1	0	31.7399	2013-04-15
20440130456041	204401304	56	1	0	4.04381	2013-04-15
20440250156041	204402501	56	1	0	5.06776	2013-04-15
20503390156041	205033901	56	1	0	50.3025	2013-04-22
20503680256041	205036802	56	1	0	13.2211	2013-04-23
20503720656041	205037206	56	1	0	44.7611	2013-04-22
20503790156041	205037901	56	1	0	58.4559	2013-04-17
20503790256041	205037902	56	2	0	44.2875	2013-04-17
20503790556041	205037905	56	1	0	15.5948	2013-04-17
20503790756041	205037907	56	2	0	8.63244	2013-04-17
20503800156041	205038001	56	1	0	53.2895	2013-04-17
20503800256041	205038002	56	2	0	47.2882	2013-04-17
20503800756041	205038007	56	2	0	18.2888	2013-04-17
20503800856041	205038008	56	2	0	13.8754	2013-04-17
20503800956041	205038009	56	2	0	12.5394	2013-04-17
20503801056041	205038010	56	2	0	10.6229	2013-04-17
20503801256041	205038012	56	1	0	7.12389	2013-04-17
20503801356041	205038013	56	1	0	7.12389	2013-04-17
20503950656041	205039506	56	2	0	23.9097	2013-04-23
20503960856041	205039608	56	2	0	9.14442	2013-04-17
20503960956041	205039609	56	1	0	7.48802	2013-04-17
20503961056041	205039610	56	2	0	5.08693	2013-04-17
20550030256041	205500302	56	2	0	31.3073	2013-04-24
20550030456041	205500304	56	1	0	4.94456	2013-04-24
20604060956041	206040609	56	2	0	12.2656	2013-04-17
20604061256041	206040612	56	2	0	8.04654	2013-04-17
20604061656041	206040616	56	2	0	5.53593	2013-04-17
20604061856041	206040618	56	2	0	3.37303	2013-04-17
20604180656041	206041806	56	2	0	11.9589	2013-04-17
20604330156041	206043301	56	1	0	57.2895	2013-04-17
20604330256041	206043302	56	2	0	47.2882	2013-04-17
20604330456041	206043304	56	1	0	9.64819	2013-04-23
20604330556041	206043305	56	1	0	7.58932	2013-04-17
20604560256041	206045602	56	2	0	43.3073	2013-04-24
20604560656041	206045606	56	2	0	18.2204	2013-04-23
20660060256041	206600602	56	2	0	29.6208	2013-04-17
20660150156041	206601501	56	1	0	31.4552	2013-04-17
20660150256041	206601502	56	2	0	27.614	2013-04-17
20660340156041	206603401	56	1	0	5.11157	2013-04-17
20660470156041	206604701	56	1	0	63.2882	2013-04-17
20660520356041	206605203	56	1	0	17.5743	2013-04-23
20660520456041	206605204	56	2	0	15.2635	2013-04-23
20660620256041	206606202	56	1	0	5.68378	2013-04-23
20704770256041	207047702	56	2	0	50.2861	2013-04-16
20704771156041	207047711	56	2	0	27.8084	2013-04-16
20704771256041	207047712	56	2	0	9.80972	2013-04-16
20704890456041	207048904	56	1	0	37.2019	2013-04-23
20704930156041	207049301	56	1	0	47.3073	2013-04-24
20704930256041	207049302	56	2	0	35.3073	2013-04-24
20704950156041	207049501	56	2	0	67.3073	2013-04-24
20704950956041	207049509	56	2	0	21.6701	2013-04-16
20705170156041	207051701	56	1	0	75.3073	2013-04-24
20705170556041	207051705	56	2	0	25.2512	2013-04-16
20705170756041	207051707	56	2	0	23.2854	2013-04-16
20705170856041	207051708	56	1	0	9.1718	2013-04-24
20705190556041	207051905	56	2	0	29.2868	2013-04-16
20705190656041	207051906	56	2	0	10.4531	2013-04-16
20705190756041	207051907	56	2	0	7.20602	2013-04-16
20705200556041	207052005	56	1	0	15.6906	2013-04-24
20705200756041	207052007	56	2	0	8.46543	2013-04-16
20705230156041	207052301	56	1	0	37.2868	2013-04-16
20705270356041	207052703	56	2	0	19.1403	2013-04-22
20705270456041	207052704	56	1	0	15.2225	2013-04-24
20705270556041	207052705	56	2	0	13.2019	2013-04-16
20705270756041	207052707	56	1	0	8.41889	2013-04-24
20705410256041	207054102	56	1	0	33.8508	2013-04-16
20770030156041	207700301	56	2	0	37.7741	2013-04-16
20770060156041	207700601	56	2	0	59.2854	2013-04-16
20770060456041	207700604	56	2	0	18.8282	2013-04-24
20770120156041	207701201	56	2	0	4.33949	2013-04-16
32100040256041	321000402	56	2	0	40.3039	2013-04-23
32100180456041	321001804	56	1	0	31.9014	2013-04-23
32100181156041	321001811	56	2	0	27.3265	2013-04-23
32100280456041	321002804	56	1	0	30.3409	2013-04-23
32200090156041	322000901	56	1	0	44.8569	2013-04-22
32200090256041	322000902	56	2	0	35.3457	2013-04-22
32200220356041	322002203	56	1	0	36.0684	2013-04-23
32200230756041	322002307	56	1	0	39.3265	2013-04-23
32200290356041	322002903	56	1	0	36.6626	2013-04-22
32200310256041	322003102	56	2	0	59.3046	2013-04-23
32200480156041	322004801	56	2	0	46.36	2013-04-23
32200560356041	322005603	56	2	0	30.5051	2013-04-23
32200730156041	322007301	56	1	0	38.36	2013-04-23
32200750356041	322007503	56	1	0	34.8227	2013-04-23
32200820156041	322008201	56	1	0	34.6639	2013-04-16
32201010156041	322010101	56	2	0	29.0376	2013-04-23
32300370356041	323003703	56	1	0	20.5284	2013-04-23
32300400156041	323004001	56	1	0	77.3032	2013-04-22
32400070356041	324000703	56	1	0	32.3587	2013-04-15
32400120156041	324001201	56	2	0	35.3676	2013-04-15
32400160356041	324001603	56	1	0	32.2628	2013-04-15
32400420156041	324004201	56	1	0	35.0007	2013-04-15
32400420256041	324004202	56	2	0	30.1629	2013-04-15
32400420356041	324004203	56	1	0	10.1054	2013-04-15
32400420456041	324004204	56	1	0	7.29637	2013-04-15
32400420556041	324004205	56	1	0	4.6078	2013-04-15
32400430756041	324004307	56	1	0	46.2204	2013-04-24
32400460156041	324004601	56	1	0	75.4333	2013-04-15
32400460256041	324004602	56	2	0	61.2841	2013-04-15
32400460456041	324004604	56	1	0	29.2019	2013-04-17
32400460556041	324004605	56	2	0	25.5688	2013-04-15
32400460756041	324004607	56	1	0	19.1732	2013-04-15
32400461056041	324004610	56	2	0	23.7755	2013-04-15
32400540256041	324005402	56	2	0	43.9507	2013-04-15
32400540656041	324005406	56	1	0	10.1958	2013-04-15
32400590156041	324005901	56	1	0	32.4709	2013-04-24
32400590256041	324005902	56	2	0	29.1964	2013-04-15
32400590356041	324005903	56	2	0	8.67625	2013-04-15
32400590456041	324005904	56	2	0	6.98973	2013-04-15
32400590656041	324005906	56	1	0	4.36687	2013-04-15
32400650156041	324006501	56	1	0	34.9733	2013-04-15
32400650356041	324006503	56	2	0	9.28131	2013-04-15
32400650556041	324006505	56	1	0	5.85079	2013-04-15
32400800156041	324008001	56	1	0	40.8597	2013-04-16
32400800256041	324008002	56	2	0	34.9322	2013-04-16
32400800456041	324008004	56	1	0	9.10335	2013-04-16
32400800556041	324008005	56	1	0	6.00684	2013-04-16
32400890156041	324008901	56	1	0	66.7515	2013-04-16
32400890256041	324008902	56	2	0	55.6851	2013-04-16
32400930156041	324009301	56	1	0	52.3477	2013-04-16
32400930256041	324009302	56	2	0	36.6872	2013-04-24
32400930556041	324009305	56	1	0	14.9596	2013-04-15
32400930756041	324009307	56	1	0	10.6393	2013-04-16
32401070156041	324010701	56	2	0	33.7248	2013-04-15
32401070356041	324010703	56	1	0	5.79055	2013-04-15
32401170256041	324011702	56	1	0	4.4627	2013-04-16
32500020156041	325000201	56	1	0	37.3552	2013-04-16
32500170256041	325001702	56	2	0	47.8631	2013-04-17
32500170456041	325001704	56	2	0	21.692	2013-04-24
32500170556041	325001705	56	2	0	20.0055	2013-04-17
32500170656041	325001706	56	2	0	17.7194	2013-04-24
32500170856041	325001708	56	2	0	12.6735	2013-04-16
32500170956041	325001709	56	2	0	10.0096	2013-04-17
32500350156041	325003501	56	1	0	56.386	2013-04-16
32500350256041	325003502	56	2	0	47.0363	2013-04-17
32500350856041	325003508	56	2	0	14.705	2013-04-16
32500440156041	325004401	56	1	0	43.8713	2013-04-16
32500440356041	325004403	56	2	0	17.9548	2013-04-16
32500440456041	325004404	56	2	0	15.718	2013-04-16
32500440556041	325004405	56	1	0	13.3251	2013-04-17
32500440656041	325004406	56	1	0	9.67556	2013-04-16
32500460156041	325004601	56	2	0	82.9733	2013-04-17
32500480156041	325004801	56	1	0	43.948	2013-04-16
32500480256041	325004802	56	2	0	40.6762	2013-04-17
32500480356041	325004803	56	1	0	21.4675	2013-04-17
32500480556041	325004805	56	1	0	15.9945	2013-04-16
32500480656041	325004806	56	1	0	9.16632	2013-04-16
32600150556041	326001505	56	2	0	13.5661	2013-04-17
32600260256041	326002602	56	2	0	49.5222	2013-04-22
32600260356041	326002603	56	1	0	26.6448	2013-04-22
32600300356041	326003003	56	1	0	31.7974	2013-04-22
32600420156041	326004201	56	2	0	74.3025	2013-04-22
32600420356041	326004203	56	2	0	25.0376	2013-04-22
32600430856041	326004308	56	2	0	7.5948	2013-04-22
32600430956041	326004309	56	2	0	4.92539	2013-04-22
32600450156041	326004501	56	1	0	58.809	2013-04-22
32600450256041	326004502	56	2	0	47.1869	2013-04-22
32600450456041	326004504	56	2	0	19.3155	2013-04-22
32600450556041	326004505	56	2	0	17.0021	2013-04-22
32600450656041	326004506	56	1	0	14.7132	2013-04-22
32600510156041	326005101	56	1	0	59.9069	2013-04-22
32600510256041	326005102	56	2	0	51.7947	2013-04-22
32600510356041	326005103	56	2	0	31.0281	2013-04-17
32600510856041	326005108	56	1	0	15.2334	2013-04-16
32600640456041	326006404	56	1	0	15.7919	2013-04-23
32600760156041	326007601	56	2	0	28.4764	2013-04-22
32600760256041	326007602	56	1	0	4.35318	2013-04-22
32700040256041	327000402	56	2	0	69.2895	2013-04-17
32700060356041	327000603	56	1	0	9.31417	2013-04-17
32700060456041	327000604	56	1	0	9.31417	2013-04-17
32700060556041	327000605	56	1	0	7.436	2013-04-17
32700070756041	327000707	56	2	0	14.8939	2013-04-16
32700080156041	327000801	56	2	0	53.6783	2013-04-17
32700080456041	327000804	56	2	0	16.627	2013-04-16
32700080556041	327000805	56	2	0	11.8823	2013-04-17
32700170256041	327001702	56	2		25.6564	2013-04-22
32700490156041	327004901	56	1	0	41.4921	2013-04-22
32700490256041	327004902	56	2	0	39.3347	2013-04-17
32700540156041	327005401	56	1	0	63.3895	2013-04-22
32700540256041	327005402	56	2	0	54.6557	2013-04-22
32700540656041	327005406	56	1	0	10.0589	2013-04-22
32700540756041	327005407	56	2	0	11.7892	2013-04-22
32700560356041	327005603	56	1	0	28.1999	2013-04-17
32700590256041	327005902	56	1	0	6.39288	2013-04-22
32700590356041	327005903	56	1	0	4.25736	2013-04-22
32800090256041	328000902	56	2	0	33.6865	2013-04-24
32800310256041	328003102	56	2	0	40.6489	2013-04-24
32800320156041	328003201	56	1	0	38.0397	2013-04-24
32800390256041	328003902	56	2	0	34.1821	2013-04-24
32900330156041	329003301	56	2	0	43.822	2013-04-24
32900520356041	329005203	56	1	0	25.8973	2013-04-22
33000100456041	330001004	56	2	0	27.9945	2013-04-24
33000260356041	330002603	56	1	0	22.5599	2013-04-24

## Sheet: October 2008_multiple cytokine
Sample ID	Study ID	Round	Sex	Pf Microscopy Results	Age	Date of Collection
32401070354041	324010703	54	1	0	5.3306	2012-10-29
32400930554041	324009305	54	1	0	14.4997	2012-10-29
32400420554041	324004205	54	1	0	4.14784	2012-10-29
20100350254041	201003502	54	2	0	40.8241	2012-10-29
20402920754041	204029207	54	1	0	9.9384	2012-10-29
20302260854041	203022608	54	2	0	7.40862	2012-10-29
20302260154041	203022601	54	2	0	69.8234	2012-10-29
20302110154041	203021101	54	1	0	56.4928	2012-10-29
20201420154041	202014201	54	1	0	41.4073	2012-10-29
20100990354041	201009903	54	2	0	30.8884	2012-10-29
32500170854041	325001708	54	2	0	12.2136	2012-10-30
32500170454041	325001704	54	2	0	21.2101	2012-10-30
32401070154041	324010701	54	2	0	33.2676	2012-10-30
20302520154041	203025201	54	1	0	50.9925	2012-10-30
32400930154041	324009301	54	1	0	51.8877	2012-10-30
32400800254041	324008002	54	2	0	34.4723	2012-10-30
32400590454041	324005904	54	2	0	6.52977	2012-10-29
32400460554041	324004605	54	2	0	25.1116	2012-10-30
32400420254041	324004202	54	2	0	29.7029	2012-10-29
32400420154041	324004201	54	1	0	34.5435	2012-10-30
32700080454041	327000804	54	2	0	16.167	2012-10-30
32600510854041	326005108	54	1	0	14.7734	2012-10-30
32500480654041	325004806	54	1	0	8.70637	2012-10-30
20503800854041	205038008	54	2	0	13.4127	2012-10-30
20330100554041	203301005	54	2	0	10.1328	2012-10-30
20302320654041	203023206	54	2	0	8.73648	2012-10-30
20302041054041	203020410	54	1	0	7.4141	2012-10-30
20302040654041	203020406	54	1	0	12.6105	2012-10-30
20302000954041	203020009	54	1	0	4.0794	2012-10-30
20302000754041	203020007	54	1	0	8.9117	2012-10-30
32400420354041	324004203	54	1	0	9.64545	2012-10-29
32400540654041	324005406	54	1	0	9.7358	2012-10-29
32400120154041	324001201	54	2	0	34.9076	2012-10-29
20705190554041	207051905	54	2	0	28.8624	2012-11-12
32400160354041	324001603	54	1	0	31.8029	2012-10-29
32400460254041	324004602	54	2	0	60.8241	2012-10-29
32400461054041	324004610	54	2	0	23.3155	2012-10-29
32400650154041	324006501	54	1	0	34.5133	2012-10-29
20302040454041	203020404	54	1	0	18.3956	2012-10-30
20704770254041	207047702	54	2	0	49.8617	2012-11-12
20770120154041	207701201	54	2	0	3.88227	2012-10-31
20503800954041	205038009	54	2	0	12.0767	2012-10-30
20503790754041	205037907	54	2	0	8.16975	2012-10-30
20100940254041	201009402	54	2	0	29.4264	2012-11-13
20503801354041	205038013	54	1	0	6.66119	2012-10-30
20503801054041	205038010	54	2	0	10.1602	2012-10-30
20503790254041	205037902	54	2	0	43.8412	2012-11-05
32600510354041	326005103	54	2	0	30.5818	2012-11-05
32400460454041	324004604	54	1	0	28.7392	2012-10-30
20100350754041	201003507	54	1	0	7.40862	2012-10-29
32600300354041	326003003	54	1	0	31.3374	2012-11-05
32600450254041	326004502	54	2	0	46.7269	2012-11-05
32700540154041	327005401	54	1	0	62.9295	2012-11-05
32400930254041	324009302	54	2	0	36.2053	2012-10-30
32200360554041	322003605	54	2	0	7.2553	2012-11-12
32600760154041	326007601	54	2	0	28.0164	2012-11-05
20402930454041	204029304	54	1	0	27.9288	2012-10-31
20705200554041	207052005	54	1	0	15.2115	2012-10-31
32400590154041	324005901	54	1	0	31.9863	2012-10-29
20704930254041	207049302	54	2	0	34.8611	2012-11-12
32700590354041	327005903	54	1	0	3.7974	2012-11-05
32700540754041	327005407	54	2	0	11.3292	2012-11-05
32700540654041	327005406	54	1	0	9.5989	2012-11-05
32500350254041	325003502	54	2	0	46.5763	2012-10-31
32700060554041	327000605	54	1	0	6.97604	2012-10-31
32600450454041	326004504	54	2	0	18.8556	2012-11-05
32600450154041	326004501	54	1	0	58.3491	2012-11-05
32600150554041	326001505	54	2	0	13.1061	2012-10-31
32500480254041	325004802	54	2	0	40.2163	2012-10-31
32500440154041	325004401	54	1	0	43.4141	2012-10-31
32500170554041	325001705	54	2	0	19.5455	2012-10-31
32500170254041	325001702	54	2	0	47.4031	2012-10-31
32200870154041	322008701	54	1	0	2.63929	2012-11-12
20705170854041	207051708	54	1	0	8.69268	2012-10-31
32200820154041	322008201	54	1	0	34.2204	2012-11-05
32200750354041	322007503	54	1	0	34.36	2012-11-05
32200230754041	322002307	54	1	0	38.8638	2012-11-05
32200090254041	322000902	54	2	0	34.9049	2012-11-12
32100040254041	321000402	54	2	0	39.8412	2012-11-05
20705270454041	207052704	54	1	0	14.7433	2012-10-31
20704771254041	207047712	54	2	0	9.3525	2012-10-31
20660470154041	206604701	54	1	0	62.8419	2012-11-05
20660150254041	206601502	54	2	0	27.1677	2012-11-05
20302251254041	203022512	54	2	0	24.8104	2012-10-30
20550030254041	205500302	54	2	0	30.8419	2012-11-05
20503950654041	205039506	54	2	0	23.447	2012-11-05
20503801254041	205038012	54	1	0	6.66119	2012-10-30
20402941054041	204029410	54	2	0	23.8713	2012-10-31
20402920954041	204029209	54	1	0	6.17933	2012-10-31
20302320354041	203023203	54	1	0	16.2437	2012-10-30
32900330154041	329003301	54	2	0	43.3785	2012-11-13
32700490254041	327004902	54	2	0	38.8884	2012-11-05
32500020154041	325000201	54	1	0	36.9336	2012-11-13
20660520454041	206605204	54	2	0	14.8227	2012-11-13
32400890154041	324008901	54	1	0	66.3299	2012-11-13
20770060154041	207700601	54	2	0	58.8611	2012-11-12
20705410254041	207054102	54	1	0	33.4292	2012-11-13
20705170754041	207051707	54	2	0	22.8611	2012-11-12
20704930154041	207049301	54	1	0	46.8638	2012-11-13
20503790154041	205037901	54	1	0	58.0315	2012-11-13

## Sheet: April 2009_multiple cytokine
Sample ID	Study ID	Round	Sex	Pf Microscopy Results	Age	Date of Collection
20100350256041	201003502	56	2	0	41.3032	2013-04-22
20100350756041	201003507	56	1	0	7.88775	2013-04-22
20100940256041	201009402	56	2	0	29.8645	2013-04-22
20100990356041	201009903	56	2	0	31.3511	2013-04-16
20201420156041	202014201	56	1	0	41.87	2013-04-16
20302000756041	203020007	56	1	0	9.36893	2013-04-15
20302000956041	203020009	56	1	0	4.53662	2013-04-15
20302040456041	203020404	56	1	0	18.8528	2013-04-15
20302040656041	203020406	56	1	0	13.0897	2013-04-23
20302041056041	203020410	56	1	0	7.87132	2013-04-15
20302110156041	203021101	56	1	0	56.9719	2013-04-22
20302251256041	203022512	56	2	0	25.2676	2013-04-15
20302260156041	203022601	56	2	0	70.2834	2013-04-15
20302260856041	203022608	56	2	0	7.86858	2013-04-15
20302320356041	203023203	56	1	0	16.7009	2013-04-15
20302320656041	203023206	56	2	0	9.1937	2013-04-15
20302520156041	203025201	56	1	0	51.4716	2013-04-23
20330100556041	203301005	56	2	0	10.59	2013-04-15
20402920756041	204029207	56	1	0	10.3984	2013-04-15
20402920956041	204029209	56	1	0	6.63381	2013-04-15
20402930456041	204029304	56	1	0	28.4052	2013-04-23
20402941056041	204029410	56	2	0	24.3258	2013-04-15
20503790156041	205037901	56	1	0	58.4559	2013-04-17
20503790256041	205037902	56	2	0	44.2875	2013-04-17
20503790756041	205037907	56	2	0	8.63244	2013-04-17
20503800856041	205038008	56	2	0	13.8754	2013-04-17
20503800956041	205038009	56	2	0	12.5394	2013-04-17
20503801056041	205038010	56	2	0	10.6229	2013-04-17
20503801256041	205038012	56	1	0	7.12389	2013-04-17
20503801356041	205038013	56	1	0	7.12389	2013-04-17
20503950656041	205039506	56	2	0	23.9097	2013-04-23
20550030256041	205500302	56	2	0	31.3073	2013-04-24
20660150256041	206601502	56	2	0	27.614	2013-04-17
20660470156041	206604701	56	1	0	63.2882	2013-04-17
20660520456041	206605204	56	2	0	15.2635	2013-04-23
20704770256041	207047702	56	2	0	50.2861	2013-04-16
20704771256041	207047712	56	2	0	9.80972	2013-04-16
20704930156041	207049301	56	1	0	47.3073	2013-04-24
20704930256041	207049302	56	2	0	35.3073	2013-04-24
20705170756041	207051707	56	2	0	23.2854	2013-04-16
20705170856041	207051708	56	1	0	9.1718	2013-04-24
20705190556041	207051905	56	2	0	29.2868	2013-04-16
20705200556041	207052005	56	1	0	15.6906	2013-04-24
20705270456041	207052704	56	1	0	15.2225	2013-04-24
20705410256041	207054102	56	1	0	33.8508	2013-04-16
20770060156041	207700601	56	2	0	59.2854	2013-04-16
20770120156041	207701201	56	2	0	4.33949	2013-04-16
32100040256041	321000402	56	2	0	40.3039	2013-04-23
32200090256041	322000902	56	2	0	35.3457	2013-04-22
32200230756041	322002307	56	1	0	39.3265	2013-04-23
32200360556041	322003605	56	2	0	7.69884	2013-04-23
32200750356041	322007503	56	1	0	34.8227	2013-04-23
32200820156041	322008201	56	1	0	34.6639	2013-04-16
32200870156041	322008701	56	1	0	3.08282	2013-04-23
32400120156041	324001201	56	2	0	35.3676	2013-04-15
32400160356041	324001603	56	1	0	32.2628	2013-04-15
32400420156041	324004201	56	1	0	35.0007	2013-04-15
32400420256041	324004202	56	2	0	30.1629	2013-04-15
32400420356041	324004203	56	1	0	10.1054	2013-04-15
32400420556041	324004205	56	1	0	4.6078	2013-04-15
32400460256041	324004602	56	2	0	61.2841	2013-04-15
32400460456041	324004604	56	1	0	29.2019	2013-04-17
32400460556041	324004605	56	2	0	25.5688	2013-04-15
32400461056041	324004610	56	2	0	23.7755	2013-04-15
32400540656041	324005406	56	1	0	10.1958	2013-04-15
32400590156041	324005901	56	1	0	32.4709	2013-04-24
32400590456041	324005904	56	2	0	6.98973	2013-04-15
32400650156041	324006501	56	1	0	34.9733	2013-04-15
32400800256041	324008002	56	2	0	34.9322	2013-04-16
32400890156041	324008901	56	1	0	66.7515	2013-04-16
32400930156041	324009301	56	1	0	52.3477	2013-04-16
32400930256041	324009302	56	2	0	36.6872	2013-04-24
32400930556041	324009305	56	1	0	14.9596	2013-04-15
32401070156041	324010701	56	2	0	33.7248	2013-04-15
32401070356041	324010703	56	1	0	5.79055	2013-04-15
32500020156041	325000201	56	1	0	37.3552	2013-04-16
32500170256041	325001702	56	2	0	47.8631	2013-04-17
32500170456041	325001704	56	2	0	21.692	2013-04-24
32500170556041	325001705	56	2	0	20.0055	2013-04-17
32500170856041	325001708	56	2	0	12.6735	2013-04-16
32500350256041	325003502	56	2	0	47.0363	2013-04-17
32500440156041	325004401	56	1	0	43.8713	2013-04-16
32500480256041	325004802	56	2	0	40.6762	2013-04-17
32500480656041	325004806	56	1	0	9.16632	2013-04-16
32600150556041	326001505	56	2	0	13.5661	2013-04-17
32600300356041	326003003	56	1	0	31.7974	2013-04-22
32600450156041	326004501	56	1	0	58.809	2013-04-22
32600450256041	326004502	56	2	0	47.1869	2013-04-22
32600450456041	326004504	56	2	0	19.3155	2013-04-22
32600510356041	326005103	56	2	0	31.0281	2013-04-17
32600510856041	326005108	56	1	0	15.2334	2013-04-16
32600760156041	326007601	56	2	0	28.4764	2013-04-22
32700060556041	327000605	56	1	0	7.436	2013-04-17
32700080456041	327000804	56	2	0	16.627	2013-04-16
32700490256041	327004902	56	2	0	39.3347	2013-04-17
32700540156041	327005401	56	1	0	63.3895	2013-04-22
32700540656041	327005406	56	1	0	10.0589	2013-04-22
32700540756041	327005407	56	2	0	11.7892	2013-04-22
32700590356041	327005903	56	1	0	4.25736	2013-04-22
32900330156041	329003301	56	2	0	43.822	2013-04-24

## Sheet: October 2008 ES
Sample ID	Study ID	Round	Sex	Pf Microscopy Results	Age	Date of Collection	Matching samples for IFNg		Sample ID	Study ID	Round	Sex	Pf Microscopy Results	Age	Date of Collection
20100140254041	201001402	54	2	0	31.2964	2012-10-29	201003502		20100350254041	201003502	54	2	0	40.8241	2012-10-29
20100170154041	201001701	54	2	0	50.1875	2012-10-29	201003507		20100350754041	201003507	54	1	0	7.40862	2012-10-29
20100350254041	201003502	54	2	0	40.8241	2012-10-29	201009402		20100940254041	201009402	54	2	0	29.4264	2012-11-13
20100350754041	201003507	54	1	0	7.40862	2012-10-29	201009903		20100990354041	201009903	54	2	0	30.8884	2012-10-29
20100530154041	201005301	54	1	0	62.82	2012-10-29	202014201		20201420154041	202014201	54	1	0	41.4073	2012-10-29
20100530254041	201005302	54	2	0	50.3984	2012-10-29	#N/A		20302000754041	203020007	54	1	0	8.9117	2012-10-30
20100530754041	201005307	54	1	0	10.2204	2012-10-29	#N/A		20302000954041	203020009	54	1	0	4.0794	2012-10-30
20100610254041	201006102	54	2	0	37.974	2012-10-29	203020404		20302040454041	203020404	54	1	0	18.3956	2012-10-30
20100610954041	201006109	54	2	0	4.01643	2012-10-29	203020406		20302040654041	203020406	54	1	0	12.6105	2012-10-30
20100750354041	201007503	54	1	0	21.3415	2012-11-12	#N/A		20302041054041	203020410	54	1	0	7.4141	2012-10-30
20100810254041	201008102	54	2	0	40.2327	2012-10-29	203021101		20302110154041	203021101	54	1	0	56.4928	2012-10-29
20100810454041	201008104	54	2	0	19.4251	2012-11-12	#N/A		20302251254041	203022512	54	2	0	24.8104	2012-10-30
20100940254041	201009402	54	2	0	29.4264	2012-11-13	#N/A		20302260154041	203022601	54	2	0	69.8234	2012-10-29
20100990354041	201009903	54	2	0	30.8884	2012-10-29	#N/A		20302260854041	203022608	54	2	0	7.40862	2012-10-29
20201420154041	202014201	54	1	0	41.4073	2012-10-29	203023203		20302320354041	203023203	54	1	0	16.2437	2012-10-30
20220020154041	202200201	54	1	0	38.8966	2012-10-29	203023206		20302320654041	203023206	54	2	0	8.73648	2012-10-30
20220100654041	202201006	54	1	0	3.70705	2012-10-29	203025201		20302520154041	203025201	54	1	0	50.9925	2012-10-30
20302000554041	203020005	54	2	0	10.6064	2012-10-30	203301005		20330100554041	203301005	54	2	0	10.1328	2012-10-30
20302040454041	203020404	54	1	0	18.3956	2012-10-30	204029207		20402920754041	204029207	54	1	0	9.9384	2012-10-29
20302040554041	203020405	54	1	0	15.5784	2012-10-30	204029209		20402920954041	204029209	54	1	0	6.17933	2012-10-31
20302040654041	203020406	54	1	0	12.6105	2012-10-30	204029304		20402930454041	204029304	54	1	0	27.9288	2012-10-31
20302040754041	203020407	54	2	0	10.1711	2012-10-30	#N/A		20402941054041	204029410	54	2	0	23.8713	2012-10-31
20302110154041	203021101	54	1	0	56.4928	2012-10-29	205037901		20503790154041	205037901	54	1	0	58.0315	2012-11-13
20302320354041	203023203	54	1	0	16.2437	2012-10-30	205037902		20503790254041	205037902	54	2	0	43.8412	2012-11-05
20302320554041	203023205	54	2	0	11.1704	2012-10-30	205037907		20503790754041	205037907	54	2	0	8.16975	2012-10-30
20302320654041	203023206	54	2	0	8.73648	2012-10-30	205038008		20503800854041	205038008	54	2	0	13.4127	2012-10-30
20302520154041	203025201	54	1	0	50.9925	2012-10-30	205038009		20503800954041	205038009	54	2	0	12.0767	2012-10-30
20302520754041	203025207	54	2	0	20.2245	2012-11-13	205038010		20503801054041	205038010	54	2	0	10.1602	2012-10-30
20302520854041	203025208	54	1	0	16.3012	2012-10-30	205038012		20503801254041	205038012	54	1	0	6.66119	2012-10-30
20302520954041	203025209	54	2	0	15.3073	2012-10-30	205038013		20503801354041	205038013	54	1	0	6.66119	2012-10-30
20302521154041	203025211	54	1	0	5.54415	2012-11-05	205039506		20503950654041	205039506	54	2	0	23.447	2012-11-05
20330100454041	203301004	54	2	0	29.848	2012-10-30	205500302		20550030254041	205500302	54	2	0	30.8419	2012-11-05
20330100554041	203301005	54	2	0	10.1328	2012-10-30	206601502		20660150254041	206601502	54	2	0	27.1677	2012-11-05
20330100754041	203301007	54	2	0	5.04038	2012-10-30	206604701		20660470154041	206604701	54	1	0	62.8419	2012-11-05
20330140154041	203301401	54	2	0	5.54141	2012-10-30	206605204		20660520454041	206605204	54	2	0	14.8227	2012-11-13
20402650554041	204026505	54	1	0	28.8296	2012-10-31	207047702		20704770254041	207047702	54	2	0	49.8617	2012-11-12
20402651054041	204026510	54	1	0	9.17454	2012-10-31	207047712		20704771254041	207047712	54	2	0	9.3525	2012-10-31
20402651154041	204026511	54	1	0	6.9295	2012-10-31	207049301		20704930154041	207049301	54	1	0	46.8638	2012-11-13
20402670154041	204026701	54	1	0	68.8296	2012-10-31	207049302		20704930254041	207049302	54	2	0	34.8611	2012-11-12
20402670254041	204026702	54	2	0	54.8282	2012-10-31	207051707		20705170754041	207051707	54	2	0	22.8611	2012-11-12
20402670554041	204026705	54	1	0	12.3587	2012-10-31	207051708		20705170854041	207051708	54	1	0	8.69268	2012-10-31
20402750154041	204027501	54	2	0	44.6872	2012-10-31	207051905		20705190554041	207051905	54	2	0	28.8624	2012-11-12
20402750654041	204027506	54	1	0	6.83368	2012-10-31	207052005		20705200554041	207052005	54	1	0	15.2115	2012-10-31
20402920454041	204029204	54	2	0	17.128	2012-10-31	207052704		20705270454041	207052704	54	1	0	14.7433	2012-10-31
20402920654041	204029206	54	2	0	14.2806	2012-10-29	207054102		20705410254041	207054102	54	1	0	33.4292	2012-11-13
20402920754041	204029207	54	1	0	9.9384	2012-10-29	207700601		20770060154041	207700601	54	2	0	58.8611	2012-11-12
20402920854041	204029208	54	2	0	6.60643	2012-10-31	207701201		20770120154041	207701201	54	2	0	3.88227	2012-10-31
20402920954041	204029209	54	1	0	6.17933	2012-10-31	321000402		32100040254041	321000402	54	2	0	39.8412	2012-11-05
20402921054041	204029210	54	2	0	3.95619	2012-10-31	322000902		32200090254041	322000902	54	2	0	34.9049	2012-11-12
20402930454041	204029304	54	1	0	27.9288	2012-10-31	322002307		32200230754041	322002307	54	1	0	38.8638	2012-11-05
20440130154041	204401301	54	1	0	31.2854	2012-10-31	#N/A		32200360554041	322003605	54	2	0	7.2553	2012-11-12
20440130454041	204401304	54	1	0	3.58932	2012-10-31	322007503		32200750354041	322007503	54	1	0	34.36	2012-11-05
20440250154041	204402501	54	1	0	4.62697	2012-11-05	322008201		32200820154041	322008201	54	1	0	34.2204	2012-11-05
20503390154041	205033901	54	1	0	49.8426	2012-11-05	#N/A		32200870154041	322008701	54	1	0	2.63929	2012-11-12
20503680254041	205036802	54	1	0	12.742	2012-10-30	324001201		32400120154041	324001201	54	2	0	34.9076	2012-10-29
20503720654041	205037206	54	1	0	44.3012	2012-11-05	324001603		32400160354041	324001603	54	1	0	31.8029	2012-10-29
20503790154041	205037901	54	1	0	58.0315	2012-11-13	324004201		32400420154041	324004201	54	1	0	34.5435	2012-10-30
20503790254041	205037902	54	2	0	43.8412	2012-11-05	324004202		32400420254041	324004202	54	2	0	29.7029	2012-10-29
20503790554041	205037905	54	1	0	15.1321	2012-10-30	324004203		32400420354041	324004203	54	1	0	9.64545	2012-10-29
20503790754041	205037907	54	2	0	8.16975	2012-10-30	324004205		32400420554041	324004205	54	1	0	4.14784	2012-10-29
20503800154041	205038001	54	1	0	52.8433	2012-11-05	324004602		32400460254041	324004602	54	2	0	60.8241	2012-10-29
20503800254041	205038002	54	2	0	46.8419	2012-11-05	324004604		32400460454041	324004604	54	1	0	28.7392	2012-10-30
20503800754041	205038007	54	2	0	17.8261	2012-10-30	324004605		32400460554041	324004605	54	2	0	25.1116	2012-10-30
20503800854041	205038008	54	2	0	13.4127	2012-10-30	324004610		32400461054041	324004610	54	2	0	23.3155	2012-10-29
20503800954041	205038009	54	2	0	12.0767	2012-10-30	324005406		32400540654041	324005406	54	1	0	9.7358	2012-10-29
20503801054041	205038010	54	2	0	10.1602	2012-10-30	324005901		32400590154041	324005901	54	1	0	31.9863	2012-10-29
20503801254041	205038012	54	1	0	6.66119	2012-10-30	324005904		32400590454041	324005904	54	2	0	6.52977	2012-10-29
20503801354041	205038013	54	1	0	6.66119	2012-10-30	324006501		32400650154041	324006501	54	1	0	34.5133	2012-10-29
20503950654041	205039506	54	2	0	23.447	2012-11-05	324008002		32400800254041	324008002	54	2	0	34.4723	2012-10-30
20503960854041	205039608	54	2	0	8.69815	2012-11-05	324008901		32400890154041	324008901	54	1	0	66.3299	2012-11-13
20503960954041	205039609	54	1	0	7.04175	2012-11-05	324009301		32400930154041	324009301	54	1	0	51.8877	2012-10-30
20503961054041	205039610	54	2	0	4.64066	2012-11-05	324009302		32400930254041	324009302	54	2	0	36.2053	2012-10-30
20550030254041	205500302	54	2	0	30.8419	2012-11-05	324009305		32400930554041	324009305	54	1	0	14.4997	2012-10-29
20550030454041	205500304	54	1	0	4.47912	2012-11-05	324010701		32401070154041	324010701	54	2	0	33.2676	2012-10-30
20604060954041	206040609	54	2	0	11.8193	2012-11-05	324010703		32401070354041	324010703	54	1	0	5.3306	2012-10-29
20604061254041	206040612	54	2	0	7.60027	2012-11-05	325000201		32500020154041	325000201	54	1	0	36.9336	2012-11-13
20604061654041	206040616	54	2	0	5.08966	2012-11-05	325001702		32500170254041	325001702	54	2	0	47.4031	2012-10-31
20604061854041	206040618	54	2	0	2.92676	2012-11-05	325001704		32500170454041	325001704	54	2	0	21.2101	2012-10-30
20604180654041	206041806	54	2	0	11.5127	2012-11-05	325001705		32500170554041	325001705	54	2	0	19.5455	2012-10-31
20604330154041	206043301	54	1	0	56.8652	2012-11-13	325001708		32500170854041	325001708	54	2	0	12.2136	2012-10-30
20604330254041	206043302	54	2	0	46.8419	2012-11-05	325003502		32500350254041	325003502	54	2	0	46.5763	2012-10-31
20604330454041	206043304	54	1	0	9.18549	2012-11-05	325004401		32500440154041	325004401	54	1	0	43.4141	2012-10-31
20604330554041	206043305	54	1	0	7.14305	2012-11-05	325004802		32500480254041	325004802	54	2	0	40.2163	2012-10-31
20604560254041	206045602	54	2	0	42.8419	2012-11-05	325004806		32500480654041	325004806	54	1	0	8.70637	2012-10-30
20604560654041	206045606	54	2	0	17.7577	2012-11-05	326001505		32600150554041	326001505	54	2	0	13.1061	2012-10-31
20660060254041	206600602	54	2	0	29.1745	2012-11-05	326003003		32600300354041	326003003	54	1	0	31.3374	2012-11-05
20660150154041	206601501	54	1	0	31.0308	2012-11-13	326004501		32600450154041	326004501	54	1	0	58.3491	2012-11-05
20660150254041	206601502	54	2	0	27.1677	2012-11-05	326004502		32600450254041	326004502	54	2	0	46.7269	2012-11-05
20660340154041	206603401	54	1	0	4.6653	2012-11-05	326004504		32600450454041	326004504	54	2	0	18.8556	2012-11-05
20660470154041	206604701	54	1	0	62.8419	2012-11-05	326005103		32600510354041	326005103	54	2	0	30.5818	2012-11-05
20660520354041	206605203	54	1	0	17.1335	2012-11-13	326005108		32600510854041	326005108	54	1	0	14.7734	2012-10-30
20660520454041	206605204	54	2	0	14.8227	2012-11-13	326007601		32600760154041	326007601	54	2	0	28.0164	2012-11-05
20660620254041	206606202	54	1	0	5.24298	2012-11-13	327000605		32700060554041	327000605	54	1	0	6.97604	2012-10-31
20704770254041	207047702	54	2	0	49.8617	2012-11-12	327000804		32700080454041	327000804	54	2	0	16.167	2012-10-30
20704771154041	207047711	54	2	0	27.384	2012-11-12	327004902		32700490254041	327004902	54	2	0	38.8884	2012-11-05
20704771254041	207047712	54	2	0	9.3525	2012-10-31	327005401		32700540154041	327005401	54	1	0	62.9295	2012-11-05
20704890454041	207048904	54	1	0	36.7584	2012-11-12	327005406		32700540654041	327005406	54	1	0	9.5989	2012-11-05
20704930154041	207049301	54	1	0	46.8638	2012-11-13	327005407		32700540754041	327005407	54	2	0	11.3292	2012-11-05
20704930254041	207049302	54	2	0	34.8611	2012-11-12	327005903		32700590354041	327005903	54	1	0	3.7974	2012-11-05
20704950154041	207049501	54	2	0	66.8611	2012-11-12	329003301		32900330154041	329003301	54	2	0	43.3785	2012-11-13
20704950954041	207049509	54	2	0	21.2485	2012-11-13
20705170154041	207051701	54	1	0	74.8611	2012-11-12
20705170554041	207051705	54	2	0	24.8268	2012-11-12
20705170754041	207051707	54	2	0	22.8611	2012-11-12			samples that have been tested for multiple cytokines, but not for IFNg
20705170854041	207051708	54	1	0	8.69268	2012-10-31
20705190554041	207051905	54	2	0	28.8624	2012-11-12
20705190654041	207051906	54	2	0	9.99589	2012-10-31
20705190754041	207051907	54	2	0	6.7488	2012-10-31
20705200554041	207052005	54	1	0	15.2115	2012-10-31
20705200754041	207052007	54	2	0	8.00821	2012-10-31
20705230154041	207052301	54	1	0	36.8624	2012-11-12
20705270354041	207052703	54	2	0	18.7023	2012-11-13
20705270454041	207052704	54	1	0	14.7433	2012-10-31
20705270554041	207052705	54	2	0	12.7447	2012-10-31
20705270754041	207052707	54	1	0	7.93977	2012-10-31
20705410254041	207054102	54	1	0	33.4292	2012-11-13
20770030154041	207700301	54	2	0	37.3525	2012-11-13
20770060154041	207700601	54	2	0	58.8611	2012-11-12
20770060454041	207700604	54	2	0	18.3491	2012-10-31
20770120154041	207701201	54	2	0	3.88227	2012-10-31
32100040254041	321000402	54	2	0	39.8412	2012-11-05
32100180454041	321001804	54	1	0	31.4387	2012-11-05
32100181154041	321001811	54	2	0	26.8638	2012-11-05
32100280454041	321002804	54	1	0	29.8782	2012-11-05
32200090154041	322000901	54	1	0	44.397	2012-11-05
32200090254041	322000902	54	2	0	34.9049	2012-11-12
32200220354041	322002203	54	1	0	35.6057	2012-11-05
32200230754041	322002307	54	1	0	38.8638	2012-11-05
32200290354041	322002903	54	1	0	36.1889	2012-10-31
32200310254041	322003102	54	2	0	58.8611	2012-11-12
32200480154041	322004801	54	2	0	45.8973	2012-11-05
32200560354041	322005603	54	2	0	30.0616	2012-11-12
32200730154041	322007301	54	1	0	37.8973	2012-11-05
32200750354041	322007503	54	1	0	34.36	2012-11-05
32200820154041	322008201	54	1	0	34.2204	2012-11-05
32201010154041	322010101	54	2	0	28.5749	2012-11-05
32300370354041	323003703	54	1	0	20.0876	2012-11-13
32300400154041	323004001	54	1	0	76.8433	2012-11-05
32400070354041	324000703	54	1	0	31.9014	2012-10-30
32400120154041	324001201	54	2	0	34.9076	2012-10-29
32400160354041	324001603	54	1	0	31.8029	2012-10-29
32400420154041	324004201	54	1	0	34.5435	2012-10-30
32400420254041	324004202	54	2	0	29.7029	2012-10-29
32400420354041	324004203	54	1	0	9.64545	2012-10-29
32400420454041	324004204	54	1	0	6.83641	2012-10-29
32400420554041	324004205	54	1	0	4.14784	2012-10-29
32400430754041	324004307	54	1	0	45.7358	2012-10-29
32400460154041	324004601	54	1	0	74.9733	2012-10-29
32400460254041	324004602	54	2	0	60.8241	2012-10-29
32400460454041	324004604	54	1	0	28.7392	2012-10-30
32400460554041	324004605	54	2	0	25.1116	2012-10-30
32400460754041	324004607	54	1	0	18.7159	2012-10-30
32400461054041	324004610	54	2	0	23.3155	2012-10-29
32400540254041	324005402	54	2	0	43.4935	2012-10-30
32400540654041	324005406	54	1	0	9.7358	2012-10-29
32400590154041	324005901	54	1	0	31.9863	2012-10-29
32400590254041	324005902	54	2	0	28.7365	2012-10-29
32400590354041	324005903	54	2	0	8.21629	2012-10-29
32400590454041	324005904	54	2	0	6.52977	2012-10-29
32400590654041	324005906	54	1	0	3.90691	2012-10-29
32400650154041	324006501	54	1	0	34.5133	2012-10-29
32400650354041	324006503	54	2	0	8.82136	2012-10-29
32400650554041	324006505	54	1	0	5.39357	2012-10-30
32400800154041	324008001	54	1	0	40.3997	2012-10-30
32400800254041	324008002	54	2	0	34.4723	2012-10-30
32400800454041	324008004	54	1	0	8.64066	2012-10-29
32400800554041	324008005	54	1	0	5.54415	2012-10-29
32400890154041	324008901	54	1	0	66.3299	2012-11-13
32400890254041	324008902	54	2	0	55.2252	2012-10-30
32400930154041	324009301	54	1	0	51.8877	2012-10-30
32400930254041	324009302	54	2	0	36.2053	2012-10-30
32400930554041	324009305	54	1	0	14.4997	2012-10-29
32400930754041	324009307	54	1	0	10.1766	2012-10-29
32401070154041	324010701	54	2	0	33.2676	2012-10-30
32401070354041	324010703	54	1	0	5.3306	2012-10-29
32401170254041	324011702	54	1	0	4	2012-10-29
32500020154041	325000201	54	1	0	36.9336	2012-11-13
32500170254041	325001702	54	2	0	47.4031	2012-10-31
32500170454041	325001704	54	2	0	21.2101	2012-10-30
32500170554041	325001705	54	2	0	19.5455	2012-10-31
32500170654041	325001706	54	2	0	17.2402	2012-10-31
32500170854041	325001708	54	2	0	12.2136	2012-10-30
32500170954041	325001709	54	2	0	9.54689	2012-10-30
32500350154041	325003501	54	1	0	55.9644	2012-11-13
32500350254041	325003502	54	2	0	46.5763	2012-10-31
32500350854041	325003508	54	2	0	14.245	2012-10-30
32500440154041	325004401	54	1	0	43.4141	2012-10-31
32500440354041	325004403	54	2	0	17.4976	2012-10-31
32500440454041	325004404	54	2	0	15.258	2012-10-30
32500440554041	325004405	54	1	0	12.8624	2012-10-30
32500440654041	325004406	54	1	0	9.21561	2012-10-30
32500460154041	325004601	54	2	0	82.5133	2012-10-31
32500480154041	325004801	54	1	0	43.488	2012-10-30
32500480254041	325004802	54	2	0	40.2163	2012-10-31
32500480354041	325004803	54	1	0	21.0075	2012-10-31
32500480554041	325004805	54	1	0	15.5346	2012-10-30
32500480654041	325004806	54	1	0	8.70637	2012-10-30
32600150554041	326001505	54	2	0	13.1061	2012-10-31
32600260254041	326002602	54	2	0	49.0623	2012-11-05
32600260354041	326002603	54	1	0	26.2067	2012-11-13
32600300354041	326003003	54	1	0	31.3374	2012-11-05
32600420154041	326004201	54	2	0	73.8645	2012-11-13
32600420354041	326004203	54	2	0	24.564	2012-10-31
32600430854041	326004308	54	2	0	7.13484	2012-11-05
32600430954041	326004309	54	2	0	4.46543	2012-11-05
32600450154041	326004501	54	1	0	58.3491	2012-11-05
32600450254041	326004502	54	2	0	46.7269	2012-11-05
32600450454041	326004504	54	2	0	18.8556	2012-11-05
32600450554041	326004505	54	2	0	16.5421	2012-11-05
32600450654041	326004506	54	1	0	14.2396	2012-10-31
32600510154041	326005101	54	1	0	59.447	2012-11-05
32600510254041	326005102	54	2	0	51.3347	2012-11-05
32600510354041	326005103	54	2	0	30.5818	2012-11-05
32600510854041	326005108	54	1	0	14.7734	2012-10-30
32600640454041	326006404	54	1	0	15.3155	2012-10-31
32600760154041	326007601	54	2	0	28.0164	2012-11-05
32600760254041	326007602	54	1	0	3.89322	2012-11-05
32700040254041	327000402	54	2	0	68.8296	2012-10-31
32700060354041	327000603	54	1	0	8.85421	2012-10-31
32700060454041	327000604	54	1	0	8.85421	2012-10-31
32700060554041	327000605	54	1	0	6.97604	2012-10-31
32700070754041	327000707	54	2	0	14.4339	2012-10-30
32700080154041	327000801	54	2	0	53.2183	2012-10-31
32700080454041	327000804	54	2	0	16.167	2012-10-30
32700080554041	327000805	54	2	0	11.4196	2012-10-30
32700170254041	327001702	54	2	0	25.1964	2012-11-05
32700490154041	327004901	54	1	0	41.0322	2012-11-05
32700490254041	327004902	54	2	0	38.8884	2012-11-05
32700540154041	327005401	54	1	0	62.9295	2012-11-05
32700540254041	327005402	54	2	0	54.1958	2012-11-05
32700540654041	327005406	54	1	0	9.5989	2012-11-05
32700540754041	327005407	54	2	0	11.3292	2012-11-05
32700560354041	327005603	54	1	0	27.7399	2012-10-31
32700590254041	327005902	54	1	0	5.93292	2012-11-05
32700590354041	327005903	54	1	0	3.7974	2012-11-05
32800090254041	328000902	54	2	0	33.243	2012-11-13
32800310254041	328003102	54	2	0	40.2026	2012-11-12
32800320154041	328003201	54	1	0	37.5934	2012-11-12
32800390254041	328003902	54	2	0	33.7358	2012-11-12
32900330154041	329003301	54	2	0	43.3785	2012-11-13
32900520354041	329005203	54	1	0	25.4565	2012-11-12
33000100454041	330001004	54	2	0	27.5483	2012-11-12
33000260354041	330002603	54	1	0	22.1136	2012-11-12

## Sheet: April 2009 ES
Sample ID	Study ID	Round	Sex	Pf Microscopy Results	Age	Date of Collection	Matching samples for IFNg			Sample ID	Study ID	Round	Sex	Pf Microscopy Results	Age	Date of Collection
20100140256041	201001402	56	2	0	31.7755	2013-04-22	201003502			20100350256041	201003502	56	2	0	41.3032	2013-04-22
20100170156041	201001701	56	2	0	50.6667	2013-04-22	201003507			20100350756041	201003507	56	1	0	7.88775	2013-04-22
20100350256041	201003502	56	2	0	41.3032	2013-04-22	201009402			20100940256041	201009402	56	2	0	29.8645	2013-04-22
20100350756041	201003507	56	1	0	7.88775	2013-04-22	201009903			20100990356041	201009903	56	2	0	31.3511	2013-04-16
20100530156041	201005301	56	1	0	63.2991	2013-04-22	202014201			20201420156041	202014201	56	1	0	41.87	2013-04-16
20100530256041	201005302	56	2	0	50.8775	2013-04-22	#N/A			20302000756041	203020007	56	1	0	9.36893	2013-04-15
20100530756041	201005307	56	1	0	10.6995	2013-04-22	#N/A			20302000956041	203020009	56	1	0	4.53662	2013-04-15
20100610256041	201006102	56	2	0	38.4531	2013-04-22	203020404			20302040456041	203020404	56	1	0	18.8528	2013-04-15
20100610956041	201006109	56	2	0	4.49555	2013-04-22	203020406			20302040656041	203020406	56	1	0	13.0897	2013-04-23
20100750356041	201007503	56	1	0	21.7823	2013-04-22	#N/A			20302041056041	203020410	56	1	0	7.87132	2013-04-15
20100810256041	201008102	56	2	0	40.7118	2013-04-22	203021101			20302110156041	203021101	56	1	0	56.9719	2013-04-22
20100810456041	201008104	56	2	0	19.8658	2013-04-22	#N/A			20302251256041	203022512	56	2	0	25.2676	2013-04-15
20100940256041	201009402	56	2	0	29.8645	2013-04-22	#N/A			20302260156041	203022601	56	2	0	70.2834	2013-04-15
20100990356041	201009903	56	2	0	31.3511	2013-04-16	#N/A			20302260856041	203022608	56	2	0	7.86858	2013-04-15
20201420156041	202014201	56	1	0	41.87	2013-04-16	203023203			20302320356041	203023203	56	1	0	16.7009	2013-04-15
20220020156041	202200201	56	1	0	39.3593	2013-04-16	203023206			20302320656041	203023206	56	2	0	9.1937	2013-04-15
20220100656041	202201006	56	1	0	4.16975	2013-04-16	203025201			20302520156041	203025201	56	1	0	51.4716	2013-04-23
20302000556041	203020005	56	2	0	11.0856	2013-04-23	203301005			20330100556041	203301005	56	2	0	10.59	2013-04-15
20302040456041	203020404	56	1	0	18.8528	2013-04-15	204029207			20402920756041	204029207	56	1	0	10.3984	2013-04-15
20302040556041	203020405	56	1	0	16.0548	2013-04-22	204029209			20402920956041	204029209	56	1	0	6.63381	2013-04-15
20302040656041	203020406	56	1	0	13.0897	2013-04-23	204029304			20402930456041	204029304	56	1	0	28.4052	2013-04-23
20302040756041	203020407	56	2	0	10.6502	2013-04-23	#N/A			20402941056041	204029410	56	2	0	24.3258	2013-04-15
20302110156041	203021101	56	1	0	56.9719	2013-04-22	205037901			20503790156041	205037901	56	1	0	58.4559	2013-04-17
20302320356041	203023203	56	1	0	16.7009	2013-04-15	205037902			20503790256041	205037902	56	2	0	44.2875	2013-04-17
20302320556041	203023205	56	2	0	11.6277	2013-04-15	205037907			20503790756041	205037907	56	2	0	8.63244	2013-04-17
20302320656041	203023206	56	2	0	9.1937	2013-04-15	205038008			20503800856041	205038008	56	2	0	13.8754	2013-04-17
20302520156041	203025201	56	1	0	51.4716	2013-04-23	205038009			20503800956041	205038009	56	2	0	12.5394	2013-04-17
20302520756041	203025207	56	2	0	20.6653	2013-04-23	205038010			20503801056041	205038010	56	2	0	10.6229	2013-04-17
20302520856041	203025208	56	1	0	16.7803	2013-04-23	205038012			20503801256041	205038012	56	1	0	7.12389	2013-04-17
20302520956041	203025209	56	2	0	15.7864	2013-04-23	205038013			20503801356041	205038013	56	1	0	7.12389	2013-04-17
20302521156041	203025211	56	1	0	6.00684	2013-04-23	205039506			20503950656041	205039506	56	2	0	23.9097	2013-04-23
20330100456041	203301004	56	2	0	30.3053	2013-04-15	205500302			20550030256041	205500302	56	2	0	31.3073	2013-04-24
20330100556041	203301005	56	2	0	10.59	2013-04-15	206601502			20660150256041	206601502	56	2	0	27.614	2013-04-17
20330100756041	203301007	56	2	0	5.4976	2013-04-15	206604701			20660470156041	206604701	56	1	0	63.2882	2013-04-17
20330140156041	203301401	56	2	0	5.99863	2013-04-15	206605204			20660520456041	206605204	56	2	0	15.2635	2013-04-23
20402650556041	204026505	56	1	0	29.306	2013-04-23	207047702			20704770256041	207047702	56	2	0	50.2861	2013-04-16
20402651056041	204026510	56	1	0	9.65092	2013-04-23	207047712			20704771256041	207047712	56	2	0	9.80972	2013-04-16
20402651156041	204026511	56	1	0	7.40589	2013-04-23	207049301			20704930156041	207049301	56	1	0	47.3073	2013-04-24
20402670156041	204026701	56	1	0	69.306	2013-04-23	207049302			20704930256041	207049302	56	2	0	35.3073	2013-04-24
20402670256041	204026702	56	2	0	55.3046	2013-04-23	207051707			20705170756041	207051707	56	2	0	23.2854	2013-04-16
20402670556041	204026705	56	1	0	12.835	2013-04-23	207051708			20705170856041	207051708	56	1	0	9.1718	2013-04-24
20402750156041	204027501	56	2	0	45.1417	2013-04-15	207051905			20705190556041	207051905	56	2	0	29.2868	2013-04-16
20402750656041	204027506	56	1	0	7.28816	2013-04-15	207052005			20705200556041	207052005	56	1	0	15.6906	2013-04-24
20402920456041	204029204	56	2	0	17.6044	2013-04-23	207052704			20705270456041	207052704	56	1	0	15.2225	2013-04-24
20402920656041	204029206	56	2	0	14.7406	2013-04-15	207054102			20705410256041	207054102	56	1	0	33.8508	2013-04-16
20402920756041	204029207	56	1	0	10.3984	2013-04-15	207700601			20770060156041	207700601	56	2	0	59.2854	2013-04-16
20402920856041	204029208	56	2	0	7.08282	2013-04-23	207701201			20770120156041	207701201	56	2	0	4.33949	2013-04-16
20402920956041	204029209	56	1	0	6.63381	2013-04-15	321000402			32100040256041	321000402	56	2	0	40.3039	2013-04-23
20402921056041	204029210	56	2	0	4.41068	2013-04-15	322000902			32200090256041	322000902	56	2	0	35.3457	2013-04-22
20402930456041	204029304	56	1	0	28.4052	2013-04-23	322002307			32200230756041	322002307	56	1	0	39.3265	2013-04-23
20440130156041	204401301	56	1	0	31.7399	2013-04-15	#N/A			32200360556041	322003605	56	2	0	7.69884	2013-04-23
20440130456041	204401304	56	1	0	4.04381	2013-04-15	322007503			32200750356041	322007503	56	1	0	34.8227	2013-04-23
20440250156041	204402501	56	1	0	5.06776	2013-04-15	322008201			32200820156041	322008201	56	1	0	34.6639	2013-04-16
20503390156041	205033901	56	1	0	50.3025	2013-04-22	#N/A			32200870156041	322008701	56	1	0	3.08282	2013-04-23
20503680256041	205036802	56	1	0	13.2211	2013-04-23	324001201			32400120156041	324001201	56	2	0	35.3676	2013-04-15
20503720656041	205037206	56	1	0	44.7611	2013-04-22	324001603			32400160356041	324001603	56	1	0	32.2628	2013-04-15
20503790156041	205037901	56	1	0	58.4559	2013-04-17	324004201			32400420156041	324004201	56	1	0	35.0007	2013-04-15
20503790256041	205037902	56	2	0	44.2875	2013-04-17	324004202			32400420256041	324004202	56	2	0	30.1629	2013-04-15
20503790556041	205037905	56	1	0	15.5948	2013-04-17	324004203			32400420356041	324004203	56	1	0	10.1054	2013-04-15
20503790756041	205037907	56	2	0	8.63244	2013-04-17	324004205			32400420556041	324004205	56	1	0	4.6078	2013-04-15
20503800156041	205038001	56	1	0	53.2895	2013-04-17	324004602			32400460256041	324004602	56	2	0	61.2841	2013-04-15
20503800256041	205038002	56	2	0	47.2882	2013-04-17	324004604			32400460456041	324004604	56	1	0	29.2019	2013-04-17
20503800756041	205038007	56	2	0	18.2888	2013-04-17	324004605			32400460556041	324004605	56	2	0	25.5688	2013-04-15
20503800856041	205038008	56	2	0	13.8754	2013-04-17	324004610			32400461056041	324004610	56	2	0	23.7755	2013-04-15
20503800956041	205038009	56	2	0	12.5394	2013-04-17	324005406			32400540656041	324005406	56	1	0	10.1958	2013-04-15
20503801056041	205038010	56	2	0	10.6229	2013-04-17	324005901			32400590156041	324005901	56	1	0	32.4709	2013-04-24
20503801256041	205038012	56	1	0	7.12389	2013-04-17	324005904			32400590456041	324005904	56	2	0	6.98973	2013-04-15
20503801356041	205038013	56	1	0	7.12389	2013-04-17	324006501			32400650156041	324006501	56	1	0	34.9733	2013-04-15
20503950656041	205039506	56	2	0	23.9097	2013-04-23	324008002			32400800256041	324008002	56	2	0	34.9322	2013-04-16
20503960856041	205039608	56	2	0	9.14442	2013-04-17	324008901			32400890156041	324008901	56	1	0	66.7515	2013-04-16
20503960956041	205039609	56	1	0	7.48802	2013-04-17	324009301			32400930156041	324009301	56	1	0	52.3477	2013-04-16
20503961056041	205039610	56	2	0	5.08693	2013-04-17	324009302			32400930256041	324009302	56	2	0	36.6872	2013-04-24
20550030256041	205500302	56	2	0	31.3073	2013-04-24	324009305			32400930556041	324009305	56	1	0	14.9596	2013-04-15
20550030456041	205500304	56	1	0	4.94456	2013-04-24	324010701			32401070156041	324010701	56	2	0	33.7248	2013-04-15
20604060956041	206040609	56	2	0	12.2656	2013-04-17	324010703			32401070356041	324010703	56	1	0	5.79055	2013-04-15
20604061256041	206040612	56	2	0	8.04654	2013-04-17	325000201			32500020156041	325000201	56	1	0	37.3552	2013-04-16
20604061656041	206040616	56	2	0	5.53593	2013-04-17	325001702			32500170256041	325001702	56	2	0	47.8631	2013-04-17
20604061856041	206040618	56	2	0	3.37303	2013-04-17	325001704			32500170456041	325001704	56	2	0	21.692	2013-04-24
20604180656041	206041806	56	2	0	11.9589	2013-04-17	325001705			32500170556041	325001705	56	2	0	20.0055	2013-04-17
20604330156041	206043301	56	1	0	57.2895	2013-04-17	325001708			32500170856041	325001708	56	2	0	12.6735	2013-04-16
20604330256041	206043302	56	2	0	47.2882	2013-04-17	325003502			32500350256041	325003502	56	2	0	47.0363	2013-04-17
20604330456041	206043304	56	1	0	9.64819	2013-04-23	325004401			32500440156041	325004401	56	1	0	43.8713	2013-04-16
20604330556041	206043305	56	1	0	7.58932	2013-04-17	325004802			32500480256041	325004802	56	2	0	40.6762	2013-04-17
20604560256041	206045602	56	2	0	43.3073	2013-04-24	325004806			32500480656041	325004806	56	1	0	9.16632	2013-04-16
20604560656041	206045606	56	2	0	18.2204	2013-04-23	326001505			32600150556041	326001505	56	2	0	13.5661	2013-04-17
20660060256041	206600602	56	2	0	29.6208	2013-04-17	326003003			32600300356041	326003003	56	1	0	31.7974	2013-04-22
20660150156041	206601501	56	1	0	31.4552	2013-04-17	326004501			32600450156041	326004501	56	1	0	58.809	2013-04-22
20660150256041	206601502	56	2	0	27.614	2013-04-17	326004502			32600450256041	326004502	56	2	0	47.1869	2013-04-22
20660340156041	206603401	56	1	0	5.11157	2013-04-17	326004504			32600450456041	326004504	56	2	0	19.3155	2013-04-22
20660470156041	206604701	56	1	0	63.2882	2013-04-17	326005103			32600510356041	326005103	56	2	0	31.0281	2013-04-17
20660520356041	206605203	56	1	0	17.5743	2013-04-23	326005108			32600510856041	326005108	56	1	0	15.2334	2013-04-16
20660520456041	206605204	56	2	0	15.2635	2013-04-23	326007601			32600760156041	326007601	56	2	0	28.4764	2013-04-22
20660620256041	206606202	56	1	0	5.68378	2013-04-23	327000605			32700060556041	327000605	56	1	0	7.436	2013-04-17
20704770256041	207047702	56	2	0	50.2861	2013-04-16	327000804			32700080456041	327000804	56	2	0	16.627	2013-04-16
20704771156041	207047711	56	2	0	27.8084	2013-04-16	327004902			32700490256041	327004902	56	2	0	39.3347	2013-04-17
20704771256041	207047712	56	2	0	9.80972	2013-04-16	327005401			32700540156041	327005401	56	1	0	63.3895	2013-04-22
20704890456041	207048904	56	1	0	37.2019	2013-04-23	327005406			32700540656041	327005406	56	1	0	10.0589	2013-04-22
20704930156041	207049301	56	1	0	47.3073	2013-04-24	327005407			32700540756041	327005407	56	2	0	11.7892	2013-04-22
20704930256041	207049302	56	2	0	35.3073	2013-04-24	327005903			32700590356041	327005903	56	1	0	4.25736	2013-04-22
20704950156041	207049501	56	2	0	67.3073	2013-04-24	329003301			32900330156041	329003301	56	2	0	43.822	2013-04-24
20704950956041	207049509	56	2	0	21.6701	2013-04-16
20705170156041	207051701	56	1	0	75.3073	2013-04-24
20705170556041	207051705	56	2	0	25.2512	2013-04-16			samples that have been tested for multiple cytokines, but not for IFNg
20705170756041	207051707	56	2	0	23.2854	2013-04-16
20705170856041	207051708	56	1	0	9.1718	2013-04-24
20705190556041	207051905	56	2	0	29.2868	2013-04-16
20705190656041	207051906	56	2	0	10.4531	2013-04-16
20705190756041	207051907	56	2	0	7.20602	2013-04-16
20705200556041	207052005	56	1	0	15.6906	2013-04-24
20705200756041	207052007	56	2	0	8.46543	2013-04-16
20705230156041	207052301	56	1	0	37.2868	2013-04-16
20705270356041	207052703	56	2	0	19.1403	2013-04-22
20705270456041	207052704	56	1	0	15.2225	2013-04-24
20705270556041	207052705	56	2	0	13.2019	2013-04-16
20705270756041	207052707	56	1	0	8.41889	2013-04-24
20705410256041	207054102	56	1	0	33.8508	2013-04-16
20770030156041	207700301	56	2	0	37.7741	2013-04-16
20770060156041	207700601	56	2	0	59.2854	2013-04-16
20770060456041	207700604	56	2	0	18.8282	2013-04-24
20770120156041	207701201	56	2	0	4.33949	2013-04-16
32100040256041	321000402	56	2	0	40.3039	2013-04-23
32100180456041	321001804	56	1	0	31.9014	2013-04-23
32100181156041	321001811	56	2	0	27.3265	2013-04-23
32100280456041	321002804	56	1	0	30.3409	2013-04-23
32200090156041	322000901	56	1	0	44.8569	2013-04-22
32200090256041	322000902	56	2	0	35.3457	2013-04-22
32200220356041	322002203	56	1	0	36.0684	2013-04-23
32200230756041	322002307	56	1	0	39.3265	2013-04-23
32200290356041	322002903	56	1	0	36.6626	2013-04-22
32200310256041	322003102	56	2	0	59.3046	2013-04-23
32200480156041	322004801	56	2	0	46.36	2013-04-23
32200560356041	322005603	56	2	0	30.5051	2013-04-23
32200730156041	322007301	56	1	0	38.36	2013-04-23
32200750356041	322007503	56	1	0	34.8227	2013-04-23
32200820156041	322008201	56	1	0	34.6639	2013-04-16
32201010156041	322010101	56	2	0	29.0376	2013-04-23
32300370356041	323003703	56	1	0	20.5284	2013-04-23
32300400156041	323004001	56	1	0	77.3032	2013-04-22
32400070356041	324000703	56	1	0	32.3587	2013-04-15
32400120156041	324001201	56	2	0	35.3676	2013-04-15
32400160356041	324001603	56	1	0	32.2628	2013-04-15
32400420156041	324004201	56	1	0	35.0007	2013-04-15
32400420256041	324004202	56	2	0	30.1629	2013-04-15
32400420356041	324004203	56	1	0	10.1054	2013-04-15
32400420456041	324004204	56	1	0	7.29637	2013-04-15
32400420556041	324004205	56	1	0	4.6078	2013-04-15
32400430756041	324004307	56	1	0	46.2204	2013-04-24
32400460156041	324004601	56	1	0	75.4333	2013-04-15
32400460256041	324004602	56	2	0	61.2841	2013-04-15
32400460456041	324004604	56	1	0	29.2019	2013-04-17
32400460556041	324004605	56	2	0	25.5688	2013-04-15
32400460756041	324004607	56	1	0	19.1732	2013-04-15
32400461056041	324004610	56	2	0	23.7755	2013-04-15
32400540256041	324005402	56	2	0	43.9507	2013-04-15
32400540656041	324005406	56	1	0	10.1958	2013-04-15
32400590156041	324005901	56	1	0	32.4709	2013-04-24
32400590256041	324005902	56	2	0	29.1964	2013-04-15
32400590356041	324005903	56	2	0	8.67625	2013-04-15
32400590456041	324005904	56	2	0	6.98973	2013-04-15
32400590656041	324005906	56	1	0	4.36687	2013-04-15
32400650156041	324006501	56	1	0	34.9733	2013-04-15
32400650356041	324006503	56	2	0	9.28131	2013-04-15
32400650556041	324006505	56	1	0	5.85079	2013-04-15
32400800156041	324008001	56	1	0	40.8597	2013-04-16
32400800256041	324008002	56	2	0	34.9322	2013-04-16
32400800456041	324008004	56	1	0	9.10335	2013-04-16
32400800556041	324008005	56	1	0	6.00684	2013-04-16
32400890156041	324008901	56	1	0	66.7515	2013-04-16
32400890256041	324008902	56	2	0	55.6851	2013-04-16
32400930156041	324009301	56	1	0	52.3477	2013-04-16
32400930256041	324009302	56	2	0	36.6872	2013-04-24
32400930556041	324009305	56	1	0	14.9596	2013-04-15
32400930756041	324009307	56	1	0	10.6393	2013-04-16
32401070156041	324010701	56	2	0	33.7248	2013-04-15
32401070356041	324010703	56	1	0	5.79055	2013-04-15
32401170256041	324011702	56	1	0	4.4627	2013-04-16
32500020156041	325000201	56	1	0	37.3552	2013-04-16
32500170256041	325001702	56	2	0	47.8631	2013-04-17
32500170456041	325001704	56	2	0	21.692	2013-04-24
32500170556041	325001705	56	2	0	20.0055	2013-04-17
32500170656041	325001706	56	2	0	17.7194	2013-04-24
32500170856041	325001708	56	2	0	12.6735	2013-04-16
32500170956041	325001709	56	2	0	10.0096	2013-04-17
32500350156041	325003501	56	1	0	56.386	2013-04-16
32500350256041	325003502	56	2	0	47.0363	2013-04-17
32500350856041	325003508	56	2	0	14.705	2013-04-16
32500440156041	325004401	56	1	0	43.8713	2013-04-16
32500440356041	325004403	56	2	0	17.9548	2013-04-16
32500440456041	325004404	56	2	0	15.718	2013-04-16
32500440556041	325004405	56	1	0	13.3251	2013-04-17
32500440656041	325004406	56	1	0	9.67556	2013-04-16
32500460156041	325004601	56	2	0	82.9733	2013-04-17
32500480156041	325004801	56	1	0	43.948	2013-04-16
32500480256041	325004802	56	2	0	40.6762	2013-04-17
32500480356041	325004803	56	1	0	21.4675	2013-04-17
32500480556041	325004805	56	1	0	15.9945	2013-04-16
32500480656041	325004806	56	1	0	9.16632	2013-04-16
32600150556041	326001505	56	2	0	13.5661	2013-04-17
32600260256041	326002602	56	2	0	49.5222	2013-04-22
32600260356041	326002603	56	1	0	26.6448	2013-04-22
32600300356041	326003003	56	1	0	31.7974	2013-04-22
32600420156041	326004201	56	2	0	74.3025	2013-04-22
32600420356041	326004203	56	2	0	25.0376	2013-04-22
32600430856041	326004308	56	2	0	7.5948	2013-04-22
32600430956041	326004309	56	2	0	4.92539	2013-04-22
32600450156041	326004501	56	1	0	58.809	2013-04-22
32600450256041	326004502	56	2	0	47.1869	2013-04-22
32600450456041	326004504	56	2	0	19.3155	2013-04-22
32600450556041	326004505	56	2	0	17.0021	2013-04-22
32600450656041	326004506	56	1	0	14.7132	2013-04-22
32600510156041	326005101	56	1	0	59.9069	2013-04-22
32600510256041	326005102	56	2	0	51.7947	2013-04-22
32600510356041	326005103	56	2	0	31.0281	2013-04-17
32600510856041	326005108	56	1	0	15.2334	2013-04-16
32600640456041	326006404	56	1	0	15.7919	2013-04-23
32600760156041	326007601	56	2	0	28.4764	2013-04-22
32600760256041	326007602	56	1	0	4.35318	2013-04-22
32700040256041	327000402	56	2	0	69.2895	2013-04-17
32700060356041	327000603	56	1	0	9.31417	2013-04-17
32700060456041	327000604	56	1	0	9.31417	2013-04-17
32700060556041	327000605	56	1	0	7.436	2013-04-17
32700070756041	327000707	56	2	0	14.8939	2013-04-16
32700080156041	327000801	56	2	0	53.6783	2013-04-17
32700080456041	327000804	56	2	0	16.627	2013-04-16
32700080556041	327000805	56	2	0	11.8823	2013-04-17
32700170256041	327001702	56	2		25.6564	2013-04-22
32700490156041	327004901	56	1	0	41.4921	2013-04-22
32700490256041	327004902	56	2	0	39.3347	2013-04-17
32700540156041	327005401	56	1	0	63.3895	2013-04-22
32700540256041	327005402	56	2	0	54.6557	2013-04-22
32700540656041	327005406	56	1	0	10.0589	2013-04-22
32700540756041	327005407	56	2	0	11.7892	2013-04-22
32700560356041	327005603	56	1	0	28.1999	2013-04-17
32700590256041	327005902	56	1	0	6.39288	2013-04-22
32700590356041	327005903	56	1	0	4.25736	2013-04-22
32800090256041	328000902	56	2	0	33.6865	2013-04-24
32800310256041	328003102	56	2	0	40.6489	2013-04-24
32800320156041	328003201	56	1	0	38.0397	2013-04-24
32800390256041	328003902	56	2	0	34.1821	2013-04-24
32900330156041	329003301	56	2	0	43.822	2013-04-24
32900520356041	329005203	56	1	0	25.8973	2013-04-22
33000100456041	330001004	56	2	0	27.9945	2013-04-24
33000260356041	330002603	56	1	0	22.5599	2013-04-24

## Sheet: Plate 1
Sample ID	Study ID	Round	Sex	Pf Microscopy Results	Age	Date of Collection	Plate position	P.Falc72 (12)	p.ovale (14)	p.malariae (30)	p.vivax (37)	p.falc73 (78)
20100140254041	201001402	54	2	0	31.2964	2012-10-29	A1	13	12	14	15	18
20100170154041	201001701	54	2	0	50.1875	2012-10-29	B1	9	16	11	13	12
20100350254041	201003502	54	2	0	40.8241	2012-10-29	C1	9	9	8	9	12
20100350754041	201003507	54	1	0	7.40862	2012-10-29	D1	15.5	14	11	15	17.5
20100530154041	201005301	54	1	0	62.82	2012-10-29	E1	12.5	16	6	15	17
20100530254041	201005302	54	2	0	50.3984	2012-10-29	F1	17	12	13	12	16
20100530754041	201005307	54	1	0	10.2204	2012-10-29	G1	16.5	20	13	16	16
20100610254041	201006102	54	2	0	37.974	2012-10-29	H1	15	17	5	13	23
20100610954041	201006109	54	2	0	4.01643	2012-10-29	A2	20	15	17	15.5	24
20100750354041	201007503	54	1	0	21.3415	2012-11-12	B2	14	18.5	17	15	18
20100810254041	201008102	54	2	0	40.2327	2012-10-29	not found
20100810454041	201008104	54	2	0	19.4251	2012-11-12	not found
20100940254041	201009402	54	2	0	29.4264	2012-11-13	C2	14.5	1751	10	18	13
20100990354041	201009903	54	2	0	30.8884	2012-10-29	D2	19	224	12	11.5	17
20201420154041	202014201	54	1	0	41.4073	2012-10-29	E2	14	16	12	14.5	19.5
20220020154041	202200201	54	1	0	38.8966	2012-10-29	F2	14	58	8	17	21
20220100654041	202201006	54	1	0	3.70705	2012-10-29	G2	14.5	18.5	14	17.5	19
20302000554041	203020005	54	2	0	10.6064	2012-10-30	H2	21	20	12	18	13
20302040454041	203020404	54	1	0	18.3956	2012-10-30	A3	17.5	656	16.5	19	20
20302040554041	203020405	54	1	0	15.5784	2012-10-30	B3	11.5	362.5	12	11.5	21
20302040654041	203020406	54	1	0	12.6105	2012-10-30	C3	14	509	9	19	323
20302040754041	203020407	54	2	0	10.1711	2012-10-30	D3	15	12	11	12.5	14
20302110154041	203021101	54	1	0	56.4928	2012-10-29	E3	9.5	17.5	11	16	17
20302320354041	203023203	54	1	0	16.2437	2012-10-30	F3	12	12.5	15	16.5	18
20302320554041	203023205	54	2	0	11.1704	2012-10-30	G3	12	12.5	13	15	14.5
20302320654041	203023206	54	2	0	8.73648	2012-10-30	H3	13	12.5	9	11	13
20302520154041	203025201	54	1	0	50.9925	2012-10-30	A4	14	852	14	16	21
20302520754041	203025207	54	2	0	20.2245	2012-11-13	B4	20	20	13	16.5	20
20302520854041	203025208	54	1	0	16.3012	2012-10-30	C4	17	14	15	12	16
20302520954041	203025209	54	2	0	15.3073	2012-10-30	D4	16	13	15	15.5	23
20302521154041	203025211	54	1	0	5.54415	2012-11-05	E4	14	176	12	16	19
20330100454041	203301004	54	2	0	29.848	2012-10-30	F4	15	14	11	15.5	15
20330100554041	203301005	54	2	0	10.1328	2012-10-30	G4	17	507	16	16	19
20330100754041	203301007	54	2	0	5.04038	2012-10-30	H4	20	13.5	14	13.5	19
20330140154041	203301401	54	2	0	5.54141	2012-10-30	A5	11	492.5	14	12	17
20402650554041	204026505	54	1	0	28.8296	2012-10-31	B5	15.5	15	16.5	12	869
20402651054041	204026510	54	1	0	9.17454	2012-10-31	C5	17	10	12	15	17
20402651154041	204026511	54	1	0	6.9295	2012-10-31	not found
20402670154041	204026701	54	1	0	68.8296	2012-10-31	D5	19	13.5	17	18	19
20402670254041	204026702	54	2	0	54.8282	2012-10-31	E5	12	18.5	13	11	17
20402670554041	204026705	54	1	0	12.3587	2012-10-31	F5	13	14.5	13	14	19
20402750154041	204027501	54	2	0	44.6872	2012-10-31	G5	15	10.5	8	11	17.5
20402750654041	204027506	54	1	0	6.83368	2012-10-31	H5	15	14.5	15	13	13
20402920454041	204029204	54	2	0	17.128	2012-10-31	A6	17	421	17.5	19	21
20402920654041	204029206	54	2	0	14.2806	2012-10-29	B6	16	16	11	14	9
20402920754041	204029207	54	1	0	9.9384	2012-10-29	C6	14	15	15	14	15
20402920854041	204029208	54	2	0	6.60643	2012-10-31	D6	16.5	12.5	10.5	13.5	19
20402920954041	204029209	54	1	0	6.17933	2012-10-31	E6	15.5	13.5	13	16	16.5
20402921054041	204029210	54	2	0	3.95619	2012-10-31	F6	10	18.5	11	19.5	17
20402930454041	204029304	54	1	0	27.9288	2012-10-31	G6	13.5	13	14.5	12	17
20440130154041	204401301	54	1	0	31.2854	2012-10-31	H6	16	21	10	17	14
20440130454041	204401304	54	1	0	3.58932	2012-10-31	A7	15	18	12	17	23
20440250154041	204402501	54	1	0	4.62697	2012-11-05	B7	14.5	15	14	15.5	18.5
20503390154041	205033901	54	1	0	49.8426	2012-11-05	C7	17	665.5	11	22	17
20503680254041	205036802	54	1	0	12.742	2012-10-30	D7	14	17	11.5	10	16
20503720654041	205037206	54	1	0	44.3012	2012-11-05	E7	18.5	622	13	18	17
20503790154041	205037901	54	1	0	58.0315	2012-11-13	F7	14	14	13.5	10	21
20503790254041	205037902	54	2	0	43.8412	2012-11-05	G7	16	18	16	14	19
20503790554041	205037905	54	1	0	15.1321	2012-10-30	H7	15	3136.5	9	21.5	23
20503790754041	205037907	54	2	0	8.16975	2012-10-30	A8	18	17.5	16	16	17
20503800154041	205038001	54	1	0	52.8433	2012-11-05	B8	14.5	1154.5	15	18	16
20503800254041	205038002	54	2	0	46.8419	2012-11-05	C8	12	13	11	15	17
20503800754041	205038007	54	2	0	17.8261	2012-10-30	D8	20	18	13	16	21
20503800854041	205038008	54	2	0	13.4127	2012-10-30	E8	12	18	12	15	15.5
20503800954041	205038009	54	2	0	12.0767	2012-10-30	F8	15.5	17	15	12	14
20503801054041	205038010	54	2	0	10.1602	2012-10-30	G8	12	15	14	17	16
20503801254041	205038012	54	1	0	6.66119	2012-10-30	H8	8	14	13	12	19
20503801354041	205038013	54	1	0	6.66119	2012-10-30	A9	18	23	12	17	17
20503950654041	205039506	54	2	0	23.447	2012-11-05	B9	20	14	10	14.5	21
20503960854041	205039608	54	2	0	8.69815	2012-11-05	C9	16	2640	13	18	17
20503960954041	205039609	54	1	0	7.04175	2012-11-05	D9	10	19.5	13	17	17
20503961054041	205039610	54	2	0	4.64066	2012-11-05	E9	10	2122	12	15	17
							p.malariae	17	19	4287	22	15.5
							p.vivax	14	15	10	3884	18.5
							p.ovale	14	4389	9	17	19.5
							p.falc 72	1719	13	13	13	13
							p.falc 73	15.5	14	34	12	2573.5
							No DNA	14	18	14	14	18
							No DNA	14	13	19	16.5	22
							No DNA	13	12	11	20.5	17
							No ligase	9	8	5	5	7.5
							No ligase	3	2	8.5	4	8
							No ligase	6.5	3	1	7	6

## Sheet: Plate 2
Sample ID	Study ID	Round	Sex	Pf Microscopy Results	Age	Date of Collection	Plate position	Comments	P.Falc72 (12)	p.ovale (14)	p.malariae (30)	p.vivax (37)	p.falc73 (78)
20550030254041	205500302	54	2	0	30.8419	2012-11-05	A1		7	5	5	5	10
20550030454041	205500304	54	1	0	4.47912	2012-11-05	B1		5	4.5	3	4	8
20604060954041	206040609	54	2	0	11.8193	2012-11-05	C1		4.5	8	7	3	9
20604061254041	206040612	54	2	0	7.60027	2012-11-05	D1		4	3	4	3	8
20604061654041	206040616	54	2	0	5.08966	2012-11-05	E1		3	7	4.5	9.5	10
20604061854041	206040618	54	2	0	2.92676	2012-11-05	F1		6	8	5	4	9
20604180654041	206041806	54	2	0	11.5127	2012-11-05	G1		5.5	7	3	7	8
20604330154041	206043301	54	1	0	56.8652	2012-11-13	H1		6	7	6	5	10
20604330254041	206043302	54	2	0	46.8419	2012-11-05	A2		2	7	7	7	8
20604330454041	206043304	54	1	0	9.18549	2012-11-05	B2		6	7	2	4	9
20604330554041	206043305	54	1	0	7.14305	2012-11-05	C2		5	7	4	6	8
20604560254041	206045602	54	2	0	42.8419	2012-11-05	D2		2	8	5.5	8	8
20604560654041	206045606	54	2	0	17.7577	2012-11-05	E2		4	7	6	4.5	9.5
20660060254041	206600602	54	2	0	29.1745	2012-11-05	F2		6	5	3	5	5
20660150154041	206601501	54	1	0	31.0308	2012-11-13	G2		4	4	3	6	9
20660150254041	206601502	54	2	0	27.1677	2012-11-05	H2		6	6	5	7	8.5
20660340154041	206603401	54	1	0	4.6653	2012-11-05	A3		4	5	1	7	8
20660470154041	206604701	54	1	0	62.8419	2012-11-05	B3		3.5	7	6	7	10
20660520354041	206605203	54	1	0	17.1335	2012-11-13	C3		5	4.5	3	8	8
20660520454041	206605204	54	2	0	14.8227	2012-11-13	D3		6.5	6	7	9	8.5
20660620254041	206606202	54	1	0	5.24298	2012-11-13	E3		6	5	6	4	11
20704770254041	207047702	54	2	0	49.8617	2012-11-12	F3		6	5.5	7	8	1038.5
20704771154041	207047711	54	2	0	27.384	2012-11-12	G3		8.5	9	4	4	7
20704771254041	207047712	54	2	0	9.3525	2012-10-31	H3		5	7	5	6	9
20704890454041	207048904	54	1	0	36.7584	2012-11-12	A4		3	9	8	8	5
20704930154041	207049301	54	1	0	46.8638	2012-11-13	B4		5.5	4	3.5	7	6
20704930254041	207049302	54	2	0	34.8611	2012-11-12	C4		6	5	8	5.5	8
20704950154041	207049501	54	2	0	66.8611	2012-11-12	D4		7	161	4	2	7
20704950954041	207049509	54	2	0	21.2485	2012-11-13	E4		2	6	1284	4	9
20705170154041	207051701	54	1	0	74.8611	2012-11-12	F4		4	4	5	8	7.5
20705170554041	207051705	54	2	0	24.8268	2012-11-12	G4		9	3	6	5	10
20705170754041	207051707	54	2	0	22.8611	2012-11-12	H4		6	6	8	5	7
20705170854041	207051708	54	1	0	8.69268	2012-10-31	A5		6	8	7	3	8
20705190554041	207051905	54	2	0	28.8624	2012-11-12	B5		8	8	11	5	8
20705190654041	207051906	54	2	0	9.99589	2012-10-31	C5		5.5	6.5	6	754	7
20705190754041	207051907	54	2	0	6.7488	2012-10-31	D5		3	4	4	6	10
20705200554041	207052005	54	1	0	15.2115	2012-10-31	E5		5	7	3	6	11
20705200754041	207052007	54	2	0	8.00821	2012-10-31	F5		8	3	5	5	5
20705230154041	207052301	54	1	0	36.8624	2012-11-12	G5		5	6	5	6	7
20705270354041	207052703	54	2	0	18.7023	2012-11-13	H5		10	6	8	2	7
20705270454041	207052704	54	1	0	14.7433	2012-10-31	A6		6	6	5	6	8
20705270554041	207052705	54	2	0	12.7447	2012-10-31	B6		7	5.5	6	5	9
20705270754041	207052707	54	1	0	7.93977	2012-10-31	C6		4	7	4	5	7.5
20705410254041	207054102	54	1	0	33.4292	2012-11-13	D6		9	3	4	9	9
20770030154041	207700301	54	2	0	37.3525	2012-11-13	E6		9.5	3	6	6	8
20770060154041	207700601	54	2	0	58.8611	2012-11-12	F6		6.5	7	4	7	10
20770060454041	207700604	54	2	0	18.3491	2012-10-31	G6		4	6	3	6	8.5
20770120154041	207701201	54	2	0	3.88227	2012-10-31	H6		4.5	5.5	3	5	8
32100040254041	321000402	54	2	0	39.8412	2012-11-05	A7		4	2	5	5	7
32100180454041	321001804	54	1	0	31.4387	2012-11-05	B7		4	5	2	7	8
32100181154041	321001811	54	2	0	26.8638	2012-11-05	C7		5.5	6	5	3	5
32100280454041	321002804	54	1	0	29.8782	2012-11-05	D7		5	7	7.5	5	5
32200220354041	322002203	54	1	0	35.6057	2012-11-05	E7		6	5	4	6	9
32200090154041	322000901	54	1	0	44.397	2012-11-05	F7		7	4	5	5	3
32200090254041	322000902	54	2	0	34.9049	2012-11-12	G7		6	6	8	2.5	6
32200230754041	322002307	54	1	0	38.8638	2012-11-05	H7		8	6	4	10	9
32200290354041	322002903	54	1	0	36.1889	2012-10-31	A8		7	7.5	3	9	7
32200310254041	322003102	54	2	0	58.8611	2012-11-12	B8		5	4	4	6	9.5
32200480154041	322004801	54	2	0	45.8973	2012-11-05	C8		7	5	5	3	7.5
32200560354041	322005603	54	2	0	30.0616	2012-11-12	D8		5	5.5	6	4	6
32200730154041	322007301	54	1	0	37.8973	2012-11-05	E8		8	5	5	7.5	8
32200750354041	322007503	54	1	0	34.36	2012-11-05	F8		5	6	3	3	5
32200820154041	322008201	54	1	0	34.2204	2012-11-05	G8		4	4	3	6	8
32201010154041	322010101	54	2	0	28.5749	2012-11-05	H8		6	1	4	3	5
32300370354041	323003703	54	1	0	20.0876	2012-11-13	A9		6	3	5	6	8
32300400154041	323004001	54	1	0	76.8433	2012-11-05	B9	not found/empty	4	8.5	3	6	4
32400070354041	324000703	54	1	0	31.9014	2012-10-30	C9		10	5	7	4	6
32400120154041	324001201	54	2	0	34.9076	2012-10-29	D9		3	5	9	4	8
32400160354041	324001603	54	1	0	31.8029	2012-10-29	E9		9	4	5	5	11
32400420154041	324004201	54	1	0	34.5435	2012-10-30	F9		7	4	7	8.5	6
32400420254041	324004202	54	2	0	29.7029	2012-10-29	G9		6	4	2	3.5	4
32400420354041	324004203	54	1	0	9.64545	2012-10-29	H9		5	6	8	5	4
32400420454041	324004204	54	1	0	6.83641	2012-10-29	A10		2	2	3	5	12
32400420554041	324004205	54	1	0	4.14784	2012-10-29	B10		3	5	6	8	4.5
32400430754041	324004307	54	1	0	45.7358	2012-10-29	C10		5.5	4	6	5	6
32400460154041	324004601	54	1	0	74.9733	2012-10-29	D10		7	8	6	4	6
32400460254041	324004602	54	2	0	60.8241	2012-10-29	E10		5	5	3	2	7
32400460454041	324004604	54	1	0	28.7392	2012-10-30	F10		5	5	8	11	7
32400460554041	324004605	54	2	0	25.1116	2012-10-30	G10		2	5.5	5	6	6
32400460754041	324004607	54	1	0	18.7159	2012-10-30	H10		2	4.5	7	6	11
							p.malariae		5	5	4255	9	12
							p.vivax		4	4	5.5	4391	14
							p.ovale		9.5	4515.5	1	8	6
							p.falc 72		2061	7.5	5	4	6
							p.falc 73		5	6	25	4	2740
							No DNA		3	5	7	3.5	9
							No DNA		7	2	2.5	6	9
							No DNA		5	4	5	6	8
							No ligase		4	5	5	2	5
							No ligase		5	3	8	7	7
							No ligase		4	5	4	5	8

## Sheet: Plate 3
Sample ID	Study ID	Round	Sex	Pf Microscopy Results	Age	Date of Collection	Plate position	Comments	P.Falc72 (12)	p.ovale (14)	p.malariae (30)	p.vivax (37)	p.falc73 (78)
32400461054041	324004610	54	2	0	23.3155	2012-10-29	A1		83	24	919	1185	50
32400540254041	324005402	54	2	0	43.4935	2012-10-30	B1		34	27	20	19	33
32400540654041	324005406	54	1	0	9.7358	2012-10-29	C1		29	21	18	18	39
32400590154041	324005901	54	1	0	31.9863	2012-10-29	D1		28	31	14	20	27.5
32400590254041	324005902	54	2	0	28.7365	2012-10-29	E1		23	27	21	22	34.5
32400590354041	324005903	54	2	0	8.21629	2012-10-29	F1		23	18.5	16	15	25
32400590454041	324005904	54	2	0	6.52977	2012-10-29	G1		26	32	18	13	32.5
32400590654041	324005906	54	1	0	3.90691	2012-10-29	H1		25	13	5	23	27
32400650154041	324006501	54	1	0	34.5133	2012-10-29	A2		35	33	17	21	45
32400650354041	324006503	54	2	0	8.82136	2012-10-29	B2		31	22	18	16.5	31.5
32400650554041	324006505	54	1	0	5.39357	2012-10-30	C2		26	13	20	17.5	38
32400800154041	324008001	54	1	0	40.3997	2012-10-30	D2		26	25	20	14	28
32400800254041	324008002	54	2	0	34.4723	2012-10-30	E2		20.5	23	24	20	31
32400800454041	324008004	54	1	0	8.64066	2012-10-29	F2		29	28	19.5	20	26.5
32400800554041	324008005	54	1	0	5.54415	2012-10-29	G2	not found/empty	28.5	29	19	21.5	27
32400890254041	324008902	54	2	0	55.2252	2012-10-30	H2		2	1	1	1	4
32400890154041	324008901	54	1	0	66.3299	2012-11-13	A3	not found/empty	24.5	23	16	23	38.5
32400930154041	324009301	54	1	0	51.8877	2012-10-30	B3		25.5	25	23	21	28.5
32400930254041	324009302	54	2	0	36.2053	2012-10-30	C3		31	17	19	15.5	36
32400930554041	324009305	54	1	0	14.4997	2012-10-29	D3		26	26.5	22	17	35.5
32400930754041	324009307	54	1	0	10.1766	2012-10-29	E3		31.5	19	15	17	29
32401070154041	324010701	54	2	0	33.2676	2012-10-30	F3		16	19	16	20	40.5
32401070354041	324010703	54	1	0	5.3306	2012-10-29	G3		23.5	23.5	23	22	30.5
32401170254041	324011702	54	1	0	4	2012-10-29	H3		26	23	14	20	31.5
32500020154041	325000201	54	1	0	36.9336	2012-11-13	A4		67	25	14	20	48.5
32500170254041	325001702	54	2	0	47.4031	2012-10-31	B4		32	22	13	20.5	36.5
32500170454041	325001704	54	2	0	21.2101	2012-10-30	C4		32	25	19	23	37
32500170554041	325001705	54	2	0	19.5455	2012-10-31	D4		25	23	19	18	37
32500170654041	325001706	54	2	0	17.2402	2012-10-31	E4		27	22.5	17	20	38.5
32500170854041	325001708	54	2	0	12.2136	2012-10-30	F4		20	21	20.5	21	25
32500170954041	325001709	54	2	0	9.54689	2012-10-30	G4		27	24	17	21	35
32500350154041	325003501	54	1	0	55.9644	2012-11-13	H4		30	24.5	20	15	41
32500350254041	325003502	54	2	0	46.5763	2012-10-31	A5		30	23.5	20	20	36
32500350854041	325003508	54	2	0	14.245	2012-10-30	B5		30	24	11	16.5	31
32500440154041	325004401	54	1	0	43.4141	2012-10-31	C5		26.5	21	15	14	30.5
32500440354041	325004403	54	2	0	17.4976	2012-10-31	D5		28	24	16	21	37
32500440454041	325004404	54	2	0	15.258	2012-10-30	E5		27	22	15	21	30
32500440554041	325004405	54	1	0	12.8624	2012-10-30	F5		32	23	21	23.5	31.5
32500440654041	325004406	54	1	0	9.21561	2012-10-30	G5		19	24	21	20	36.5
32500460154041	325004601	54	2	0	82.5133	2012-10-31	H5		32.5	27	24	19.5	41
32500480154041	325004801	54	1	0	43.488	2012-10-30	A6		24	23.5	22	22	35
32500480254041	325004802	54	2	0	40.2163	2012-10-31	B6		22.5	25.5	26	16	33
32500480354041	325004803	54	1	0	21.0075	2012-10-31	C6		29	27	18.5	18.5	34
32500480554041	325004805	54	1	0	15.5346	2012-10-30	D6		24	24	21	13	28
32500480654041	325004806	54	1	0	8.70637	2012-10-30	E6		27.5	17	16	20.5	38
32600150554041	326001505	54	2	0	13.1061	2012-10-31	F6	not found/empty	27	18	18	24	35
32600260254041	326002602	54	2	0	49.0623	2012-11-05	G6		34.5	26	17	20	36
32600260354041	326002603	54	1	0	26.2067	2012-11-13	H6		25	26	21	21	26
32600300354041	326003003	54	1	0	31.3374	2012-11-05	A7		27	19	10	18.5	29.5
32600420154041	326004201	54	2	0	73.8645	2012-11-13	B7		27	25	18	13	38.5
32600420354041	326004203	54	2	0	24.564	2012-10-31	C7		28	24	19	18	27
32600430854041	326004308	54	2	0	7.13484	2012-11-05	D7		24	26	12	18	35.5
32600430954041	326004309	54	2	0	4.46543	2012-11-05	E7		20	21	17	12.5	34
32600450154041	326004501	54	1	0	58.3491	2012-11-05	F7		25	20	17	17	24
32600450254041	326004502	54	2	0	46.7269	2012-11-05	G7		29	26.5	24	23	39
32600450454041	326004504	54	2	0	18.8556	2012-11-05	H7		18	24.5	20	18	33
32600450554041	326004505	54	2	0	16.5421	2012-11-05	A8		28	33	18	20	34
32600450654041	326004506	54	1	0	14.2396	2012-10-31	B8		25	21	17	13	28
32600510154041	326005101	54	1	0	59.447	2012-11-05	C8		18	22	16.5	16	38
32600510254041	326005102	54	2	0	51.3347	2012-11-05	D8		34	26	19	12	39
32600510354041	326005103	54	2	0	30.5818	2012-11-05	E8		24	27	19	18	34
32600510854041	326005108	54	1	0	14.7734	2012-10-30	F8		32	23	18	17	34
32600640454041	326006404	54	1	0	15.3155	2012-10-31	G8		27	29	21	24	35
32600760154041	326007601	54	2	0	28.0164	2012-11-05	H8		23	27	19	17.5	58
32600760254041	326007602	54	1	0	3.89322	2012-11-05	A9		26	22.5	18	18.5	56
32700040254041	327000402	54	2	0	68.8296	2012-10-31	B9		26	23	20	21.5	45
32700060354041	327000603	54	1	0	8.85421	2012-10-31	C9		24	23.5	16	17	48.5
32700060454041	327000604	54	1	0	8.85421	2012-10-31	D9		19.5	18	21	16	53
32700060554041	327000605	54	1	0	6.97604	2012-10-31	E9		22	20	16.5	13	49
32700070754041	327000707	54	2	0	14.4339	2012-10-30	F9		32	23	14	21	50
32700080154041	327000801	54	2	0	53.2183	2012-10-31	G9		30	32	22	21.5	54
32700080454041	327000804	54	2	0	16.167	2012-10-30	H9		29	26	18	20	70
32700080554041	327000805	54	2	0	11.4196	2012-10-30	A10		33	24.5	1047	21	63
32700170254041	327001702	54	2	0	25.1964	2012-11-05	B10		22	28.5	16	15.5	54.5
32700490154041	327004901	54	1	0	41.0322	2012-11-05	C10		24.5	32	16	19	48
32700490254041	327004902	54	2	0	38.8884	2012-11-05	D10		25	22	17.5	14	53
32700540154041	327005401	54	1	0	62.9295	2012-11-05	E10		34	37	23	19	54
32700540254041	327005402	54	2	0	54.1958	2012-11-05	F10		35	35	15.5	18.5	65
32700540654041	327005406	54	1	0	9.5989	2012-11-05	G10		36	30	20.5	18.5	58
32700540754041	327005407	54	2	0	11.3292	2012-11-05	H10		20	22	13.5	16	82
32700560354041	327005603	54	1	0	27.7399	2012-10-31	A11		25	34	14.5	21	58.5
32700590254041	327005902	54	1	0	5.93292	2012-11-05	B11		24	32	18	15	50
32700590354041	327005903	54	1	0	3.7974	2012-11-05	C11		27	25	21	14	56
32800090254041	328000902	54	2	0	33.243	2012-11-13	D11		37	31	17.5	21	59.5
32800310254041	328003102	54	2	0	40.2026	2012-11-12	E11		33	24.5	21	19	69
32800320154041	328003201	54	1	0	37.5934	2012-11-12	F11		27	28	21	21.5	70
32800390254041	328003902	54	2	0	33.7358	2012-11-12	G11		26	24.5	13	12	61.5
32900330154041	329003301	54	2	0	43.3785	2012-11-13	H11		20	1047	18.5	10.5	73
32900520354041	329005203	54	1	0	25.4565	2012-11-12	A12		30	573	26	15	64
33000100454041	330001004	54	2	0	27.5483	2012-11-12	B12		32	627	22	19	62
33000260354041	330002603	54	1	0	22.1136	2012-11-12	C12		39	951	27	20	65.5
								No DNA	28	32	15	18.5	58
								No DNA	23	27.5	13	19	71
								p.malariae	22	20	5279	15	26
								p.vivax	24	11	14	3690	42
								p.ovale	22	4233	12	19	32
								p.falc 72	2404	10	14	15.5	36
								p.falc 73	20	14	33	14.5	2922
								No ligase	21	18	22	10	20
								No ligase	18.5	22	14	13	20
								No ligase	13	24.5	16	14.5	24

## Sheet: Plate 4
Sample ID	Study ID	Round	Sex	Pf Microscopy Results	Age	Date of Collection	Plate position	Comments	P.Falc72 (12)	p.ovale (14)	p.malariae (30)	p.vivax (37)	p.falc73 (78)
20100140256041	201001402	56	2	0	31.7755	2013-04-22	A1		31	19	22	26	1404
20100170156041	201001701	56	2	0	50.6667	2013-04-22	B1		29	31	26	28	1730
20100350256041	201003502	56	2	0	41.3032	2013-04-22	C1		27.5	27	27	27	1789
20100350756041	201003507	56	1	0	7.88775	2013-04-22	D1		32	25.5	32	20	3216.5
20100530156041	201005301	56	1	0	63.2991	2013-04-22	E1		26	20	22	23	42
20100530256041	201005302	56	2	0	50.8775	2013-04-22	F1		44	1531	12	25	43
20100530756041	201005307	56	1	0	10.6995	2013-04-22	G1		24	28.5	18	22.5	34
20100610256041	201006102	56	2	0	38.4531	2013-04-22	H1	PCR-evaporated	17	26.5	25.5	15	27.5
20100610956041	201006109	56	2	0	4.49555	2013-04-22	A2		31	25	17	31	43
20100750356041	201007503	56	1	0	21.7823	2013-04-22	B2		20	32	21	38	25
20100810256041	201008102	56	2	0	40.7118	2013-04-22	C2		20	29	19	32	42
20100810456041	201008104	56	2	0	19.8658	2013-04-22	D2		40	38	20	25	45
20100940256041	201009402	56	2	0	29.8645	2013-04-22	E2		18	16	18	31	38
20100990356041	201009903	56	2	0	31.3511	2013-04-16	F2		20	18	21	23	35.5
20201420156041	202014201	56	1	0	41.87	2013-04-16	G2		20.5	17	28	14	45.5
20220020156041	202200201	56	1	0	39.3593	2013-04-16	H2		186	15	19	13	1835.5
20220100656041	202201006	56	1	0	4.16975	2013-04-16	A3		25	30.5	13	23	48
20302000556041	203020005	56	2	0	11.0856	2013-04-23	B3		38	28	24	26	36.5
20302040456041	203020404	56	1	0	18.8528	2013-04-15	C3		20	24	21	25	37.5
20302040556041	203020405	56	1	0	16.0548	2013-04-22	D3		17.5	28	20.5	11	36.5
20302040656041	203020406	56	1	0	13.0897	2013-04-23	E3		35	33	17.5	34	38
20302040756041	203020407	56	2	0	10.6502	2013-04-23	F3		23	27	24	29	40
20302110156041	203021101	56	1	0	56.9719	2013-04-22	G3		26	20	16	28	45
20302320356041	203023203	56	1	0	16.7009	2013-04-15	H3		18.5	24	4.5	30	27
20302320556041	203023205	56	2	0	11.6277	2013-04-15	A4		12	14	8.5	15	27.5
20302320656041	203023206	56	2	0	9.1937	2013-04-15	B4		37.5	22.5	9	30.5	36
20302520156041	203025201	56	1	0	51.4716	2013-04-23	C4		22	14.5	32	15	34
20302520756041	203025207	56	2	0	20.6653	2013-04-23	D4		30	26	20	15	26
20302520856041	203025208	56	1	0	16.7803	2013-04-23	E4		21	35	16	27.5	21
20302520956041	203025209	56	2	0	15.7864	2013-04-23	F4		17	23.5	18	8	34
20302521156041	203025211	56	1	0	6.00684	2013-04-23	G4		17	21	23	20	21.5
20330100456041	203301004	56	2	0	30.3053	2013-04-15	H4		27	20.5	20	15	32
20330100556041	203301005	56	2	0	10.59	2013-04-15	A5		43.5	26	16	24.5	35
20330100756041	203301007	56	2	0	5.4976	2013-04-15	B5		22	1196.5	10	23	47
20330140156041	203301401	56	2	0	5.99863	2013-04-15	C5		31	26.5	24	24.5	27
20402650556041	204026505	56	1	0	29.306	2013-04-23	D5		28	31	31	24	32
20402651056041	204026510	56	1	0	9.65092	2013-04-23	E5		19	26	16.5	27	28
20402651156041	204026511	56	1	0	7.40589	2013-04-23	F5		30	28	11	21	23
20402670156041	204026701	56	1	0	69.306	2013-04-23	G5		24	16.5	21.5	23	20
20402670256041	204026702	56	2	0	55.3046	2013-04-23	H5		19.5	23	10	17.5	21
20402670556041	204026705	56	1	0	12.835	2013-04-23	A6		22	18	22	17	36
20402750156041	204027501	56	2	0	45.1417	2013-04-15	B6		31	9.5	14.5	32	28
20402750656041	204027506	56	1	0	7.28816	2013-04-15	C6		15	19	18	25	37
20402920456041	204029204	56	2	0	17.6044	2013-04-23	D6		27	22	17	24	36
20402920656041	204029206	56	2	0	14.7406	2013-04-15	E6		34	14	15.5	22	32.5
20402920756041	204029207	56	1	0	10.3984	2013-04-15	F6		16	19.5	20	22	23
20402920856041	204029208	56	2	0	7.08282	2013-04-23	G6		28	14	26.5	15	33
20402920956041	204029209	56	1	0	6.63381	2013-04-15	H6		10	10	16	27	27
20402921056041	204029210	56	2	0	4.41068	2013-04-15	A7		17	19.5	3	15.5	11
20402930456041	204029304	56	1	0	28.4052	2013-04-23	B7		37	22.5	19	23	914
20440130156041	204401301	56	1	0	31.7399	2013-04-15	C7		19	30	15	24.5	32
20440130456041	204401304	56	1	0	4.04381	2013-04-15	D7		25	19	20.5	28	34
20440250156041	204402501	56	1	0	5.06776	2013-04-15	E7		12	21.5	17	18	29
20503390156041	205033901	56	1	0	50.3025	2013-04-22	F7		12	17	11	20	17.5
20503680256041	205036802	56	1	0	13.2211	2013-04-23	G7		25	1	19	17	36.5
20503720656041	205037206	56	1	0	44.7611	2013-04-22	H7		20	28	25	14	39
20503790156041	205037901	56	1	0	58.4559	2013-04-17	A8		18	14	6.5	27	28
20503790256041	205037902	56	2	0	44.2875	2013-04-17	B8		25	26	23	26	28
20503790556041	205037905	56	1	0	15.5948	2013-04-17	C8		23	21	23	19	37
20503790756041	205037907	56	2	0	8.63244	2013-04-17	D8		24	20	15	21	35
20503800156041	205038001	56	1	0	53.2895	2013-04-17	E8		25	19	30	21	38
20503800256041	205038002	56	2	0	47.2882	2013-04-17	F8		17	23	21	15.5	26
20503800756041	205038007	56	2	0	18.2888	2013-04-17	G8		28	12	10	14	23
20503800856041	205038008	56	2	0	13.8754	2013-04-17	H8	PCR-evaporated	14	5	20	15	37
20503800956041	205038009	56	2	0	12.5394	2013-04-17	A9		18	24	24	20	24
20503801056041	205038010	56	2	0	10.6229	2013-04-17	B9		26.5	21	19	26	29
20503801256041	205038012	56	1	0	7.12389	2013-04-17	C9		25	23.5	23	19	29
20503801356041	205038013	56	1	0	7.12389	2013-04-17	D9		23	16	4	15	30
20503950656041	205039506	56	2	0	23.9097	2013-04-23	E9		17	18	17	27	967
20503960856041	205039608	56	2	0	9.14442	2013-04-17	F9		13	17	14	18.5	30
20503960956041	205039609	56	1	0	7.48802	2013-04-17	G9		22	13	16	26.5	29
20503961056041	205039610	56	2	0	5.08693	2013-04-17	H9		21	32	19	32	26
20550030256041	205500302	56	2	0	31.3073	2013-04-24	A10		16	11	21	12	22
20550030456041	205500304	56	1	0	4.94456	2013-04-24	B10		11	19.5	17.5	27	31
20604060956041	206040609	56	2	0	12.2656	2013-04-17	C10		21	33	13	22	31
20604061256041	206040612	56	2	0	8.04654	2013-04-17	D10		17	18	18	19	32
20604061656041	206040616	56	2	0	5.53593	2013-04-17	E10		16	17	10	18	29
20604061856041	206040618	56	2	0	3.37303	2013-04-17	F10		21	10	12	13	21
20604180656041	206041806	56	2	0	11.9589	2013-04-17	G10		21	22	17.5	14	30
20604330156041	206043301	56	1	0	57.2895	2013-04-17	H10		25.5	15	13	21.5	8
20604330256041	206043302	56	2	0	47.2882	2013-04-17	A11		21	23.5	19	6	31
20604330456041	206043304	56	1	0	9.64819	2013-04-23	B11		24	26	24	30	41
20604330556041	206043305	56	1	0	7.58932	2013-04-17	C11		20	23	17	25	37
20604560256041	206045602	56	2	0	43.3073	2013-04-24	D11		19	17.5	14	16	33
						empty	E11
						empty	F11
						No DNA	G11		18	19	25	26.5	30
						No DNA	H11		22	27	24	14.5	24
						pm	A12		14	17	6508	16	30
						pv	B12		12	31	24.5	5963.5	42
						po	C12		30	6685.5	32	37	26
						pf72	D12		3037	17	10	25	22
						pf73	E12		23	19	41.5	19	4480
						no ligase	F12		14	1	17	18	18
						no ligase	G12		10	8.5	14	13.5	21
						no ligase	H12		16.5	26	8	14	39

[truncated: 7 more sheets: Plate 5, Plate 6, Repeats from all plates, Results all samples, Stata -Results, Trouble-shooting, Nested PCR results]
